# Supplementary material for: Atrial fibrillation detection using single lead portable electrocardiographic monitoring: a systematic review and meta-analysis
Source: PubMed Central journal article supplement — BMJ Open. 2018 Sep 17;8(9):e024178. doi: 10.1136/bmjopen-2018-024178 (PMC6144487; doi:10.1136/bmjopen-2018-024178), 2018-09-17

Supplementary Table 1.

Database: Ovid MEDLINE

Search Strategy:

- 
- 1 exp Atrial Fibrillation/ (46578)
  - 2 atrial fibrillation.tw. (48670)
  - 3 AF.tw. (26772)
  - 4 Mass Screening/ (94291)
  - 5 1 or 2 or 3 (69465)
  - 6 screening.tw. (382365)
  - 7 Monitoring, Ambulatory/ (7308)
  - 8 Electrocardiography/ (185379)
  - 9 Electrocardiography, Ambulatory/ or Arrhythmias, Cardiac/ or Electrocardiography/ (232205)
  - 10 monitoring.tw. (353950)
  - 11 Diagnosis/ (17394)
  - 12 electrocardiography.tw. (11752)
  - 13 ECG.tw. (52917)
  - 14 7 or 8 or 9 or 12 or 13 (258115)
  - 15 4 or 6 or 10 or 11 (769528)
  - 16 5 and 14 and 15 (1684)
-

Supplementary Table 2.

| <b>Author</b>         | <b>Year</b> | <b>Reason for exclusion</b>                                                               |
|-----------------------|-------------|-------------------------------------------------------------------------------------------|
| Barrett et. al.       | 2014        | Primary outcome not AF detection                                                          |
| Bhatt et. al.         | 2011        | 28 day event recorder used for AF detection                                               |
| Kamel et. al.         | 2013        | 21 day mobile cardiac outpatient telemetry unit used for AF detection                     |
| Miller et. al.        | 2013        | 30 day mobile cardiac outpatient telemetry unit used for AF detection                     |
| Rabenstein et. al.    | 2013        | 21 day mobile cardiac outpatient telemetry unit used for AF detection                     |
| Tayal et. al.         | 2008        | 21 day mobile cardiac outpatient telemetry unit used for AF detection                     |
| Flint et. al.         | 2012        | 30 day event recorder used for AF detection                                               |
| Christensen et. al.   | 2014        | Implantable loop recorder used for AF detection                                           |
| Cotter et. al.        | 2013        | Implantable loop recorder used for AF detection                                           |
| Dion et. al.          | 2010        | Implantable loop recorder used for AF detection                                           |
| Sanna et. al.         | 2014        | Implantable cardiac monitor used for AF detection                                         |
| Merce et. al.         | 2013        | Implantable loop recorder used for AF detection                                           |
| Elijovich et. al.     | 2009        | 30 day event recorder used for AF detection                                               |
| Wallmann et. al.      | 2007        | Serial 7 day event recorders used for AF detection                                        |
| Kral et. al.          | 2015        | Substudy (poster) only investigating patients <40 yrs                                     |
| Lip et. al.           | 2016        | AF detection not primary objective                                                        |
| Anczykowski et. al.   | 2016        | Trans-telephonic event recorder used for arrhythmia detection                             |
| Baturova et. al.      | 2016        | AF detection not primary objective                                                        |
| Yu et. al.            | 2009        | Retrospective review with missing demographic data and AF detection not primary objective |
| Destaghe et. al.      | 2016        | Primary purpose was assessing test performance of 2 different ECG devices                 |
| Lowres et. al.        | 2016        | Post cardiothoracic surgery patients with known episode of AF post-op                     |
| Benito et. al.        | 2015        | 12 lead ECG used for screening                                                            |
| Bury et. al.          | 2012        | 3 lead ECG used for screening                                                             |
| Turakhia et. al.      | 2015        | Wearable patch used for ambulatory monitoring                                             |
| Tieleman et. al.      | 2014        | AF screening not primary objective                                                        |
| Rabenstein et. al.    | 2015        | Review article                                                                            |
| Sposato et. al.       | 2015        | Review article                                                                            |
| Schnabel et. al.      | 2009        | Main aim was to develop an AF risk score                                                  |
| Chamberlain et. al.   | 2011        | Main aim was to develop an AF risk score                                                  |
| Lowres et. al.        | 2013        | Review article                                                                            |
| de Vito et. al.       | 2014        | AF in post orthopaedic surgery patients with inpatient monitoring                         |
| Magee et. al.         | 2007        | Post cardiothoracic surgery patients with inpatient monitoring                            |
| Her et. al.           | 2013        | Post cardiothoracic surgery patients with inpatient monitoring                            |
| Freedman et. al.      | 2016        | Editorial article                                                                         |
| Turakhia et. al.      | 2016        | Review article                                                                            |
| Levin et. al.         | 2015        | Cost analysis primary objective                                                           |
| Fitzmaurice et. al.   | 2007        | Pulse palpation used for AF detection                                                     |
| Rhys et. al.          | 2013        | Pulse palpation used for AF detection                                                     |
| Ziegler et. al.       | 2010        | Used implantable devices for AF detection                                                 |
| Akiyama et. al.       | 2017        | Wearable patch used for AF detection                                                      |
| Thom et. al.          | 2016        | Review article                                                                            |
| Engdahl et. al.       | 2017        | Trial design paper                                                                        |
| Rojo-Martinez et. al. | 2013        | Implantable cardiac monitor used for AF detection                                         |

|                   |      |                                                                        |
|-------------------|------|------------------------------------------------------------------------|
| Poisson et. al.   | 2011 | Review article                                                         |
| Etgen et. al.     | 2013 | Implantable cardiac monitor used for AF detection                      |
| Marazzi et. al.   | 2012 | Blood Pressure monitor used for AF detection                           |
| Wiesel et. al.    | 2014 | Blood Pressure monitor used for AF detection                           |
| Lewis et. al.     | 2011 | Finger probe plethysmography used for AF detection                     |
| McManus et. al.   | 2016 | Iphone based plethysmography used for AF detection                     |
| Shanmugam et. al. | 2012 | Heart failure patients with cardiac resynchronization therapy          |
| Keach et. al.     | 2015 | Review article                                                         |
| Borian et, al.    | 2014 | Implantable devices used for AF detection                              |
| Alonso et. al.    | 2013 | Primary aim was to determine clinical score to assess AF risk          |
| Steven et. al.    | 2016 | Trial design paper - wearable sensors for AF detection                 |
| Lau et. al.       | 2013 | Primary aim was to determine accuracy of AF algorithm                  |
| Gaillard et al.   | 2010 | Transtelephonic monitoring used for AF detection                       |
| Orlov et. al.     | 2007 | AF detection based on patients with permanent pacemakers               |
| Martinez et. al.  | 2014 | Primary aim was to determine prognosis of patients with subclinical AF |
| Wang et al.       | 2017 | Trial design paper                                                     |

Supplementary Table 3.

| <b>Study</b>               | <b>Objective and outcome described</b> | <b>Appropriate reporting of comorbidities</b> | <b>Inclusion criteria specified</b> | <b>Incomplete Outcome Data</b> | <b>Efforts to reduce bias</b> | <b>Limitations discussed</b> | <b>External validity of study discussed</b> |
|----------------------------|----------------------------------------|-----------------------------------------------|-------------------------------------|--------------------------------|-------------------------------|------------------------------|---------------------------------------------|
| Lowres et. al. (2014)      | Yes                                    | Yes                                           | Yes                                 | No                             | No                            | No                           | Yes                                         |
| Svennberg et. al. (2015)   | Yes                                    | Yes                                           | Yes                                 | No                             | No                            | Yes                          | Yes                                         |
| Proietti et. al. (2016)    | Yes                                    | Yes                                           | Yes                                 | No                             | No                            | Yes                          | Yes                                         |
| Kaasenbrood et. al. (2016) | Yes                                    | No                                            | Yes                                 | Yes                            | No                            | Yes                          | No                                          |
| Engdahl et. al. (2013)     | Yes                                    | Yes                                           | Yes                                 | Yes                            | Yes                           | Yes                          | Yes                                         |
| Hendrikkx et. al. (2013)   | Yes                                    | Yes                                           | Yes                                 | No                             | No                            | Yes                          | Yes                                         |
| Hendrikkx et. al. (2014)   | Yes                                    | Yes                                           | Yes                                 | No                             | No                            | Yes                          | Yes                                         |
| Chan et. al. (2016)        | Yes                                    | Yes                                           | Yes                                 | Yes                            | No                            | No                           | Yes                                         |
| Sobocinski et. al. (2012)  | Yes                                    | Yes                                           | Yes                                 | No                             | No                            | Yes                          | Yes                                         |
| Doliwa et. al. (2009)      | Yes                                    | No                                            | Yes                                 | No                             | No                            | Yes                          | Yes                                         |
| Ramkumar et. al. (2017)    | Yes                                    | Yes                                           | Yes                                 | No                             | No                            | Yes                          | Yes                                         |
| Hendrikkx et. al. (2017)   | Yes                                    | Yes                                           | Yes                                 | No                             | No                            | Yes                          | Yes                                         |
| Claes et. al. (2011)       | Yes                                    | Yes                                           | Yes                                 | Yes                            | No                            | Yes                          | Yes                                         |
| Samol et. al. (2012)       | Yes                                    | Yes                                           | Yes                                 | No                             | No                            | Yes                          | Yes                                         |
| Battipaglia et. al. (2016) | Yes                                    | No                                            | No                                  | No                             | Yes                           | Yes                          | Yes                                         |
| Chan et. al. (2016)        | Yes                                    | Yes                                           | Yes                                 | No                             | Yes                           | Yes                          | Yes                                         |
| Chan et. al. (2017)        | Yes                                    | No                                            | Yes                                 | No                             | No                            | Yes                          | Yes                                         |
| Halcox et. al. (2017)      | Yes                                    | Yes                                           | Yes                                 | No                             | No                            | Yes                          | Yes                                         |
| Gladstone et. al. (2014)   | Yes                                    | Yes                                           | Yes                                 | No                             | Yes                           | Yes                          | Yes                                         |
| Barthelemy et. al. (2003)  | Yes                                    | Yes                                           | Yes                                 | No                             | Yes                           | No                           | No                                          |
| Jabaudon et. al. (2004)    | Yes                                    | Yes                                           | Yes                                 | No                             | No                            | No                           | Yes                                         |
| Koudstaal et. al. (1986)   | Yes                                    | No                                            | Yes                                 | No                             | No                            | No                           | No                                          |
| Hornig et. al. (1996)      | Yes                                    | No                                            | Yes                                 | No                             | Yes                           | No                           | Yes                                         |
| Rizos et. al. (2012)       | Yes                                    | Yes                                           | Yes                                 | No                             | Yes                           | Yes                          | Yes                                         |
| Schuchert et. al. (1999)   | Yes                                    | No                                            | Yes                                 | No                             | No                            | No                           | No                                          |
| Schaer et. al. (2009)      | Yes                                    | Yes                                           | Yes                                 | No                             | No                            | Yes                          | Yes                                         |
| Schaer et. al. (2004)      | Yes                                    | No                                            | Yes                                 | No                             | No                            | Yes                          | Yes                                         |
| Shafqat et. al. (2004)     | Yes                                    | No                                            | Yes                                 | No                             | No                            | No                           | Yes                                         |
| Lazzaro et. al. (2012)     | Yes                                    | Yes                                           | Yes                                 | No                             | No                            | Yes                          | Yes                                         |
| Grond et. al. (2013)       | Yes                                    | Yes                                           | Yes                                 | Yes                            | Yes                           | No                           | Yes                                         |
| Stahrenberg et. al. (2010) | Yes                                    | Yes                                           | Yes                                 | Yes                            | Yes                           | No                           | Yes                                         |
| Ritter et. al. (2013)      | Yes                                    | Yes                                           | Yes                                 | No                             | No                            | No                           | Yes                                         |
| Higgins et. al. (2013)     | Yes                                    | No                                            | Yes                                 | No                             | Yes                           | Yes                          | Yes                                         |

|                               |     |     |     |     |     |     |     |
|-------------------------------|-----|-----|-----|-----|-----|-----|-----|
| Thakkar et. al. (2014)        | Yes | Yes | Yes | No  | Yes | Yes | Yes |
| Wachter et. al. (2017)        | Yes |
| Gumbinger et. al. (2012)      | Yes | No  | Yes | No  | Yes | No  | Yes |
| Alhadramy et. al. (2010)      | Yes | Yes | Yes | No  | Yes | Yes | Yes |
| Dangayach et. al. (2011)      | Yes | Yes | Yes | No  | Yes | No  | Yes |
| Gunalp et. al. (2006)         | Yes | No  | Yes | No  | Yes | No  | No  |
| Fonseca et. al. (2013)        | Yes | Yes | Yes | No  | Yes | Yes | Yes |
| Manina et. al. (2014)         | Yes | No  | Yes | No  | Yes | No  | Yes |
| Tagawa et. al. (2007)         | Yes | No  | Yes | No  | Yes | Yes | Yes |
| Shibazaki et. al. (2012)      | Yes | Yes | Yes | No  | Yes | Yes | Yes |
| Vandebroucke et. al. (2004)   | Yes | No  | Yes | No  | No  | Yes | Yes |
| Yodogawa et. al. (2013)       | Yes | No  | Yes | No  | Yes | Yes | Yes |
| Atmuri et. al. (2012)         | Yes | No  | Yes | No  | No  | Yes | Yes |
| Salvatori et. al. (2015)      | Yes | Yes | Yes | No  | Yes | No  | Yes |
| Beaulieu-Boire et. al. (2013) | Yes | Yes | Yes | No  | Yes | Yes | Yes |
| Dogan et. al. (2011)          | Yes | No  | Yes | No  | No  | Yes | No  |
| Douen et. al. (2008)          | Yes | No  | Yes | No  | Yes | No  | No  |
| Suissa et. al. (2012)         | Yes | No  | Yes | No  | Yes | Yes | Yes |
| Wohlhahrt et. al. (2013)      | Yes | Yes | Yes | No  | Yes | Yes | Yes |



Supplementary Figure 1.

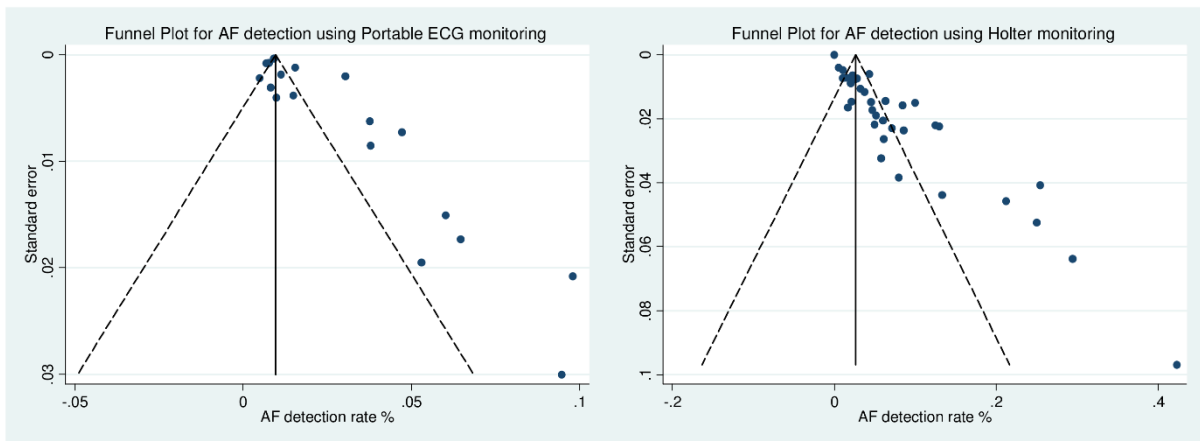

Supplement: bmjopen-2018-024178supp001.pdf [file bmjopen-2018-024178supp001.pdf]
