# Supplementary material for: Atrial fibrillation detection using single lead portable electrocardiographic monitoring: a systematic review and meta-analysis
Source: PubMed Central journal article supplement — BMJ Open. 2018 Sep 17;8(9):e024178. doi: 10.1136/bmjopen-2018-024178 (PMC6144487; doi:10.1136/bmjopen-2018-024178), 2018-09-17
Supplement: bmjopen-2018-024178.draft_revisions.pdf [file bmjopen-2018-024178.draft_revisions.pdf]

# BMJ Open

BMJ Open is committed to open peer review. As part of this commitment we make the peer review history of every article we publish publicly available.

When an article is published we post the peer reviewers' comments and the authors' responses online. We also post the versions of the paper that were used during peer review. These are the versions that the peer review comments apply to.

The versions of the paper that follow are the versions that were submitted during the peer review process. They are not the versions of record or the final published versions. They should not be cited or distributed as the published version of this manuscript.

BMJ Open is an open access journal and the full, final, typeset and author-corrected version of record of the manuscript is available on our site with no access controls, subscription charges or pay-per-view fees (<http://bmjopen.bmj.com>).

If you have any questions on BMJ Open's open peer review process please email [info.bmjopen@bmj.com](mailto:info.bmjopen@bmj.com)

# BMJ Open

## Atrial Fibrillation Detection using Single Lead Portable Electrocardiographic Monitoring: A Systematic Review and Meta-Analysis.

|                               |                                                                                                                                                                                                                                                                                                                                                |
|-------------------------------|------------------------------------------------------------------------------------------------------------------------------------------------------------------------------------------------------------------------------------------------------------------------------------------------------------------------------------------------|
| Journal:                      | <i>BMJ Open</i>                                                                                                                                                                                                                                                                                                                                |
| Manuscript ID                 | bmjopen-2018-024178                                                                                                                                                                                                                                                                                                                            |
| Article Type:                 | Research                                                                                                                                                                                                                                                                                                                                       |
| Date Submitted by the Author: | 02-Jun-2018                                                                                                                                                                                                                                                                                                                                    |
| Complete List of Authors:     | Ramkumar, Satish; Baker IDI Heart and Diabetes Institute, CV Imaging<br>Nerlekar, Nitesh; Monash Medical Centre Clayton<br>D'Souza , Daniel ; Monash Medical Centre Clayton<br>Pol , Derek ; Monash Medical Centre Clayton<br>Kalman, Jonathan; Royal Melbourne Hospital,<br>Marwick, Thomas; Baker IDI Heart and Diabetes Institute, Director |
| Keywords:                     | Pacing & electrophysiology < CARDIOLOGY, CLINICAL PHYSIOLOGY,<br>Cardiology < INTERNAL MEDICINE                                                                                                                                                                                                                                                |
|                               |                                                                                                                                                                                                                                                                                                                                                |

SCHOLARONE™  
Manuscripts

Peer Review Only

**Atrial Fibrillation Detection using Single Lead Portable Electrocardiographic Monitoring:****A Systematic Review and Meta-Analysis.**

Satish Ramkumar MBBS, MMed<sup>1,2,3</sup>; Nitesh Nerlekar MBBS, MPH<sup>1,3</sup>; Daniel D'Souza MBBS<sup>3</sup>,  
Derek J Pol MBBS<sup>3</sup>; Jonathan M Kalman<sup>4</sup> MBBS, PhD; Thomas H Marwick MBBS, PhD, MPH<sup>1,2</sup>

<sup>1</sup>Baker Heart and Diabetes Institute, 75 Commercial Road Melbourne, Victoria 3004, Australia;

<sup>2</sup>School of Public Health and Preventative Medicine, Monash University, 99 Commercial Road,  
Melbourne, Victoria 3004, Australia; <sup>3</sup>Monash Heart, Monash Cardiovascular Research Centre, 246  
Clayton Road, Clayton, Victoria 3168, Australia; <sup>4</sup>Department of Cardiology, Royal Melbourne  
Hospital and the Department of Medicine, University of Melbourne, 300 Grattan Street Parkville,  
Victoria 3050, Australia;

Satish Ramkumar Cardiac Imaging Research Fellow, Baker Heart and Diabetes Institute; Nitesh  
Nerlekar Cardiac Research Fellow, Monash Heart; Daniel D'Souza Cardiology Resident, Monash  
Heart; Derek J Pol Cardiology Registrar, Monash Heart; Jonathan M Kalman Head of  
Electrophysiology, Royal Melbourne Hospital; Thomas H Marwick Director, Baker Heart and  
Diabetes Institute

Running title: Atrial fibrillation detection

Corresponding Author:

Dr Thomas H. Marwick  
Baker Heart and Diabetes Institute,  
75 Commercial Road, Melbourne, 3004, Australia  
Phone: +61-3-8532-1550; Fax: +61-3-8532-1160  
Email: [Tom.Marwick@baker.edu.au](mailto:Tom.Marwick@baker.edu.au)

Abstract 249 words; Text ~5000 words

1  
2  
3 “The Corresponding Author has the right to grant on behalf of all authors and does grant on behalf of  
4 all authors, *a worldwide licence* to the Publishers and its licensees in perpetuity, in all forms, formats  
5 and media (whether known now or created in the future), to i) publish, reproduce, distribute, display  
6 and store the Contribution, ii) translate the Contribution into other languages, create adaptations,  
7 reprints, include within collections and create summaries, extracts and/or, abstracts of the  
8 Contribution, iii) create any other derivative work(s) based on the Contribution, iv) to exploit all  
9 subsidiary rights in the Contribution, v) the inclusion of electronic links from the Contribution to third  
10 party material where-ever it may be located; and, vi) licence any third party to do any or all of the  
11 above.”  
12  
13  
14  
15  
16  
17  
18  
19  
20  
21  
22

23 **Funding:** This research received no specific grant from any funding agency in the public, commercial  
24 or not-for-profit sectors’.  
25  
26  
27  
28  
29  
30  
31  
32  
33  
34  
35  
36  
37  
38  
39  
40  
41  
42  
43  
44  
45  
46  
47  
48  
49  
50  
51  
52  
53  
54  
55  
56  
57  
58  
59  
60

**ABSTRACT**

**Objectives:** Recent advances in technology have allowed for heart rhythm monitoring using portable single-lead electrocardiographic (ECG) monitoring devices, which can be used for early diagnosis of atrial fibrillation (AF). We sought to investigate the AF detection rate using portable ECG devices compared with Holter monitoring.

**Setting, participants and outcome measures:** We searched the Medline, Embase and Scopus databases (search conducted on 8<sup>th</sup> May 2017) using search terms related to AF and screening and included studies with adults >18 years using portable ECG devices or Holter monitoring for AF detection. We excluded studies using implantable loop recorders and pacemakers. Using a random-effects model we calculated the overall AF detection rate. Meta-regression analysis was performed to explore potential sources for heterogeneity.

**Results:** Portable ECG monitoring was used in 18 studies (n=117,436) and Holter monitoring was used in 36 studies (n=8498). The AF detection rate using portable ECG monitoring was 1.7% (95% CI 1.4–2.1), with significant heterogeneity between studies (p<0.001). There was a moderate linear relationship between total monitoring time and AF detection rate (r=0.65, p=0.003), and meta-regression identified total monitoring time (p=0.005) and body mass index (p=0.01) as potential contributors to heterogeneity. The detection rate (4.8%, 95% CI 3.6–6.0%) in 8 studies (n=10,199) which performed multiple ECG recordings was comparable to that with 24 hour Holter (4.6%, 95% CI 3.5–5.7%). Intermittent recordings for 19 minutes total produced similar AF detection to 24 hr. Holter monitoring.

**Conclusion:** Portable ECG devices may offer an efficient screening option for AF compared to 24 hour Holter monitoring.

**Study Registration:** Prospero database - April 22<sup>nd</sup>, 2017(CRD42017061021)

**Key words;** atrial fibrillation, screening, electrocardiographic monitoring.

**Strengths and limitations of this study:**

- First systematic review comparing single lead ECG monitoring to 24 hour holter monitoring for AF detection.
- Comprehensive literature search and specific inclusion criteria allowing for large patient numbers.
- Heterogeneity amongst individual studies with regards to patient population, AF definitions and monitoring time.
- Poor reporting of CHA<sub>2</sub>DS<sub>2</sub>-VASC scores amongst individual studies
- Patient compliance unable to be accounted for in this meta-analysis

1  
2  
3  
4  
5 Atrial fibrillation (AF) is a leading cause of stroke and heart failure worldwide, is associated with  
6 increased all-cause mortality<sup>1,2</sup> as well as substantial financial cost.<sup>3,4</sup> The prevalence of AF increases  
7 with age, exceeding more than 15% for those aged 85 and older.<sup>5</sup> The epidemics of obesity, diabetes  
8 mellitus and metabolic syndrome have also been associated with the increasing prevalence of AF.<sup>6-8</sup>  
9 Up to 20% of patients with stroke have underlying AF, and detection allows the initiation of  
10 anticoagulation which is associated with a significant reduction in stroke recurrence.<sup>9</sup>

11  
12  
13  
14  
15  
16  
17  
18 Early diagnosis of AF may have several benefits, including individualized lifestyle intervention<sup>10</sup> and  
19 anticoagulation, and may be associated with a reduction in complications and healthcare costs. The  
20 importance of early diagnosis has been recognized in recent guidelines from the European Society of  
21 Cardiology (ESC) which recommended opportunistic screening using pulse palpation and 12 lead  
22 electrocardiogram (ECG).<sup>11</sup> However, screening for AF is challenging for several reasons; many  
23 patients are asymptomatic or may have atypical symptoms. There are a variety of monitoring  
24 techniques available, all which vary in diagnostic accuracy and sensitivity, and there is no accepted  
25 reference standard. Subclinical AF is associated with an increased risk of stroke, cardiovascular  
26 disease and all-cause mortality,<sup>12</sup> although there is controversy surrounding the significance of brief  
27 paroxysms of AF and the potential benefit of anticoagulant therapy. Implantable devices are  
28 expensive, and not cost effective for mass screening, and the use of external devices for long periods  
29 of monitoring require electrodes, which may be poorly tolerated by patients.

30  
31  
32  
33  
34  
35  
36  
37  
38  
39  
40  
41  
42 Recent advances in technology have allowed for the development of single lead portable  
43 electrocardiographic monitoring devices. Multiple devices are available, all using multiple points of  
44 finger contact to create a single lead ECG trace. The in-built memory of these devices allows for  
45 single or multiple time-point screening. Interpretation from a cardiologist or by automated algorithms  
46 has achieved high sensitivity and specificity for AF detection.<sup>13-15</sup> Although they have not been  
47 incorporated into the latest AF guidelines, the accuracy, ease of use and potential cost-effectiveness of  
48 these devices may lead to them having an important role in AF screening. This paper describes a  
49  
50  
51  
52  
53  
54  
55  
56  
57  
58  
59  
60

1  
2  
3 systematic review of the published literature to investigate the overall AF detection rate using portable  
4  
5 ECG devices compared with traditional Holter monitoring.  
6

### 7 8 **Methods.**

9  
10 **Search strategy.** We conducted our systematic review and meta-analysis using the Preferred  
11 Reporting Items for Systematic Reviews and Meta-Analyses guideline (PRISMA).<sup>16</sup> We searched the  
12 Medline, Scopus and Embase databases using key terms including “atrial fibrillation/AF and  
13 screening/monitoring and electrocardiographic/Holter monitoring” which were mapped to subject  
14 headings. We also searched the reference lists to identify other potential articles. The search was  
15 limited to adult human subjects >18 years and limited to the English language (Supplementary Table  
16 1). The study was prospectively registered on the Prospero database on April 22<sup>nd</sup>,  
17 2017(CRD42017061021), and the search was conducted on 8<sup>th</sup> May 2017.  
18  
19  
20  
21  
22  
23  
24

25 **Study selection.** Titles and abstracts of studies identified from the search were reviewed by two  
26 independent reviewers (S.R and D.D). Studies which had a primary aim of AF detection in adult  
27 participants were included. We included all cohorts including community screening, those with risk  
28 factors and recent stroke. The screening methods included portable single lead ECG devices or  
29 continuous (Holter) monitoring (up to one week). We included studies which used single lead ECG  
30 devices for single episode screening or multiple intermittent screening periods. We included  
31 conference abstracts if demographic and outcome data were available. We excluded studies if  
32 participants were <18 years or if other forms of monitoring were used (pacemaker, implantable loop  
33 recorders, event recorders, monitoring patches and inpatient telemetry). We also excluded studies  
34 where AF detection was not the primary aim.  
35  
36  
37  
38  
39  
40  
41  
42  
43  
44

45 The primary outcome of interest was the detection rate of new AF using either single lead intermittent  
46 or continuous monitoring. Our secondary objective was to determine the optimal time of intermittent  
47 monitoring which produced equivalent AF detection to continuous monitoring.  
48  
49  
50

51 **Data Collection.** Full text manuscripts of studies fitting the inclusion criteria were obtained. Quality  
52 of reporting and risk of bias was assessed using the tool developed by Downs and Black.<sup>17</sup> A  
53 standardized data-extraction form was used by the reviewers which included information about the  
54  
55  
56  
57  
58  
59  
60



1  
2  
3 patient demographics, comorbidities, screening strategy, patients with known AF and overall new AF  
4  
5 detection rate. Where data were not reported, we attempted to contact the primary authors of the  
6  
7 study. Any disagreements between the two reviewers were resolved by consensus or by consulting a  
8  
9 third reviewer (TM).

10 **Patient and public involvement.** As this is a systematic review, no patient or public involvement was  
11  
12 undertaken.  
13

14 **Statistical Analysis.** The cumulative AF detection rate for continuous and intermittent monitoring  
15  
16 and the 95% confidence interval was calculated using a random effects model. The results were  
17  
18 displayed as a forest plot and heterogeneity amongst the studies was assessed using the  $I^2$  statistic. A  
19  
20 subgroup analysis was performed by comparing the cumulative detection rate of single lead ECG  
21  
22 studies which performed multiple timepoint recordings with 24 hour Holter monitoring studies. Linear  
23  
24 regression analysis was used to determine the association between the total monitoring time and AF  
25  
26 detection using single lead ECG devices. This formula was used to determine the monitoring time  
27  
28 using single lead ECG devices to approximate the overall AF detection rate using 24-hour continuous  
29  
30 monitoring. Univariate meta-regression analysis was performed to assess the influence of various  
31  
32 clinical and screening factors with AF detection. Publication bias was assessed using a funnel plot and  
33  
34 the Egger test. Statistical analysis was performed using Stata v.13 (StataCorp, College Station, TX)  
35  
36 with two-tailed p-values <0.05 used to denote statistical significance.  
37  
38  
39

## 40 **Results**

41  
42 **Study Characteristics.** The PRISMA flowchart of our included studies is shown in Figure 1. Our  
43  
44 initial search strategy identified 5427 studies, with another 26 identified through other sources. After  
45  
46 removing duplicate records, 4122 studies were left. After screening those using the  
47  
48 inclusion/exclusion criteria, we identified 111 full text studies for detailed review, which excluded 59  
49  
50 studies, leaving 52 full text studies for inclusion in the meta-analysis (see Supplementary table 2 for  
51  
52 excluded studies). Of the 52 studies included, 34 used continuous (Holter) monitoring (n=8154),<sup>18-51</sup>  
53  
54 16 (n=117,092) used single lead portable ECG monitoring,<sup>14 15 52-65</sup> and 2 studies (n=344) used both  
55  
56 continuous and intermittent single lead monitoring for AF detection in a head to head comparison.<sup>66 67</sup>  
57  
58  
59

1  
2  
3 The baseline characteristics of the individual studies is presented in Table 1. There was a considerable  
4 range in age (54-76 years), and gender (male 29-77%) between studies. As many studies chose  
5 healthy volunteers and other studies focused on patients post stroke or those with AF risk factors,  
6 there was significant variation in comorbidities such as diabetes, hypertension and obesity. Stroke risk  
7 determined by the CHADS or CHA<sub>2</sub>DS<sub>2</sub>-VASC score was reported in only 14/52 studies (27%). Of  
8 the 52 studies, 36 (69%) were conducted in Europe, 8 (15%) were in Asia, 5 (10%) were in North  
9 America and 3 (6%) in Australia. Nine studies (17%) were retrospective, the remainder all being  
10 prospective cohort or randomized controlled trials.  
11  
12

13  
14  
15  
16  
17  
18 Of the 18 studies using single lead ECG devices, 10 studies (56%) used a single 10-60 sec recording  
19 for AF detection whilst 8 studies (44%) used multiple readings over a 1-52 week period. There were  
20 five portable ECG devices used (Table 1). Sixteen studies (89%) used healthy participants with risk  
21 factors.<sup>14 15 52-61 63-65 67</sup>. Two studies assessed patients following stroke or transient ischemic attack  
22 (TIA).<sup>62 66</sup>  
23  
24  
25  
26  
27

28 Of the 36 studies using continuous (Holter) monitoring, 27 studies (75%) used 24-hour continuous  
29 monitoring,<sup>18-23 25-28 33-36 38 39 41-45 47-50 66 67</sup> 4 studies (11%) used 1 week monitoring,<sup>30-32 51</sup> 2 studies (6%)  
30 used 48-hour monitoring,<sup>37 46</sup> 2 studies (6%) used 72-hour monitoring,<sup>24 29</sup> and 1 study (3%) used 96-  
31 hour monitoring.<sup>40</sup>  
32  
33  
34  
35  
36  
37  
38  
39  
40  
41  
42  
43  
44  
45  
46  
47  
48  
49  
50  
51  
52  
53  
54  
55  
56  
57  
58  
59  
60

| Study                        | n     | Country   | Type of patients used                                                                                 | Device Used                    | Duration of recording (sec) | Frequency of recording /day | Total monitoring (days) | Mean/median age (yrs) | Male (%) | BMI (kg/m <sup>2</sup> ) | HTN (%) | DM (%) | IHD (%) | Previous diagnosis of AF (%) | HF (%) | Previous stroke (%) | Mean/median CHADS2/CHADS-VASC | Definition of AF                                                                                 | New AF (n) | New AF rate (%) |     |
|------------------------------|-------|-----------|-------------------------------------------------------------------------------------------------------|--------------------------------|-----------------------------|-----------------------------|-------------------------|-----------------------|----------|--------------------------|---------|--------|---------|------------------------------|--------|---------------------|-------------------------------|--------------------------------------------------------------------------------------------------|------------|-----------------|-----|
| Owres et al. (2014) 52       | 1000  | Australia | Community pharmacy screening                                                                          | Alive Cor                      | 60                          | 1                           | 0                       | 76                    | 44       | NR                       | 62      | 23     | 16      | 10.4                         | 3      | 7                   | 3.3                           | Cardiologist Interpretation                                                                      | 15         | 1.5             |     |
| Svennberg et al. (2015) 53   | 7173  | Sweden    | Community screening (75-76 yr olds)                                                                   | Zenico Omron Heartscan HCG-801 | 30                          | 2                           | 14                      | 75                    | 46       | 25.9                     | 50      | 11     | 9.2     | 9.2                          | 3.4    | 9                   | 3.4                           | 30 sec irregular rhythm without p waves or 2x episodes between 10-29 sec                         | 218        | 3               |     |
| Pioietti et al. (2016) 54    | 65747 | Belgium   | Belgian Heart Week screening                                                                          | Omron Heartscan HCG-801        | 30                          | 1                           | 0                       | 58                    | 41       | NR                       | 36      | 21     | 23      | 0.5                          | 20     | 20                  | 2                             | irregular R-R interval, no distinct p waves, variable atrial cycle length                        | 603        | 1.1             |     |
| Passenbrood et al. (2016) 55 | 3269  | Holland   | Influenza vaccination - opportunistic screening                                                       | MyDiagnostik                   | 60                          | 1                           | 0                       | 64.1                  | 49       | NR                       | NR      | NR     | NR      | 2.6                          | NR     | NR                  | NR                            | Cardiologist Interpretation x 2                                                                  | 37         | 1.1             |     |
| Engdahl et al. (2013) 56     | 848   | Sweden    | Community screening (75-76 yr olds) in Halmstad, Sweden                                               | Zenico                         | 30                          | 2                           | 14                      | 75                    | 43       | NR                       | 53      | 11     | NR      | 9.6                          | 4      | 10                  | 1.9                           | 30 sec duration of irregular rhythm or >= 2 episodes of 10 or more sec                           | 40         | 4.7             |     |
| Hendriks et al. (2013) 57    | 928   | Sweden    | GP practices                                                                                          | Zenico                         | 10                          | 2                           | 28                      | 69.8                  | 50       | NR                       | 90.3    | 31.6   | 19.8    | 0                            | 3.7    | 8.6                 | 2                             | 10 sec irregular rhythm without p waves                                                          | 35         | 3.8             |     |
| Hendriks et al. (2014) 67    | 95    | Sweden    | Referred for presyncope/palpitations                                                                  | Zenico                         | 30                          | 2                           | 28                      | 54.1                  | 44       | NR                       | 28.4    | 1.1    | 8.4     | 0                            | 0      | 6.3                 | 1                             | 30 sec irregular rhythm without p waves                                                          | 9          | 9.5             |     |
| Chan et al. (2016) 15        | 1013  | Hong Kong | Patients ≥ 65 yrs with hypertension or diabetes                                                       | Alive Cor                      | 60                          | 1                           | 0                       | 68.4                  | 47       | NR                       | 90.4    | 36.6   | 16.2    | 2.2                          | 4.4    | 10.5                | 3                             | Cardiologist Interpretation                                                                      | 5          | 0.5             |     |
| Sobocinski et al. (2012) 66  | 249   | Sweden    | Patients post TIA/stroke                                                                              | Zenico                         | 10                          | 2                           | 30                      | 72                    | 57       | NR                       | 65      | 16     | 20      | 0                            | 4      | 25                  | 3                             | irregular rhythm of minimum 10 sec without visible p waves                                       | 15         | 6               |     |
| Delwa et al. (2009) 14       | 606   | Sweden    | Community event                                                                                       | Zenico                         | 10                          | 1                           | 0                       | NR                    | 64       | NR                       | NR      | NR     | NR      | NR                           | NR     | NR                  | NR                            | irregular rhythm without visible p waves                                                         | 6          | 1               |     |
| Kumar et al. (2017) 60       | 204   | Australia | Community - ≥ 65 yrs with 1 or more risk factor for heart failure                                     | Remon RM-100                   | 60                          | 5                           | 7                       | 70.1                  | 51       | 29.1                     | 72.1    | 56.4   | 5.9     | 0                            | 0      | NR                  | 3                             | 30 sec duration of irregular rhythm with absent p waves                                          | 20         | 9.8             |     |
| Hendriks et al. (2017) 58    | 201   | Sweden    | Patients referred to respiratory clinics with suspicion of obstructive sleep apnoea                   | Zenico                         | 30                          | 2                           | 14                      | 56                    | 69       | 30                       | 51      | 10     | 9.2     | 0                            | 4.6    | 3.1                 | NR                            | Irregular supraventricular extra systoles in series for 30 sec                                   | 13         | 6.5             |     |
| Caes et al. (2011) 61        | 10758 | Belgium   | Community heart rhythm screening program through medical centres                                      | Omron Heartscan HCG-801        | 30                          | 1                           | 0                       | 59                    | 38       | NR                       | 30.6    | 8.6    | 12.2    | 7.2                          | 7.2    | 5.4                 | 1                             | Irregular RR intervals, absence of p waves and variable atrial cycle length (when visible)       | 167        | 1.6             |     |
| Samol et al. (2012) 62       | 132   | Germany   | Large proportion post stroke/TIA. Also recruited from diabetes, hypertension and dyslipidemia clinics | Omron Heartscan HCG-801        | 30                          | 1                           | 0                       | 64                    | 58       | NR                       | 67      | 27     | NR      | 0                            | 3      | 49                  | NR                            | Cardiologist Interpretation x 2                                                                  | 7          | 5.3             |     |
| Balpaglia et al. (2016) 63   | 855   | UK        | Community shopping centre screening                                                                   | MyDiagnostik                   | 15                          | 1                           | 0                       | NR                    | NR       | NR                       | NR      | NR     | NR      | NR                           | NR     | NR                  | NR                            | NR                                                                                               | NR         | 7               | 0.8 |
| Chan et al. (2016) 59        | 13122 | Hong Kong | Nationwide community screening program                                                                | Alive Cor                      | 30                          | 1                           | 0                       | 64.7                  | 29       | 23.7                     | 38.2    | 14.8   | 2.2     | 0                            | 0.7    | 2.8                 | NR                            | Software algorithm definition with minimum of 30 sec                                             | 101        | 0.8             |     |
| Chan et al. (2017) 65        | 10735 | Hong Kong | Nationwide community screening program                                                                | Alive Cor                      | 30                          | 1                           | 0                       | NR                    | NR       | NR                       | NR      | NR     | NR      | 1.2                          | NR     | NR                  | NR                            | Cardiologist interpretation (≥ 30 sec)                                                           | 74         | 0.7             |     |
| Hancock et al. (2017) 64     | 501   | UK        | Community based with individuals > 65 yrs with CHADS-VASC score ≥ 2                                   | Alive Cor                      | 30                          | 2x per week                 | 365                     | 72.6                  | 48       | NR                       | 54      | 26     | 14      | 0                            | 1.0    | 7.0                 | 3.0                           | 30 second duration of an irregular rhythm without P waves                                        | 19         | 3.8             |     |
| Gladstone et al. (2014) 18   | 277   | Canada    | Patients admitted with cryptogenic stroke                                                             | Holter                         | continuous                  | continuous                  | 1                       | 73.2                  | 56       | NR                       | 67      | 19.3   | 14.7    | 0                            | 7      | 12.6                | NR                            | 30 second or longer duration of irregular rhythm                                                 | 9          | 3.2             |     |
| Barthelemy et al. (2003) 19  | 60    | France    | Consecutive patients admitted with stroke/TIA                                                         | Holter                         | continuous                  | continuous                  | 1                       | 64.4                  | 55       | NR                       | 50      | 17     | NR      | 0                            | NR     | 27                  | NR                            | fibrillatory waves associated with irregular ventricular response ratio at least 30 sec duration | 8          | 13.3            |     |

Atrial fibrillation detection using portable electrocardiographic monitoring devices.; Page 10

1  
2  
3  
4  
5  
6  
7  
8  
9  
10  
11  
12  
13  
14  
15  
16  
17  
18  
19  
20  
21  
22  
23  
24  
25  
26  
27  
28  
29  
30  
31  
32  
33  
34  
35  
36  
37  
38  
39  
40  
41  
42  
43  
44  
45  
46  
47

|    |                              |      |             |                                                                         |        |            |            |   |      |    |      |      |      |      |     |      |      |                                                                                                                                                            |                                                                                                                                                                                                               |     |      |
|----|------------------------------|------|-------------|-------------------------------------------------------------------------|--------|------------|------------|---|------|----|------|------|------|------|-----|------|------|------------------------------------------------------------------------------------------------------------------------------------------------------------|---------------------------------------------------------------------------------------------------------------------------------------------------------------------------------------------------------------|-----|------|
| 4  | Jabaudon et al. (2004) 20    | 149  | Switzerland | Consecutive patients admitted with stroke/TIA                           | Holter | continuous | continuous | 1 | 66.9 | 68 | NR   | 58   | 16.7 | 16.8 | 4.7 | NR   | 16.8 | NR                                                                                                                                                         | NR                                                                                                                                                                                                            | 7   | 4.7  |
| 6  | oudstaal et al. (1986) 21    | 100  | Holland     | Retrospective study of 100 patients admitted with stroke/TIA            | Holter | continuous | continuous | 1 | 60.9 | 74 | NR   | NR   | NR   | 41   | NR  | NR   | NR   | NR                                                                                                                                                         | NR                                                                                                                                                                                                            | 5   | 5    |
| 9  | Hornig et al. (1996) 22      | 268  | Germany     | Consecutive patients admitted with stroke/TIA                           | Holter | continuous | continuous | 1 | 59.1 | 61 | NR   | 43.7 | 34   | NR   | NR  | 14.9 | 45   | NR                                                                                                                                                         | NR                                                                                                                                                                                                            | 10  | 3.3  |
| 10 | Pisos et al. (2012) 23       | 496  | Germany     | Patients admitted with stroke/TIA                                       | Holter | continuous | continuous | 1 | 69   | 62 | NR   | 78.8 | 24.6 | NR   | NR  | NR   | 22.2 | 3                                                                                                                                                          | Cardiologist interpretation ( $\geq 30$ sec)                                                                                                                                                                  | 14  | 2.8  |
| 12 | uchert et al. (1999) 24      | 82   | Germany     | Consecutive patients admitted with stroke/TIA                           | Holter | continuous | continuous | 3 | 59.7 | 57 | NR   | 36.5 | NR   | 17.1 | NR  | NR   | NR   | NR                                                                                                                                                         | Small irregular baseline undulations of variable amplitudes and morphology at a rate $>350$ /min with an irregular ventricular response for at least 1 min.                                                   | 5   | 6    |
| 14 | jaer et al. (2009) 25        | 241  | Switzerland | Consecutive patients admitted with stroke/TIA                           | Holter | continuous | continuous | 1 | 68.7 | 59 | NR   | 76   | 25   | 41   | 7   | NR   | 4.6  | NR                                                                                                                                                         | NR                                                                                                                                                                                                            | 0   | 0    |
| 16 | baer et al. (2004) 26        | 425  | Switzerland | Retrospective review of patients post stroke/TIA with Holter monitoring | Holter | continuous | continuous | 1 | 67.4 | 61 | NR   | NR   | NR   | NR   | NR  | NR   | 1.2  | NR                                                                                                                                                         | Self-terminating sequence of $>30$ seconds of irregular RR intervals and the presence of fibrillatory P waves.                                                                                                | 9   | 2.1  |
| 18 | Shafiqat et al. (2004) 27    | 465  | Pakistan    | Retrospective review of consecutive patients admitted with stroke/TIA   | Holter | continuous | continuous | 1 | 66.8 | 56 | NR   | NR   | NR   | NR   | NR  | NR   | NR   | NR                                                                                                                                                         | NR                                                                                                                                                                                                            | 5   | 2.4  |
| 21 | Lazzaro et al. (2012) 28     | 133  | USA         | Consecutive patients admitted with stroke/TIA                           | Holter | continuous | continuous | 1 | 63.1 | 50 | NR   | 70   | 29.3 | 18.8 | 0   | NR   | 2.3  | NR                                                                                                                                                         | Supraventricular tachyarrhythmia characterized by uncoordinated atrial activation with fibrillatory waves varying in amplitude, shape, and timing, replacing consistent P waves and with a duration $>30$ sec | 8   | 6    |
| 24 | Grand et al. (2013) 29       | 1135 | Germany     | Patients admitted in 7 German centres with stroke/TIA                   | Holter | continuous | continuous | 3 | 67   | 55 | 27.4 | 20.4 | 7.3  | 0    | 5.8 | 17.4 | NR   | $\geq 1$ period of $>30$ sec duration of an absolute arrhythmia without detectable P waves and without a ptern more consistent with an alternate diagnosis | 49                                                                                                                                                                                                            | 4.3 |      |
| 26 | Stahrenberg et al. (2010) 30 | 224  | Germany     | Consecutive patients admitted with stroke/TIA                           | Holter | continuous | continuous | 7 | 68   | 58 | 27.6 | 72.9 | 22.3 | 14.8 | 0   | 5.2  | 16.2 | NR                                                                                                                                                         | 2 x Cardiologist interpretation of software algorithm detection of events                                                                                                                                     | 28  | 12.5 |
| 28 | itter et al. (2013) 31       | 60   | Germany     | Patients admitted with cryptogenic stroke                               | Holter | continuous | continuous | 7 | 61.8 | 57 | NR   | 70   | 11.7 | 13.3 | NR  | 0    | NR   | 4                                                                                                                                                          | Cardiologist interpretation ( $> 30$ sec)                                                                                                                                                                     | 1   | 1.7  |
| 29 | Higgins et al. (2013) 32     | 50   | Scotland    | Patients admitted with stroke/TIA                                       | Holter | continuous | continuous | 7 | 67.1 | 48 | NR   | 56   | 8    | 16   | 0   | NR   | NR   | NR                                                                                                                                                         | Cardiologist interpretation ( $> 30$ sec)                                                                                                                                                                     | 4   | 8    |
| 30 | rikx et al. (2014) 67        | 95   | Sweden      | Patients investigated for palpitations and presyncope                   | Holter | continuous | continuous | 1 | 54.1 | 42 | NR   | 28.4 | 1.1  | 8.4  | 0   | 0    | 6.3  | 1                                                                                                                                                          | 30 sec irregular rhythm without p waves                                                                                                                                                                       | 2   | 2.1  |
| 32 | kkar et al. (2014) 33        | 52   | India       | Consecutive patients admitted with stroke/TIA                           | Holter | continuous | continuous | 1 | 59.5 | 77 | NR   | 51.9 | 23.1 | 15.4 | 0   | 1.7  | 7.7  | NR                                                                                                                                                         | 30 sec irregular rhythm without p waves                                                                                                                                                                       | 3   | 5.8  |
| 34 | Wachter et al. (2017) 34     | 198  | Germany     | Consecutive patients admitted with stroke/TIA                           | Holter | continuous | continuous | 1 | 73.2 | 62 | NR   | 80.7 | 26.4 | 9.1  | 0   | 4.6  | 21.7 | 4.8                                                                                                                                                        | $>30$ seconds rhythm with irregular RR intervals and the presence of fibrillatory P waves.                                                                                                                    | 9   | 5    |
| 35 | hbinger et al. (2012) 35     | 192  | Germany     | Patients admitted with stroke/TIA                                       | Holter | continuous | continuous | 1 | NR   | NR | NR   | NR   | NR   | NR   | NR  | NR   | NR   | NR                                                                                                                                                         | NR                                                                                                                                                                                                            | 2   | 1    |
| 37 | Madramy et al. (2010) 36     | 426  | Canada      | Retrospective review of patients post stroke/TIA with Holter monitoring | Holter | continuous | continuous | 1 | 64.9 | 48 | NR   | 58.2 | 14.1 | 14.1 | 0   | 1.6  | 6.3  | NR                                                                                                                                                         | Irregular ventricular response in the absence of p-waves or with fibrillatory waves                                                                                                                           | 11  | 2.5  |
| 39 | ocinski et al. (2012) 66     | 249  | Sweden      | Consecutive patients admitted with stroke/TIA                           | Holter | continuous | continuous | 1 | 72   | 57 | NR   | 65   | 16   | 20   | 0   | 4    | 25   | 3                                                                                                                                                          | irregular rhythm of minimum 10 sec without visible p waves                                                                                                                                                    | 5   | 2    |
| 42 | Dangayach et al. (2011) 37   | 51   | USA         | Retrospective audit of patients admitted with cryptogenic stroke        | Holter | continuous | continuous | 2 | 58.2 | 43 | NR   | 35.3 | 16   | 15.7 | 7.4 | NR   | NR   | NR                                                                                                                                                         | NR                                                                                                                                                                                                            | 15  | 29.4 |

|    |                                  |                                            |                        |                                                                            |                    |                               |            |   |      |    |    |      |      |      |      |     |      |    |                                                                                        |      |      |
|----|----------------------------------|--------------------------------------------|------------------------|----------------------------------------------------------------------------|--------------------|-------------------------------|------------|---|------|----|----|------|------|------|------|-----|------|----|----------------------------------------------------------------------------------------|------|------|
| 4  | Unalp et. al. (2006) 38          | 26                                         | Turkey                 | Patients admitted with ischaemic stroke                                    | Holter             | continuous                    | continuous | 1 | 66   | 69 | NR | 61   | 26   | 31   | NR   | NR  | NR   | NR | NR                                                                                     | 11   | 42.3 |
| 5  | Fonseca et. al. (2013) 39        | 80                                         | Portugal               | Patients admitted with cryptogenic stroke                                  | Holter             | continuous                    | continuous | 1 | 69.3 | 53 | NR | 71.3 | 28.8 | 11.3 | NR   | NR  | 22.5 | NR | NR                                                                                     | 17   | 21   |
| 7  | Manina et. al. (2014) 40         | 114                                        | Italy                  | Patients admitted with cryptogenic stroke                                  | Holter             | continuous                    | continuous | 4 | 63.1 | NR | NR | 52.6 | 9.6  | NR   | NR   | NR  | NR   | NR | 29                                                                                     | 25.4 |      |
| 9  | Tagawa et. al. (2007) 41         | 308                                        | Japan                  | Consecutive patients admitted with ischaemic stroke                        | Holter             | continuous                    | continuous | 1 | 72.6 | 60 | NR | 70.1 | 25.3 | NR   | 20.4 | NR  | NR   | NR | Irregular ventricular response in the absence of p waves or with fibrillatory waves    | 26   | 8.4  |
| 11 | Shibazaki et. al. (2012) 42      | 536                                        | Japan                  | Consecutive patients admitted with ischaemic stroke                        | Holter             | continuous                    | continuous | 1 | 72.4 | 64 | NR | 65.9 | 25.7 | 9.8  | NR   | 0.3 | NR   | NR | NR                                                                                     | 12   | 2.2  |
| 13 | Van de Broecke et. al. (2004) 43 | 136                                        | Belgium                | Retrospective audit of patients admitted with ischaemic stroke             | Holter             | continuous                    | continuous | 1 | 68   | 52 | NR | NR   | NR   | NR   | NR   | NR  | NR   | NR | NR                                                                                     | 7    | 5.1  |
| 15 | Yogawa et. al. (2013) 44         | 68                                         | Japan                  | Consecutive patients admitted with ischaemic stroke                        | Holter             | continuous                    | continuous | 1 | 69.9 | 54 | NR | 66.2 | 14.7 | NR   | NR   | NR  | NR   | NR | irregular and uncoordinated atrial electrical activity on surface ECG lasting > 30 sec | 17   | 25   |
| 17 | Attmuri et. al. (2012) 45        | 140                                        | Australia              | Retrospective audit of patients admitted with ischaemic stroke/TIA         | Holter             | continuous                    | continuous | 1 | NR   | NR | NR | 65   | 20   | 37.1 | 18.6 | NR  | NR   | NR | NR                                                                                     | 12   | 8.6  |
| 19 | Salvatori et. al. (2015) 46      | 274                                        | Italy                  | Cohort study of patients ≥ 65 yrs with hypertension in multiple GP clinics | Holter             | continuous                    | continuous | 2 | 70   | 54 | NR | 100  | 15   | 9    | 7    | 4   | 2.2  | NR | Cardiologist interpretation                                                            | 4    | 1.5  |
| 21 | Beaulieu-Boire et. al. (2013) 47 | 284                                        | Canada                 | Consecutive patients admitted with stroke/TIA                              | Holter             | continuous                    | continuous | 1 | 70.6 | 52 | NR | 68.7 | 26.7 | 27.4 | NR   | 2.2 | 22.3 | NR | Cardiologist interpretation                                                            | 18   | 6.3  |
| 23 | Özgan et. al. (2011) 48          | 400                                        | Turkey                 | Retrospective review of patients admitted post stroke                      | Holter             | continuous                    | continuous | 1 | NR   | NR | NR | NR   | NR   | NR   | NR   | NR  | NR   | NR | NR                                                                                     | 40   | 10   |
| 25 | Wen et. al. (2008) 49            | 126                                        | Canada                 | Retrospective review of patients admitted post stroke                      | Holter             | continuous                    | continuous | 1 | NR   | NR | NR | NR   | NR   | NR   | 7    | NR  | NR   | NR | NR                                                                                     | 9    | 7.1  |
| 27 | Suissa et. al. (2012) 50         | 354                                        | France                 | Consecutive patients admitted with ischaemic stroke                        | Holter             | continuous                    | continuous | 1 | 62.4 | 57 | NR | 51.1 | 18.6 | NR   | 0    | NR  | NR   | NR | Cardiologist interpretation                                                            | 2    | 0.6  |
| 28 | Philhahrt et. al. (2013) 51      | 224                                        | Germany                | Patients admitted with ischaemic stroke                                    | Holter             | continuous                    | continuous | 7 | 68.5 | 59 | NR | 73.2 | 22.3 | 15.2 | NR   | 5.4 | 24.1 | NR | >30 second irregular rhythm                                                            | 29   | 12.9 |
| 30 | Atrial Fibrillation              | BMI – Body Mass Index (kg/m <sup>2</sup> ) | DM – Diabetes Mellitus | HF – Heart Failure                                                         | HTN - Hypertension | IHD – Ischaemic Heart Disease |            |   |      |    |    |      |      |      |      |     |      |    |                                                                                        |      |      |

**Table 1 – Summary of included trials investigating AF detection using single lead ECG devices or Holter Monitoring**

1  
2  
3 **Overall AF detection.** The combined AF detection rate using single lead ECG monitoring  
4 (n=117,436 from 18 studies) was 1.7% (95% CI 1.4% – 2.1%). The cumulative AF detection rate  
5 using continuous (Holter) monitoring (n=8498 from 36 studies) was 5.5% (95% CI 4.4% – 6.6%).  
6  
7 There was significant heterogeneity between studies ( $I^2 = 94%$  for single lead ECG monitoring, 87%  
8 for Holter monitoring). The overall new AF detection rate is presented in Figure 2.  
9  
10  
11

12 **Comparison of multiple intermittent monitoring to 24 hour Holter.** There was significant  
13 variation in the monitoring time using both single lead and Holter monitoring which contributed to  
14 the difference in the cumulative detection rate seen in Figure 2. Figure 3 compares the detection rate  
15 of multiple intermittent single lead recordings to 24-hour continuous monitoring, which is used  
16 routinely in clinical practice. There were 8 studies (n=10,199, mean weighted age 68.8±8.4 years  
17 from 6 studies, 47% male from 8 studies) that performed multiple intermittent single lead ECG  
18 recordings and 27 studies (n=6284, mean weighted age 67.8±5.1 years from 23 studies, 58% male  
19 from 23 studies) that used 24-hour Holter monitoring. From the data available, the multiple  
20 intermittent ECG group had a lower AF risk to the 24-hour Holter group (hypertension – 55% (n=8  
21 studies) vs 65% (n=20 studies), diabetes mellitus – 15% (n=8 studies) vs 22% (n=20 studies), heart  
22 failure – 3.3% (n=8 studies) vs 3.9% (n=11 studies), ischemic heart disease – 11% (n=6 studies) vs  
23 19% (n=15 studies) and previous stroke/TIA – 9% (n=7 studies) vs 16% (n=15 studies))  
24 respectively. The combined AF detection rate was 4.8% (95% CI 3.6–6.0%) using multiple  
25 intermittent ECG recordings. The cumulative AF detection rate using 24-hour Holter monitoring was  
26 4.6% (95% CI 3.5–5.7%).  
27  
28  
29  
30  
31  
32  
33  
34  
35  
36  
37  
38  
39  
40  
41

42 **Association between monitoring time and AF detection.** Using single lead ECG devices, we  
43 found a moderate linear relationship between the total monitoring time and AF detection rate  
44 ( $\beta=0.13$ ,  $R^2 = 0.42$ ). Using this formula, we noted that approximately 19 minutes of total intermittent  
45 monitoring produced similar AF detection to 24-hour continuous monitoring (Figure 4). The study  
46 by Halcox et. al. was an outlier, with a much lower AF detection rate than other studies (3.8% from  
47 52 minutes of total monitoring) and this reduced the linear correlation between total monitoring time  
48 and AF detection rate<sup>64</sup>. Exclusion of these data led to a stronger linear relationship ( $\beta=0.26$ ,  $R^2 =$   
49  
50  
51  
52  
53  
54  
55  
56  
57  
58  
59  
60

0.80) and a much lower total intermittent monitoring time required (12 min) to produce a similar AF detection rate to 24 hour Holter monitoring.

**Meta-regression.** Sources of heterogeneity in the 18 studies using single lead ECG monitoring were investigated using meta-regression (Table 2). Monitoring time per participant ( $\beta=0.11$ , 95% CI 0.04-0.18,  $p=0.005$ ) and body mass index ( $\beta=1.1$ , 95% CI 0.58-1.5,  $p=0.01$ ) were associated with AF detection.

| Variable                              | Number of studies | $\beta$ (95% C.I)    | P value |
|---------------------------------------|-------------------|----------------------|---------|
| Age (years)                           | 15                | 0.00 (-0.22 – 0.24)  | 0.95    |
| Monitoring time per participant (min) | 18                | 0.11 (0.04 – 0.18)   | 0.005   |
| Body Mass Index (kg/m <sup>2</sup> )  | 4                 | 1.1 (0.58 – 1.5)     | 0.01    |
| CHADS Score (%)                       | 11                | -0.13 (-2.6 – 2.4)   | 0.91    |
| Hypertension (%)                      | 14                | 0.01 (-0.08 – 0.10)  | 0.75    |
| Previous diagnosis of AF (%)          | 16                | -0.13 (-0.50 – 0.24) | 0.46    |
| Ischaemic Heart Disease (%)           | 12                | -0.10 (-0.42 – 0.21) | 0.48    |
| Previous stroke (%)                   | 13                | 0.06 (-0.09 – 0.19)  | 0.45    |
| Male gender                           | 16                | 0.10 (-0.04 – 0.24)  | 0.16    |

**Table 2 – Meta Regression Analysis for AF detection (Single lead ECG studies)**

**Sensitivity Analysis.** A number of outlier studies were observed in the meta-analysis that could influence the cumulative AF detection rate.<sup>37-40 44</sup> Removal of these outlier studies resulted in a reduction in the overall AF detection rate in all Holter studies (table 3) and for 24 hour Holter studies (table 4). When these outlier studies were removed the overall AF detection rate for 24 hour Holter was 3.86% (95% C.I 2.88% – 4.83%), much lower than the detection rate by multiple intermittent ECG recordings using portable single lead devices (4.78%, 95% C.I 3.58% – 5.97%). A cumulative meta-analysis (figure 5) did not show any significant variation in the AF detection rate

| Study Omitted            | AF detection rate (%) in remainder | 95% C.I (%) |
|--------------------------|------------------------------------|-------------|
| Dangayach et. al. (2011) | 5.27                               | 4.17 – 6.38 |
| Fonseca et. al. (2013)   | 5.26                               | 4.15 – 6.36 |
| Gunalp et. al. (2006)    | 5.32                               | 4.21 – 6.42 |
| Manina et. al. (2014)    | 5.11                               | 4.03 – 6.20 |
| Yadogawa et. al. (2013)  | 5.25                               | 4.14 – 6.35 |
| All studies excluded     | 4.31                               | 3.36 – 5.26 |

over time using either Holter or single lead ECG monitoring.

**Table 3 – Outlier studies omitted (all Holter studies) to assess the change to the overall AF detection rate**

| Study Omitted           | AF detection rate (%) in remainder | 95% C.I (%) |
|-------------------------|------------------------------------|-------------|
| Fonseca et. al. (2013)  | 4.30                               | 3.21 – 5.39 |
| Gunalp et. al. (2006)   | 4.39                               | 3.30 – 5.47 |
| Yadogawa et. al. (2013) | 4.30                               | 3.22 – 5.38 |
| All studies excluded    | 3.86                               | 2.88 – 4.83 |

**Table 4 – Outlier studies omitted (24 hour Holter) to assess the change to the overall AF detection rate**

**Publication bias.** Publication bias was explored using a funnel plot of all included studies (Supplemental Figure 1). There was significant publication bias in both single lead ECG device and Holter monitoring studies (Egger test,  $p=0.003$  and  $p<0.001$  respectively).

**Quality of studies.** A summary of the quality analysis (Supplemental Table 3) showed that overall quality of reporting was moderate. All studies described the primary objective of the trial and included a summary of the main findings. Detailed comorbidities of the study participants were only adequately reported in 28/52 (54%), and limitations were discussed in 35/52 (67%) of studies. Most had a very selective patient population, 31/52 (60%) were post stroke/TIA cohorts.

## Discussion

Our study is the only systematic review that we are aware of that has studied the overall AF detection rate of single lead portable ECG devices. The results of our systematic review suggest a linear relationship between monitoring time per patient and AF detection rate. Single timepoint screening has an approximate 1% AF detection rate which can be increased to around 5% when



1  
2  
3 multiple recordings are performed. We noted that approximately 19 minutes of intermittent  
4 monitoring produced similar detection rates to conventional 24 hours continuous Holter monitoring.

5  
6 **Early diagnosis of AF:** AF creates a significant burden on both patients as well as the health care  
7 system. AF will continue to rise in incidence and the costs to the health care system will continue to  
8 increase, due to aging, sedentariness, and the prevalence of obesity and the metabolic syndrome.<sup>3 68</sup>

9  
10 Early diagnosis offers the possibility for early initiation of treatment which may reduce the  
11 occurrence of the complications which may lead to reduced hospital admissions and associated  
12 health care costs. Early treatment for AF can be achieved in different ways. Patients with subclinical  
13 AF have an increased risk of stroke and cardiovascular events, like those with established AF.<sup>12 69</sup>

14  
15 Anticoagulation may help reduce the incidence of stroke in this cohort.

16  
17 The close relationship between metabolic syndrome and AF has encouraged research into the  
18 benefits of lifestyle intervention. Aggressive lifestyle intervention in patients with AF undergoing  
19 catheter ablation has been reported to lead to a reduction in symptom burden, improved quality of  
20 life and the need for repeat ablation procedures.<sup>10</sup> It remains to be tested whether initiation of  
21 lifestyle intervention and aggressive risk factor modification following the early diagnosis of AF  
22 may be associated with positive LA remodeling and reduction of disease progression. Such a process  
23 may lead to additional health benefits, including reduction in cardiovascular risk and improvement  
24 in exercise capacity.

25  
26 **AF screening and feasibility.** AF is a leading cause of stroke and heart failure in the community. As  
27 well as an association with increased all-cause mortality, it is associated with reduced quality of life.  
28 The availability of preventive therapies, including anticoagulation, has led to increasing recognition  
29 of the importance of AF screening for early diagnosis. However, AF screening shares the limitations  
30 of screening with other diagnostic tests. The screening tool must have high sensitivity, and needs to  
31 be inexpensive and cost effective. We also need to minimize and have a method of addressing false  
32 positives. Current guidelines recommend opportunistic screening using pulse palpation and 12 lead  
33 ECG.<sup>11</sup> In a previous systematic review this was associated with a new AF detection rate of  
34 approximately 1%.<sup>5</sup> Pulse palpation may be non-specific in patients with other irregular rhythms  
35 such as ventricular ectopy, and 12 lead ECG is only able to capture a single timepoint for screening.  
36  
37

1  
2  
3 There are multiple other methods for AF detection. Continuous Holter monitoring is probably the  
4 most commonly used in clinical practice, especially in stroke cohorts. It has the potential advantage  
5 of assessing heart rhythm throughout the day and may be useful in detecting nocturnal subclinical  
6 AF. However, the disadvantages include the cost of Holter monitoring (especially for mass  
7 screening), the inconvenience of leads and electrodes (which may affect compliance), and typical  
8 limitation to 1-2 days of capture (as extended periods are more cumbersome and less cost-effective.  
9 Other event recorders are again expensive and limited to symptomatic patients. Extended period  
10 monitoring using implantable devices have shown promise in the cryptogenic stroke population  
11 (where many have been diagnosed with paroxysmal AF),<sup>70</sup> but they are invasive and not feasible for  
12 mass screening.

13  
14  
15  
16  
17  
18  
19  
20  
21  
22  
23  
24  
25  
26  
27  
28  
29  
30  
31  
32  
33  
34  
35  
36  
37  
38  
39  
40  
41  
42  
43  
44  
45  
46  
47  
48  
49  
50  
51  
52  
53  
54  
55  
56  
57  
58  
59  
60  
Portable single lead ECG devices permit multiple 30-60 second recordings to be captured, and  
downloaded to a computer. These devices have several potential advantages over Holter monitoring.  
They are leadless and require finger contact (and are hence easy to use and acceptable to patients).  
They have a high degree of sensitivity for identifying AF.<sup>71-73</sup> Most interface with a web-based cloud  
system where ECG rhythms can be wirelessly transferred to clinicians, allowing rapid analysis and  
diagnosis. The development of automated algorithms to detect AF is helpful for mass screening. In  
two small studies they have demonstrated superior AF detection compared with 24 hour Holter  
monitoring.<sup>66 67</sup> Although screening using these portable devices are currently not in the latest AF  
guidelines, they may offer a feasible option for mass screening. Screening using these devices has  
been demonstrated to be cost effective.<sup>74 75</sup>

We noted a moderate linear association between monitoring time and AF detection rate. Single  
timepoint screening for 30-60 sec achieved an overall detection rate of approximately 1%. This is no  
better than what has been reported using pulse palpation or 12 lead ECG, hence does not add any  
incremental benefit in screening programs<sup>5</sup>. Multiple intermittent recordings improve AF detection;  
we found that at least 19 minutes of total monitoring should be performed to achieve detection rates  
similar to 24 Holter monitoring.

The linear relationship between monitoring time and AF detection rate ( $R^2=0.80$ ) and the  
reproduction of AF detection rates of 24 hour Holter monitoring with only 12 minutes of intermittent

1  
2  
3 monitoring was possible in our study only after exclusion of an outlier.<sup>64</sup> Despite the inclusion of  
4 elderly participants with at least one risk factor for AF, the use of a validated single lead ECG device  
5 and a prolonged monitoring period, that study had a lower AF detection rate (3.8%) than the  
6 remaining studies, even using a shorter monitoring period.<sup>53 56 57</sup> Relatively low rates of adherence  
7 (only approximately 25% completed 2 x 30 second ECG recordings every week for the full year of  
8 monitoring) may be a potential explanation for the lower AF detection rate noted.<sup>64</sup>  
9  
10  
11  
12  
13

14 **Limitations:** There are several challenges inherent in this meta-analysis of studies investigating AF  
15 detection. The most important is the target screening population. Most studies did not report the  
16 CHADS or CHA<sub>2</sub>DS<sub>2</sub>-VASC score, a history of previous stroke, or other co-morbidities.  
17 Consequently, it was difficult to ascertain if the risk profiles of patients in these studies were  
18 equivalent. Most Holter monitoring studies were performed in the stroke population – which is likely  
19 a population with higher AF risk than many studies using portable ECG devices, which recruited  
20 mainly healthy participants or those with AF risk factors from the community. The significant  
21 heterogeneity amongst both Holter and portable ECG device studies make it difficult to perform  
22 direct comparisons between both groups. The type/duration of monitoring and type of device used  
23 will also influence the overall AF detection rate and varied significantly between studies. There are  
24 several possible confounders which may not have been taken into account. The validity of the linear  
25 regression analysis comparing detection time and rate may be limited due to the significant  
26 differences in study population, study design and AF definitions. However, despite these limitations,  
27 the analysis may provide some important inferences into AF screening. Multiple intermittent ECG  
28 recordings achieved a similar AF detection rate to 24 hour Holter monitoring. This may suggest that  
29 in a similar cohort of patients with the same comorbidities, single lead intermittent monitoring may  
30 be superior for AF detection.  
31  
32  
33  
34  
35  
36  
37  
38  
39  
40  
41  
42  
43  
44  
45  
46  
47

48 Compared to 24-hour continuous monitoring, single lead portable ECG monitoring is more patient  
49 dependent. Good patient compliance is essential to obtain multiple readings across different  
50 timepoints which improves sensitivity. The analysis performed does not take into account patient  
51 compliance as this is difficult to assess and poorly reported across the individual studies. Most single  
52 lead device manufacturers have proprietary automated AF detection algorithms which were used for  
53  
54  
55  
56  
57  
58  
59  
60

1  
2  
3 diagnosis. Not all of these algorithms have had rigorous testing and comparison to a reference  
4 standard. It is also difficult to distinguish AF from other supraventricular tachycardias using single  
5 lead ECG devices as the P wave is often not readily discernible. The use of different automated  
6 algorithms makes AF definitions non-standardized and can potentially create issues with both over  
7 and underdiagnoses.  
8  
9

10  
11  
12 There are other limitations in this analysis. The efficacy of intermittent monitoring is critically  
13 dependent on AF burden and density. All studies varied in their monitoring period and strategy. The  
14 linear regression model used was able to determine a total intermittent monitoring time which  
15 produced similar AF detection rates to 24-hour continuous monitoring. However, it is difficult to  
16 translate the total monitoring time into an effective monitoring strategy. For example, we are unable  
17 to determine from our analysis if 12 x 60 second recordings over 12 consecutive days is different to  
18 2 x 60 second recordings daily for 6 consecutive days. The definitions of AF also vary between  
19 studies. Many are based on individual physician interpretation and criteria for diagnosis were not  
20 explicitly specified. The duration of AF varied from 10-30 seconds between studies, although a cut-  
21 off of 30 seconds, was the most widely adopted practice.  
22  
23  
24  
25  
26  
27  
28  
29  
30  
31

32 **Conclusion:** Single lead portable ECG devices may offer an efficient screening option for AF  
33 compared to 24 hr. Holter monitoring. Total monitoring time is related with AF detection and a total  
34 of 19 minutes may achieve a similar detection rate to 24 hour Holter monitoring.  
35  
36  
37  
38  
39  
40  
41  
42

43 **Contributors:** SR – Performed the literature search and analysis of individual studies. Involved in  
44 the statistical analysis, manuscript preparation and editing. TM – Is guarantor. Developed project  
45 idea/rationale. Involved in data analysis and manuscript preparation and editing. NN – Involved in  
46 data and statistical analysis as well as manuscript preparation and editing. DD – Performed the  
47 literature search and analysis of individual studies. Involved in the manuscript preparation and  
48 editing. DP – Involved in analysis of individual studies and statistical analysis. Involved in  
49  
50  
51  
52  
53  
54  
55  
56  
57  
58  
59  
60

1  
2  
3 manuscript preparation and editing. JK – involved in the project outline, data analysis, manuscript  
4  
5 preparation and editing.  
6  
7  
8

9 **Data Sharing:** Further figures and data available in supplementary material.  
10  
11  
12  
13  
14  
15  
16  
17  
18  
19  
20  
21  
22  
23  
24

### 25 **BMJ Group declaration of interests statement**

26 I have read and understood the BMJ Group policy on declaration of interests and declare the  
27 following interests: *[list them or state "none"]*.  
28

29 Date – 05/01/2018

30 Name:

31 Satish Ramkumar

32 Receives equipment and software support from Semacare Inc, a manufacturer of handheld ECG  
33 devices. The sponsors had no role in the design and conduct of the study, in the collection, analysis,  
34 and interpretation of the data, and in the preparation, review, or approval of the manuscript.  
35

36 Receives research scholarships from the Heart Foundation and Avant  
37

38 Thomas H Marwick

39 Receives equipment and software support from Semacare Inc, a manufacturer of handheld ECG  
40 devices. The sponsors had no role in the design and conduct of the study, in the collection, analysis,  
41 and interpretation of the data, and in the preparation, review, or approval of the manuscript.  
42

43 Nitesh Nerlekar – none

44 Daniel D'Souza – none

45 Derek J Pol – none

46 Jonathan M Kalman - none  
47  
48  
49  
50  
51  
52  
53  
54  
55  
56  
57  
58  
59  
60

## References

1. Krahn AD, Manfreda J, Tate RB, et al. The natural history of atrial fibrillation: incidence, risk factors, and prognosis in the Manitoba Follow-Up Study. *The American Journal of Medicine* 1995;98(5):476-84.
2. Vidaillet H, Granada JF, Chyou P-H, et al. A population-based study of mortality among patients with atrial fibrillation or flutter. *The American Journal of Medicine* 2002;113(5):365-70.
3. Kim MH, Johnston SS, Chu B-C, et al. Estimation of total incremental health care costs in patients with atrial fibrillation in the United States. *Circulation: Cardiovascular Quality and Outcomes* 2011;4(3):313-20.
4. Leyden JM, Kleinig TJ, Newbury J, et al. Adelaide stroke incidence study: declining stroke rates but many preventable cardioembolic strokes. *Stroke* 2013;44(5):1226-31. doi: 10.1161/strokeaha.113.675140 [published Online First: 2013/03/14]
5. Lowres N, Neubeck L, Redfern J, et al. Screening to identify unknown atrial fibrillation: A systematic review. *Thrombosis and Haemostasis* 2013;110(2):213-22. doi: <http://dx.doi.org/10.1160/TH13-02-0165>
6. Watanabe H, Tanabe N, Watanabe T, et al. Metabolic syndrome and risk of development of atrial fibrillation. *Circulation* 2008;117(10):1255-60.
7. Ball J, Thompson DR, Ski CF, et al. Estimating the current and future prevalence of atrial fibrillation in the Australian adult population. *Med J Aust* 2015;202(1):32-5.

- 1
- 2
- 3 8. Dagues N, Anastasiou-Nana M. Atrial Fibrillation and Obesity. *Journal of the American*
- 4 *College of Cardiology* 2010;55(21):2328-29. doi: 10.1016/j.jacc.2010.01.045
- 5
- 6 9. Sposato LA, Cipriano LE, Saposnik G, et al. Diagnosis of atrial fibrillation after stroke
- 7 and transient ischaemic attack: a systematic review and meta-analysis. *Lancet neurol*
- 8 2015;14(4):377-87. doi: [https://dx.doi.org/10.1016/S1474-4422\(15\)70027-X](https://dx.doi.org/10.1016/S1474-4422(15)70027-X)
- 9
- 10
- 11 10. Pathak RK, Middeldorp ME, Lau DH, et al. Aggressive risk factor reduction study for
- 12 atrial fibrillation and implications for the outcome of ablation: the ARREST-AF cohort
- 13 study. *Journal of the American College of Cardiology* 2014;64(21):2222-31.
- 14
- 15
- 16 11. Kirchhof P, Benussi S, Kotecha D, et al. 2016 ESC Guidelines for the management of
- 17 atrial fibrillation developed in collaboration with EACTS. *European Heart Journal*
- 18 2016;37(38):2893-962. doi: 10.1093/eurheartj/ehw210
- 19
- 20
- 21 12. Martinez C, Katholing A, Freedman SB. Adverse prognosis of incidentally detected
- 22 ambulatory atrial fibrillation. *Thrombosis and haemostasis* 2014;112(2):276-86.
- 23
- 24 13. Lau J, Lowres N, Neubeck L, et al. Performance of an automated iPhone ECG algorithm
- 25 to diagnose atrial fibrillation in a community AF screening program (search-AF). *Heart*
- 26 *Lung and Circulation* 2013;22:S205. doi: <http://dx.doi.org/10.1016/j.hlc.2013.05.488>
- 27
- 28
- 29 14. Doliwa PS, Frykman V, Rosenqvist M. Short-term ECG for out of hospital detection of
- 30 silent atrial fibrillation episodes. *Scandinavian Cardiovascular Journal* 2009;43(3):163-68.
- 31
- 32 15. Chan PH, Wong CK, Poh YC, et al. Diagnostic performance of a smartphone-based
- 33 photoplethysmographic application for atrial fibrillation screening in a primary care
- 34 setting. *Journal of the American Heart Association* 2016;5(e003428):e003428.
- 35
- 36
- 37 16. Moher D, Liberati A, Tetzlaff J, et al. Preferred reporting items for systematic reviews
- 38 and meta-analyses: the PRISMA statement. *PLoS medicine* 2009;6(7):e1000097.
- 39
- 40 17. Downs SH, Black N. The feasibility of creating a checklist for the assessment of the
- 41 methodological quality both of randomised and non-randomised studies of health care
- 42 interventions. *Journal of Epidemiology and Community Health* 1998;52(6):377-84. doi:
- 43 10.1136/jech.52.6.377
- 44
- 45
- 46 18. Gladstone DJ, Spring M, Dorian P, et al. Atrial fibrillation in patients with cryptogenic
- 47 stroke. *New England Journal of Medicine* 2014;370(26):2467-77.
- 48
- 49 19. Barthélémy JC, Féasson-Gérard S, Garnier P, et al. Automatic cardiac event recorders
- 50 reveal paroxysmal atrial fibrillation after unexplained strokes or transient ischemic attacks.
- 51 *Annals of Noninvasive Electrocardiology* 2003;8(3):194-99.
- 52
- 53
- 54 20. Jabaudon D, Sztajzel J, Sievert K, et al. Usefulness of ambulatory 7-day ECG monitoring
- 55 for the detection of atrial fibrillation and flutter after acute stroke and transient ischemic
- 56 attack. *Stroke* 2004;35(7):1647-51. doi: <https://dx.doi.org/10.1161/01.STR.0000131269.69502.d9>
- 57
- 58
- 59

- 1  
2  
3  
4 21. Koudstaal PJ, van Gijn J, Klootwijk A, et al. Holter monitoring in patients with transient  
5 and focal ischemic attacks of the brain. *Stroke* 1986;17(2):192-95.  
6  
7  
8 22. Hornig C, Haberbosch W, Lammers C, et al. Specific cardiological evaluation after focal  
9 cerebral ischemia. *Acta Neurologica Scandinavica* 1996;93(4):297-302.  
10  
11 23. Rizos T, Güntner J, Jenetzky E, et al. Continuous stroke unit electrocardiographic  
12 monitoring versus 24-hour Holter electrocardiography for detection of paroxysmal atrial  
13 fibrillation after stroke. *Stroke* 2012;43(10):2689-94.  
14  
15  
16 24. Schuchert A, Behrens G, Meinertz T. Impact of long-term ECG recording on the  
17 detection of paroxysmal atrial fibrillation in patients after an acute ischemic stroke. *Pacing*  
18 *Clin Electrophysiol* 1999;22(7):1082-4.  
19  
20 25. Schaer B, Sticherling C, Lyrer P, et al. Cardiological diagnostic work-up in stroke  
21 patients—a comprehensive study of test results and therapeutic implications. *European*  
22 *Journal of Neurology* 2009;16(2):268-73.  
23 26. Schaer B, Zellweger M, Cron T, et al. Value of routine Holter monitoring for the  
24 detection of paroxysmal atrial fibrillation in patients with cerebral ischemic events. *Stroke*  
25 2004;35(3):e68-e70.  
26  
27  
28 27. Shafqat S, Kelly P, Furie K. Holter monitoring in the diagnosis of stroke mechanism.  
29 *Internal Medicine Journal* 2004;34(6):305-09.  
30  
31  
32 28. Lazzaro MA, Krishnan K, Prabhakaran S. Detection of atrial fibrillation with concurrent  
33 holter monitoring and continuous cardiac telemetry following ischemic stroke and  
34 transient ischemic attack. *J Stroke Cerebrovasc Dis* 2012;21(2):89-93. doi:  
35 <https://dx.doi.org/10.1016/j.jstrokecerebrovasdis.2010.05.006>  
36  
37  
38 29. Grond M, Jauss M, Hamann G, et al. Improved detection of silent atrial fibrillation  
39 using 72-hour Holter ECG in patients with ischemic stroke. *Stroke* 2013;44(12):3357-64.  
40  
41  
42 30. Stahrenberg R, Weber-Kruger M, Seegers J, et al. Enhanced detection of paroxysmal  
43 atrial fibrillation by early and prolonged continuous holter monitoring in patients with  
44 cerebral ischemia presenting in sinus rhythm. *Stroke* 2010;41(12):2884-88. doi:  
45 <http://dx.doi.org/10.1161/STROKEAHA.110.591958>  
46  
47  
48 31. Ritter MA, Kochhauser S, Duning T, et al. Occult atrial fibrillation in cryptogenic stroke:  
49 detection by 7-day electrocardiogram versus implantable cardiac monitors. *Stroke*  
50 2013;44(5):1449-52. doi: <https://dx.doi.org/10.1161/STROKEAHA.111.676189>  
51  
52 32. Higgins P, MacFarlane PW, Dawson J, et al. Noninvasive cardiac event monitoring to  
53 detect atrial fibrillation after ischemic stroke: a randomized, controlled trial. *Stroke*  
54 2013;44(9):2525-31. doi: <https://dx.doi.org/10.1161/STROKEAHA.113.001927>  
55  
56  
57  
58  
59  
60



- 1  
2  
3 33. Thakkar S, Bagarhatta R. Detection of paroxysmal atrial fibrillation or flutter in patients  
4 with acute ischemic stroke or transient ischemic attack by Holter monitoring. *Indian Heart*  
5 *Journal* 2014;66(2):188-92.  
6  
7  
8 34. Wachter R, Gröschel K, Gelbrich G, et al. Holter-electrocardiogram-monitoring in  
9 patients with acute ischaemic stroke (Find-AF RANDOMISED): an open-label randomised  
10 controlled trial. *Lancet neurol* 2017;16(4):282-90.  
11  
12 35. Gumbinger C, Krumsdorf U, Veltkamp R, et al. Continuous monitoring versus  
13 HOLTER ECG for detection of atrial fibrillation in patients with stroke. *European Journal of*  
14 *Neurology* 2012;19(2):253-7. doi: <https://dx.doi.org/10.1111/j.1468-1331.2011.03519.x>  
15  
16  
17 36. Alhadramy O, Jeerakathil TJ, Majumdar SR, et al. Prevalence and predictors of  
18 paroxysmal atrial fibrillation on Holter monitor in patients with stroke or transient  
19 ischemic attack. *Stroke* 2010;41(11):2596-600. doi:  
20 <https://dx.doi.org/10.1161/STROKEAHA.109.570382>  
21  
22  
23 37. Dangayach NS, Kane K, Moonis M. Paroxysmal atrial fibrillation in cryptogenic stroke.  
24 *Therapeutics and Clinical Risk Management* 2011;7(1):33-37. doi:  
25 <http://dx.doi.org/10.2147/TCRM.S15079>  
26  
27  
28 38. Gunalp M, Atalar E, Coskun F, et al. Holter monitoring for 24 hours in patients with  
29 thromboembolic stroke and sinus rhythm diagnosed in the emergency department.  
30 *Advances in Therapy* 2006;23(6):854-60.  
31  
32  
33 39. Fonseca AC, Brito D, Pinho e Melo T, et al. N-terminal pro-brain natriuretic peptide  
34 shows diagnostic accuracy for detecting atrial fibrillation in cryptogenic stroke patients.  
35 *International Journal of Stroke* 2014;9(4):419-25. doi: <http://dx.doi.org/10.1111/ijs.12126>  
36  
37  
38 40. Manina G, Agnelli G, Becattini C, et al. 96 hours ECG monitoring for patients with  
39 ischemic cryptogenic stroke or transient ischaemic attack. *Intern* 2014;9(1):65-7. doi:  
40 <https://dx.doi.org/10.1007/s11739-012-0755-3>  
41  
42  
43 41. Tagawa M, Takeuchi S, Chinushi M, et al. Evaluating patients with acute ischemic  
44 stroke with special reference to newly developed atrial fibrillation in cerebral embolism.  
45 *Pacing and Clinical Electrophysiology* 2007;30(9):1121-28.  
46  
47  
48 42. Shibazaki K, Kimura K, Fujii S, et al. Brain natriuretic peptide levels as a predictor for  
49 new atrial fibrillation during hospitalization in patients with acute ischemic stroke. *The*  
50 *American Journal of Cardiology* 2012;109(9):1303-07.  
51  
52  
53 43. Vandenbroucke E, Thijs V. Diagnostic and therapeutic impact of ambulatory  
54 electrocardiography in acute stroke. *Acta Neurologica Belgica* 2004;104(1):27-31.  
55  
56  
57 44. Yodogawa K, Seino Y, Ohara T, et al. Prediction of atrial fibrillation after ischemic  
58 stroke using P-wave signal averaged electrocardiography. *Journal of Cardiology*  
59 2013;61(1):49-52.  
60

- 1  
2  
3  
4 45. Atmuri K, Hughes A, Coles D, et al. The role of cardiac disease parameters in predicting  
5 the results of Holter monitoring in patients with acute ischaemic stroke. *J Clin Neurosci*  
6 2012;19(7):965-68.  
7
- 8  
9 46. Salvatori V, Becattini C, Laureti S, et al. Holter monitoring to detect silent atrial  
10 fibrillation in high-risk subjects: the Perugia General Practitioner Study. *Intern*  
11 2015;10(5):595-601. doi: <https://dx.doi.org/10.1007/s11739-015-1241-5>  
12
- 13 47. Beaulieu-Boire I, Leblanc N, Berger L, et al. Troponin elevation predicts atrial  
14 fibrillation in patients with stroke or transient ischemic attack. *Journal of Stroke and*  
15 *Cerebrovascular Diseases* 2013;22(7):978-83. doi:  
16 <http://dx.doi.org/10.1016/j.jstrokecerebrovasdis.2012.01.008>  
17
- 18  
19 48. Dogan U, Dogan EA, Tekinalp M, et al. P-wave dispersion for predicting paroxysmal  
20 atrial fibrillation in acute ischemic stroke. *International Journal of Medical Sciences* 2012;9(1  
21 ):108.  
22
- 23 49. Douen AG, Pageau N, Medic S. Serial electrocardiographic assessments significantly  
24 improve detection of atrial fibrillation 2.6-fold in patients with acute stroke. *Stroke*  
25 2008;39(2):480-2. doi: <https://dx.doi.org/10.1161/STROKEAHA.107.492595>  
26
- 27 50. Suissa L, Bresch S, Lachaud S, et al. Optimal timing and duration of continuous ECG  
28 monitoring for detecting atrial fibrillation in stroke patients. *Archives of Cardiovascular*  
29 *Diseases Supplements* 2012;4:43-44.  
30
- 31  
32 51. Wohlfahrt J, Stahrenberg R, Weber-Kruger M, et al. Clinical predictors to identify  
33 paroxysmal atrial fibrillation after ischaemic stroke. *European Journal of Neurology*  
34 2014;21(1):21-7. doi: <https://dx.doi.org/10.1111/ene.12198>  
35
- 36  
37 52. Lowres N, Neubeck L, Salkeld G, et al. Feasibility and cost-effectiveness of stroke  
38 prevention through community screening for atrial fibrillation using iPhone ECG in  
39 pharmacies: The SEARCH-AF study. *Thrombosis and Haemostasis* 2014;111(6):1167-76. doi:  
40 <http://dx.doi.org/10.1160/TH14-03-0231>  
41
- 42 53. Svennberg E, Engdahl J, Al-Khalili F, et al. Mass screening for untreated atrial  
43 fibrillation: the STROKESTOP study. *Circulation* 2015;131:2176-84.  
44
- 45  
46 54. Proietti M, Mairesse GH, Goethals P, et al. A population screening programme for atrial  
47 fibrillation: a report from the Belgian Heart Rhythm Week screening programme. *Europace*  
48 2016;18:1779-86.  
49
- 50  
51 55. Kaasenbrood F, Hollander M, Rutten FH, et al. Yield of screening for atrial fibrillation in  
52 primary care with a hand-held, single-lead electrocardiogram device during influenza  
53 vaccination. *Europace* 2016;18(10):1514-20. doi: <http://dx.doi.org/10.1093/europace/euv426>  
54
- 55  
56 56. Engdahl J, Andersson L, Mirskaya M, et al. Stepwise Screening of Atrial Fibrillation in a  
57 75-Year-Old Population Clinical Perspective. *Circulation* 2013;127(8):930-37.  
58  
59

- 1  
2  
3  
4 57. Hendrikx T, Hörnsten R, Rosenqvist M, et al. Screening for atrial fibrillation with  
5 baseline and intermittent ECG recording in an out-of-hospital population. *BMC*  
6 *Cardiovascular Disorders* 2013;13(1):41.  
7
- 8  
9 58. Hendrikx T, Sundqvist M, Sandström H, et al. Atrial fibrillation among patients under  
10 investigation for suspected obstructive sleep apnea. *PloS One* 2017;12(2):e0171575.  
11
- 12 59. Chan Ny, Choy Cc. Screening for atrial fibrillation in 13 122 Hong Kong citizens with  
13 smartphone electrocardiogram. *Heart* 2017;103(1):24-31. doi:  
14 <http://dx.doi.org/10.1136/heartjnl-2016-309993>  
15
- 16  
17 60. Ramkumar S, Yang H, Wang Y, et al. The Role of Left Atrial and Ventricular Function in  
18 Prediction of Atrial Fibrillation: P2-19. *Journal of the American Society of Echocardiography*  
19 2017;30(6):B70.
- 20 61. Claes N, Goethals M, Goethals P, et al. Screening for Atrial Fibrillation (AF) in Belgium:  
21 A multicentre trial. *European Journal of Cardiovascular Prevention and Rehabilitation*  
22 2011;1):S30. doi: <http://dx.doi.org/10.1177/1741826711407000>  
23
- 24  
25 62. Samol A, Masin M, Gellner R, et al. Prevalence of unknown atrial fibrillation in patients  
26 with risk factors. *Europace* 2013;15(5):657-62.  
27
- 28  
29 63. Battipaglia I, Gilbert K, Hogarth AJ, et al. Screening for atrial fibrillation in the  
30 community using a novel ECG recorder. *Journal of Atrial Fibrillation* 2016;9(2):29-31.  
31
- 32 64. Halcox JP, Wareham K, Cardew A, et al. Assessment of Remote Heart Rhythm  
33 Sampling Using the AliveCor Heart Monitor to Screen for Atrial Fibrillation: The  
34 REHEARSE-AF Study. *Circulation* 2017:CIRCULATIONAHA. 117.030583.  
35
- 36  
37 65. Chan, Ny, Siu Cw, Choy Cc et. al. Effectiveness of community atrial fibrillation  
38 screening in over 10,000 citizens using smartphone electrocardiogram- The AFinder  
39 program. ESC Congress; 2017 29th August Barcelona.  
40
- 41  
42 66. Doliwa Sobocinski P, Änggårdh Rooth E, Frykman Kull V, et al. Improved screening for  
43 silent atrial fibrillation after ischaemic stroke. *EP Europace* 2012;14(8):1112-16.  
44
- 45  
46 67. Hendrikx T, Rosenqvist M, Wester P, et al. Intermittent short ECG recording is more  
47 effective than 24-hour Holter ECG in detection of arrhythmias. *BMC Cardiovascular*  
48 *Disorders* 2014;14(1):41.  
49
- 50  
51 68. Stewart S, Murphy N, Walker A, et al. Cost of an emerging epidemic: an economic  
52 analysis of atrial fibrillation in the UK. *Heart* 2004;90(3):286-92. doi: 10.1136/hrt.2002.008748  
53
- 54  
55 69. Healey JS, Connolly SJ, Gold MR, et al. Subclinical Atrial Fibrillation and the Risk of  
56 Stroke. *New England Journal of Medicine* 2012;366(2):120-29. doi: 10.1056/NEJMoa1105575  
57  
58  
59

- 1  
2  
3 70. Sanna T, Diener HC, Passman RS, et al. Cryptogenic stroke and underlying atrial  
4 fibrillation. *New England Journal of Medicine* 2014;370(26):2478-86. doi:  
5 <http://dx.doi.org/10.1056/NEJMoa1313600>  
6  
7  
8 71. Desteghe L, Raymaekers Z, Lutin M, et al. Performance of handheld electrocardiogram  
9 devices to detect atrial fibrillation in a cardiology and geriatric ward setting. *Europace*  
10 2016:euw025.  
11  
12 72. Williams J, Pearce K, Benett I, et al. The effectiveness of a mobile ECG device in  
13 identifying AF: sensitivity, specificity and predictive value. *British Journal of Cardiology*  
14 2015;22(2)  
15  
16  
17 73. Freedman SB, Lowres N. Asymptomatic atrial fibrillation: the case for screening to  
18 prevent stroke. *JAMA* 2015;314(18):1911-12.  
19 74. Aronsson M, Svennberg E, Rosenqvist M, et al. Cost-effectiveness of mass screening for  
20 untreated atrial fibrillation using intermittent ECG recording. *EP Europace* 2015;17(7):1023-  
21 29. doi: 10.1093/europace/euv083  
22  
23  
24 75. Jacobs MS, Kaasenbrood F, Postma MJ, et al. Cost-effectiveness of screening for atrial  
25 fibrillation in primary care with a handheld, single-lead electrocardiogram device in the  
26 Netherlands. *Europace* 2016:euw285.  
27  
28  
29  
30  
31  
32  
33  
34  
35  
36  
37  
38  
39  
40  
41  
42  
43  
44  
45  
46  
47  
48  
49  
50  
51  
52  
53  
54  
55  
56  
57  
58  
59  
60

**Figure Legends**

Figure 1 – Overview of inclusion and exclusion of studies based on the PRISMA flowchart

Figure 2 – Forest Plot showing the overall AF detection rate between single lead ECG devices and Holter monitoring

Figure 3 – Forest Plot comparing the AF detection rate between 24 hour Holter monitoring and performing multiple intermittent single lead ECG recordings

Figure 4 – Graph showing the linear relationship between total monitoring time and AF detection rate in single lead ECG devices

Figure 5 – Cumulative Meta-analysis showing minimal variation in AF detection over time using Holter and single lead ECG devices.

Supplementary Figure 1 – Funnel Plots for Holter monitoring and single lead ECG device studies

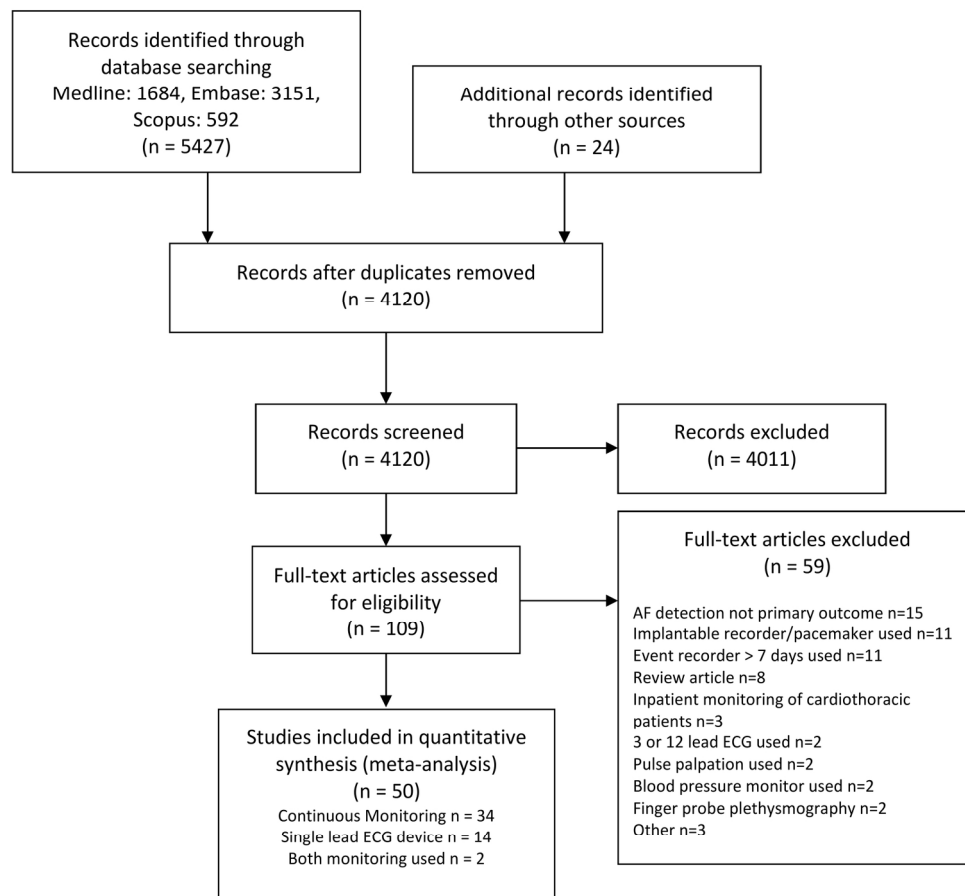

Figure 1

170x163mm (300 x 300 DPI)

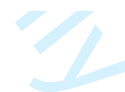

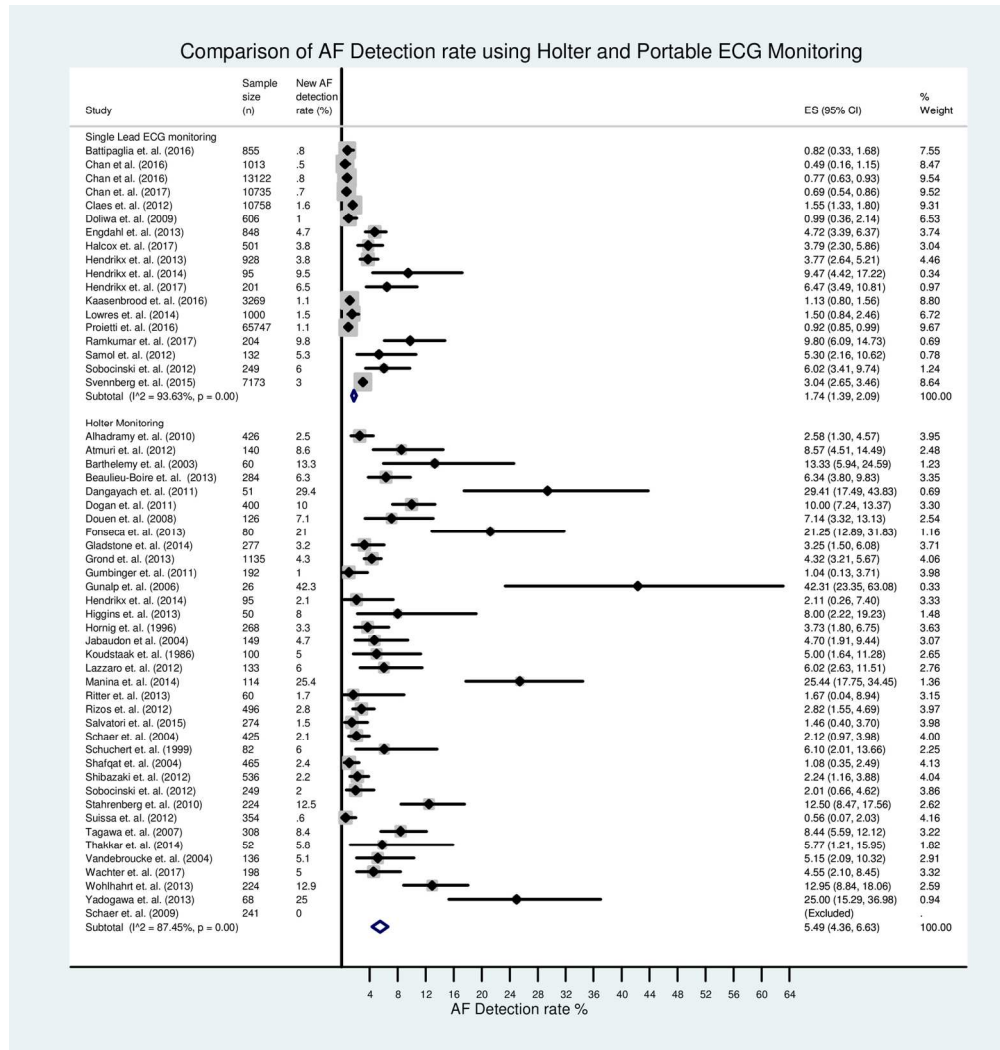

Figure 2

152x159mm (300 x 300 DPI)

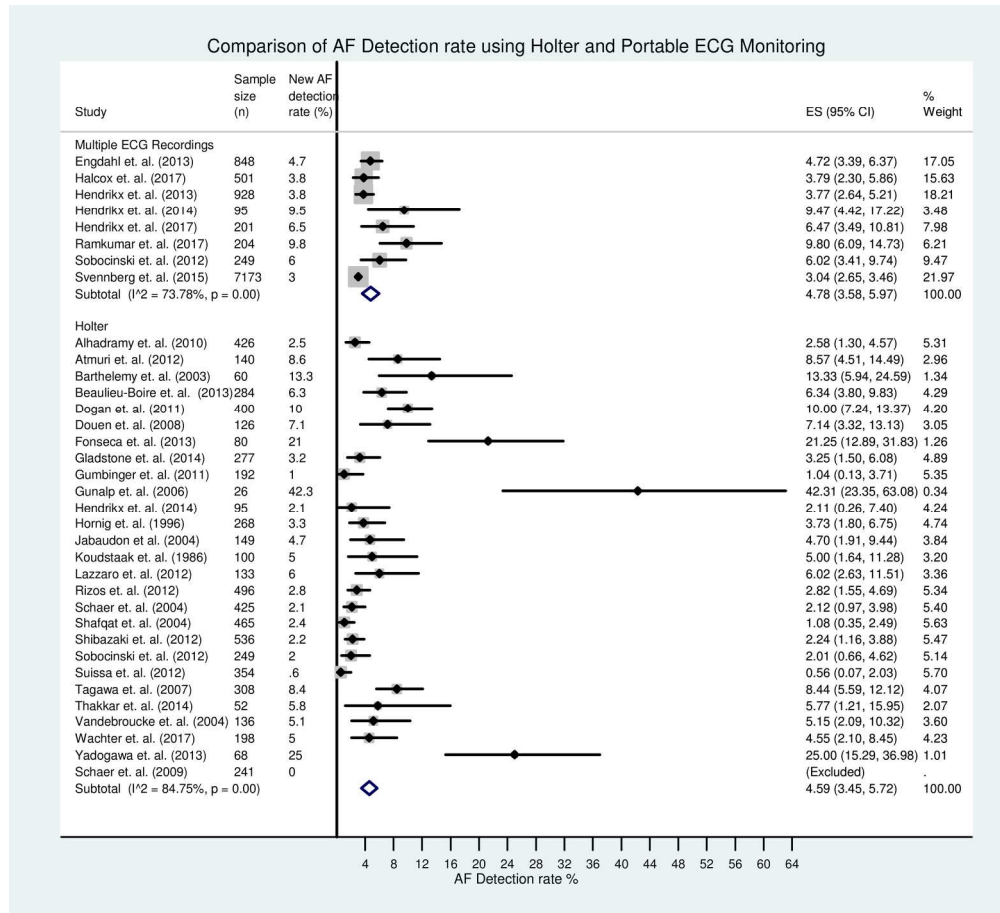

Figure 3

201x183mm (300 x 300 DPI)



1  
2  
3  
4  
5  
6  
7  
8  
9  
10  
11  
12  
13  
14  
15  
16  
17  
18  
19  
20  
21  
22  
23  
24  
25  
26  
27  
28  
29  
30  
31  
32  
33  
34  
35  
36  
37  
38  
39  
40  
41  
42  
43  
44  
45  
46  
47  
48  
49  
50  
51  
52  
53  
54  
55  
56  
57  
58  
59  
60

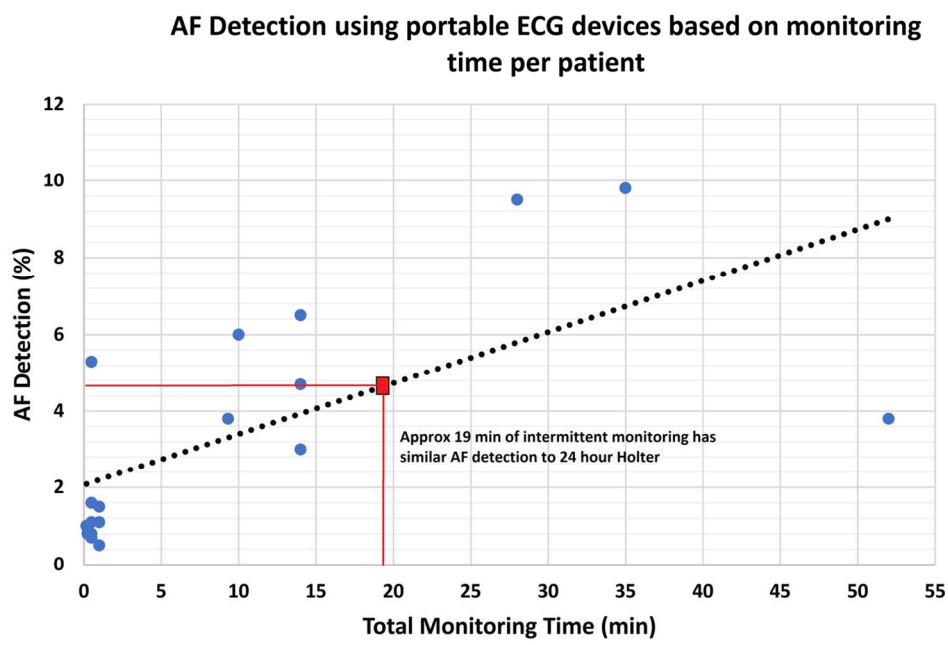

Figure 4

125x84mm (300 x 300 DPI)

Cumulative random-effects meta-analysis of AF Detection using Holter and Portable ECG Monitoring

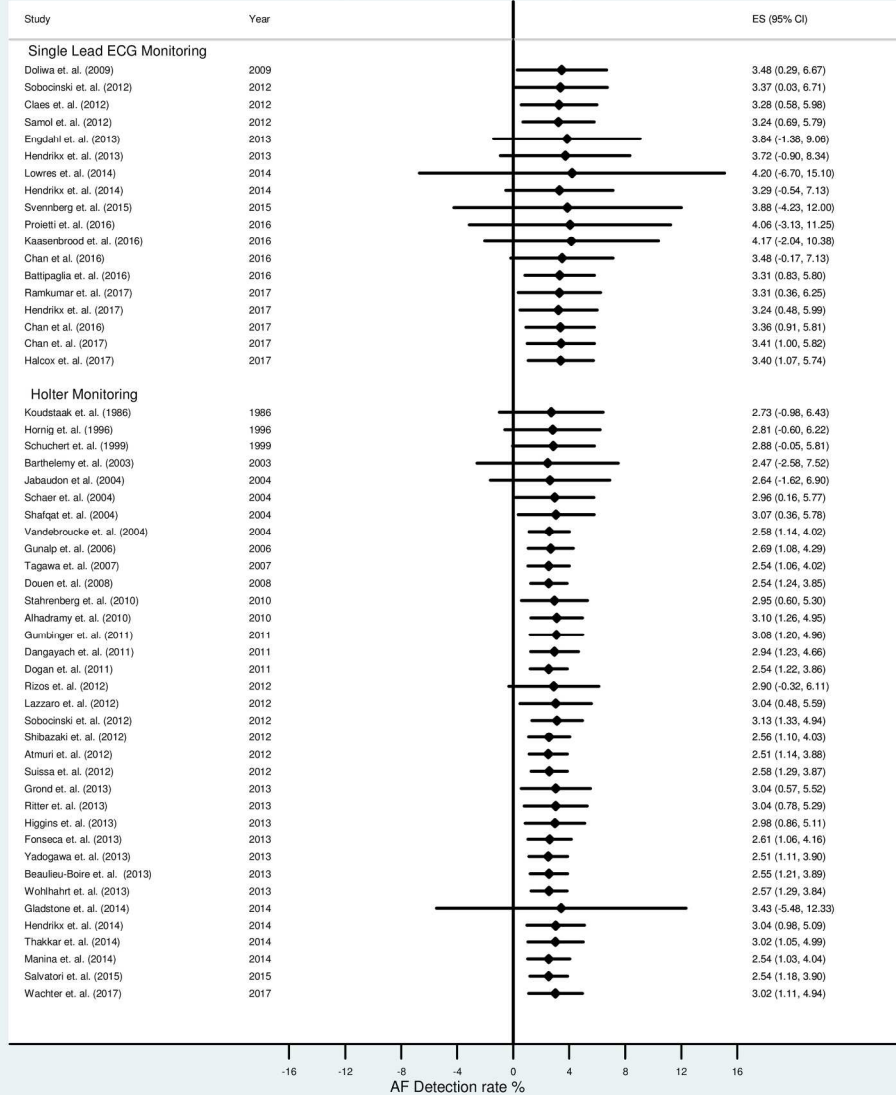

Figure 5

203x241mm (300 x 300 DPI)

1  
2  
3  
4  
5  
6  
7  
8  
9  
10  
11  
12  
13  
14  
15  
16  
17  
18  
19  
20  
21  
22  
23  
24  
25  
26  
27  
28  
29  
30  
31  
32  
33  
34  
35  
36  
37  
38  
39  
40  
41  
42  
43  
44  
45  
46  
47  
48  
49  
50  
51  
52  
53  
54  
55  
56  
57  
58  
59  
60

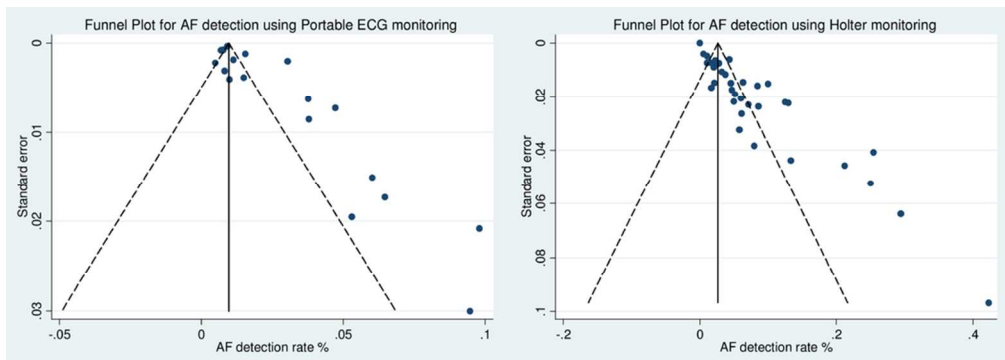

88x31mm (300 x 300 DPI)

peer review only

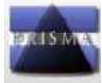

# PRISMA 2009 Checklist

| Section/topic                      | #  | Checklist item                                                                                                                                                                                                                                                                                              | Reported on page # |
|------------------------------------|----|-------------------------------------------------------------------------------------------------------------------------------------------------------------------------------------------------------------------------------------------------------------------------------------------------------------|--------------------|
| <b>TITLE</b>                       |    |                                                                                                                                                                                                                                                                                                             |                    |
| Title                              | 1  | Identify the report as a systematic review, meta-analysis, or both.                                                                                                                                                                                                                                         | 1                  |
| <b>ABSTRACT</b>                    |    |                                                                                                                                                                                                                                                                                                             |                    |
| Structured summary                 | 2  | Provide a structured summary including, as applicable: background; objectives; data sources; study eligibility criteria, participants, and interventions; study appraisal and synthesis methods; results; limitations; conclusions and implications of key findings; systematic review registration number. | 3                  |
| <b>INTRODUCTION</b>                |    |                                                                                                                                                                                                                                                                                                             |                    |
| Rationale                          | 3  | Describe the rationale for the review in the context of what is already known.                                                                                                                                                                                                                              | 4                  |
| Objectives                         | 4  | Provide an explicit statement of questions being addressed with reference to participants, interventions, comparisons, outcomes, and study design (PICOS).                                                                                                                                                  | 4                  |
| <b>METHODS</b>                     |    |                                                                                                                                                                                                                                                                                                             |                    |
| Protocol and registration          | 5  | Indicate if a review protocol exists, if and where it can be accessed (e.g., Web address), and, if available, provide registration information including registration number.                                                                                                                               | 5                  |
| Eligibility criteria               | 6  | Specify study characteristics (e.g., PICOS, length of follow-up) and report characteristics (e.g., years considered, language, publication status) used as criteria for eligibility, giving rationale.                                                                                                      | 5                  |
| Information sources                | 7  | Describe all information sources (e.g., databases with dates of coverage, contact with study authors to identify additional studies) in the search and date last searched.                                                                                                                                  | 5                  |
| Search                             | 8  | Present full electronic search strategy for at least one database, including any limits used, such that it could be repeated.                                                                                                                                                                               | 5                  |
| Study selection                    | 9  | State the process for selecting studies (i.e., screening, eligibility, included in systematic review, and, if applicable, included in the meta-analysis).                                                                                                                                                   | 5                  |
| Data collection process            | 10 | Describe method of data extraction from reports (e.g., piloted forms, independently, in duplicate) and any processes for obtaining and confirming data from investigators.                                                                                                                                  | 5                  |
| Data items                         | 11 | List and define all variables for which data were sought (e.g., PICOS, funding sources) and any assumptions and simplifications made.                                                                                                                                                                       | 5/6                |
| Risk of bias in individual studies | 12 | Describe methods used for assessing risk of bias of individual studies (including specification of whether this was done at the study or outcome level), and how this information is to be used in any data synthesis.                                                                                      | 6                  |
| Summary measures                   | 13 | State the principal summary measures (e.g., risk ratio, difference in means).                                                                                                                                                                                                                               | 6                  |
| Synthesis of results               | 14 | Describe the methods of handling data and combining results of studies, if done, including measures of consistency (e.g., $I^2$ ) for each meta-analysis.                                                                                                                                                   | 6                  |

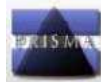

# PRISMA 2009 Checklist

Page 1 of 2

| Section/topic                 | #  | Checklist item                                                                                                                                                                                           | Reported on page # |
|-------------------------------|----|----------------------------------------------------------------------------------------------------------------------------------------------------------------------------------------------------------|--------------------|
| Risk of bias across studies   | 15 | Specify any assessment of risk of bias that may affect the cumulative evidence (e.g., publication bias, selective reporting within studies).                                                             | 6                  |
| Additional analyses           | 16 | Describe methods of additional analyses (e.g., sensitivity or subgroup analyses, meta-regression), if done, indicating which were pre-specified.                                                         | 6                  |
| <b>RESULTS</b>                |    |                                                                                                                                                                                                          |                    |
| Study selection               | 17 | Give numbers of studies screened, assessed for eligibility, and included in the review, with reasons for exclusions at each stage, ideally with a flow diagram.                                          | 6                  |
| Study characteristics         | 18 | For each study, present characteristics for which data were extracted (e.g., study size, PICOS, follow-up period) and provide the citations.                                                             | 6-11               |
| Risk of bias within studies   | 19 | Present data on risk of bias of each study and, if available, any outcome level assessment (see item 12).                                                                                                | 6-11               |
| Results of individual studies | 20 | For all outcomes considered (benefits or harms), present, for each study: (a) simple summary data for each intervention group (b) effect estimates and confidence intervals, ideally with a forest plot. | 6-11               |
| Synthesis of results          | 21 | Present results of each meta-analysis done, including confidence intervals and measures of consistency.                                                                                                  | 11/12              |
| Risk of bias across studies   | 22 | Present results of any assessment of risk of bias across studies (see Item 15).                                                                                                                          | 11/12              |
| Additional analysis           | 23 | Give results of additional analyses, if done (e.g., sensitivity or subgroup analyses, meta-regression [see Item 16]).                                                                                    | 11/12              |
| <b>DISCUSSION</b>             |    |                                                                                                                                                                                                          |                    |
| Summary of evidence           | 24 | Summarize the main findings including the strength of evidence for each main outcome; consider their relevance to key groups (e.g., healthcare providers, users, and policy makers).                     | 12                 |
| Limitations                   | 25 | Discuss limitations at study and outcome level (e.g., risk of bias), and at review-level (e.g., incomplete retrieval of identified research, reporting bias).                                            | 15                 |
| Conclusions                   | 26 | Provide a general interpretation of the results in the context of other evidence, and implications for future research.                                                                                  | 16                 |
| <b>FUNDING</b>                |    |                                                                                                                                                                                                          |                    |
| Funding                       | 27 | Describe sources of funding for the systematic review and other support (e.g., supply of data); role of funders for the systematic review.                                                               | 16/17              |

From: Moher D, Liberati A, Tetzlaff J, Altman DG, The PRISMA Group (2009). Preferred Reporting Items for Systematic Reviews and Meta-Analyses: The PRISMA Statement. PLoS Med 6(7): e1000097. doi:10.1371/journal.pmed1000097

For more information, visit: [www.prisma-statement.org](http://www.prisma-statement.org).

Page 2 of 2

For peer review only - <http://bmjopen.bmj.com/site/about/guidelines.xhtml>

# BMJ Open

## Atrial Fibrillation Detection using Single Lead Portable Electrocardiographic Monitoring: A Systematic Review and Meta-Analysis.

|                                 |                                                                                                                                                                                                                                                                                                                                                |
|---------------------------------|------------------------------------------------------------------------------------------------------------------------------------------------------------------------------------------------------------------------------------------------------------------------------------------------------------------------------------------------|
| Journal:                        | <i>BMJ Open</i>                                                                                                                                                                                                                                                                                                                                |
| Manuscript ID                   | bmjopen-2018-024178.R1                                                                                                                                                                                                                                                                                                                         |
| Article Type:                   | Research                                                                                                                                                                                                                                                                                                                                       |
| Date Submitted by the Author:   | 13-Aug-2018                                                                                                                                                                                                                                                                                                                                    |
| Complete List of Authors:       | Ramkumar, Satish; Baker IDI Heart and Diabetes Institute, CV Imaging<br>Nerlekar, Nitesh; Monash Medical Centre Clayton<br>D'Souza , Daniel ; Monash Medical Centre Clayton<br>Pol , Derek ; Monash Medical Centre Clayton<br>Kalman, Jonathan; Royal Melbourne Hospital,<br>Marwick, Thomas; Baker IDI Heart and Diabetes Institute, Director |
| <b>Primary Subject Heading</b>: | Cardiovascular medicine                                                                                                                                                                                                                                                                                                                        |
| Secondary Subject Heading:      | Cardiovascular medicine                                                                                                                                                                                                                                                                                                                        |
| Keywords:                       | Pacing & electrophysiology < CARDIOLOGY, CLINICAL PHYSIOLOGY,<br>Cardiology < INTERNAL MEDICINE                                                                                                                                                                                                                                                |
|                                 |                                                                                                                                                                                                                                                                                                                                                |

SCHOLARONE™  
Manuscripts

Only

## **Atrial Fibrillation Detection using Single Lead Portable Electrocardiographic Monitoring:**

### **A Systematic Review and Meta-Analysis.**

Satish Ramkumar MBBS, MMed<sup>1,2,3</sup>; Nitesh Nerlekar MBBS, MPH<sup>1,3</sup>; Daniel D'Souza MBBS<sup>3</sup>,  
Derek J Pol MBBS<sup>3</sup>; Jonathan M Kalman<sup>4</sup> MBBS, PhD; Thomas H Marwick MBBS, PhD, MPH<sup>1,2</sup>.

<sup>1</sup>Baker Heart and Diabetes Institute, 75 Commercial Road Melbourne, Victoria 3004, Australia;

<sup>2</sup>School of Public Health and Preventative Medicine, Monash University, 99 Commercial Road,  
Melbourne, Victoria 3004, Australia; <sup>3</sup>Monash Heart, Monash Cardiovascular Research Centre, 246  
Clayton Road, Clayton, Victoria 3168, Australia; <sup>4</sup>Department of Cardiology, Royal Melbourne  
Hospital and the Department of Medicine, University of Melbourne, 300 Grattan Street Parkville,  
Victoria 3050, Australia;

Satish Ramkumar Cardiac Imaging Research Fellow, Baker Heart and Diabetes Institute, Thomas H  
Marwick Director, Baker Heart and Diabetes Institute, Nitesh Nerlekar Cardiac Research Fellow,  
Monash Heart, Daniel D'Souza Cardiology Resident, Monash Heart, Derek J Pol Cardiology  
Registrar, Monash Heart, Jonathan M Kalman Head of Electrophysiology, Royal Melbourne Hospital

Running title: Atrial fibrillation detection

Corresponding Author:

Dr Thomas H. Marwick  
Baker Heart and Diabetes Institute,  
75 Commercial Road, Melbourne, 3004, Australia  
Phone: +61-3-8532-1550; Fax: +61-3-8532-1160  
Email: [Tom.Marwick@bakeridi.edu.au](mailto:Tom.Marwick@bakeridi.edu.au)

Abstract 248 words; Text ~5000 words

1  
2  
3 “The Corresponding Author has the right to grant on behalf of all authors and does grant on behalf of  
4 all authors, *a worldwide licence* to the Publishers and its licensees in perpetuity, in all forms, formats  
5 and media (whether known now or created in the future), to i) publish, reproduce, distribute, display  
6 and store the Contribution, ii) translate the Contribution into other languages, create adaptations,  
7 reprints, include within collections and create summaries, extracts and/or, abstracts of the  
8 Contribution, iii) create any other derivative work(s) based on the Contribution, iv) to exploit all  
9 subsidiary rights in the Contribution, v) the inclusion of electronic links from the Contribution to third  
10 party material where-ever it may be located; and, vi) licence any third party to do any or all of the  
11 above.”  
12  
13  
14  
15  
16  
17  
18  
19  
20  
21

22 **Funding:** This research received no specific grant from any funding agency in the public, commercial  
23 or not-for-profit sectors’.  
24  
25  
26  
27  
28  
29  
30  
31  
32  
33  
34  
35  
36  
37  
38  
39  
40  
41  
42  
43  
44  
45  
46  
47  
48  
49  
50  
51  
52  
53  
54  
55  
56  
57  
58  
59  
60



## ABSTRACT

**Objectives:**Recent advances technology advnaces have allowed for heart rhythm monitoring using single-lead electrocardiographic (ECG) monitoring devices, which can be used for early diagnosis of atrial fibrillation (AF). We sought to investigate the AF detection rate using portable ECG devices compared with Holter monitoring.

**Setting, participants and outcome measures:**We searched the Medline, Embase and Scopus databases(conducted on 8<sup>th</sup> May 2017) using search terms related to AF screening and included studies with adults>18 years using portable ECG devices or Holter monitoring for AF detection. We excluded studies using implantable loop recorders and pacemakers. Using a random-effects model we calculated the overall AF detection rate. Meta-regression analysis was performed to explore potential sources for heterogeneity. Quality of reporting was assessed using the tool developed by Downs and Black.

**Results:**Portable ECG monitoring was used in 18 studies(n=117,436) and Holter monitoring was used in 36 studies(n=8498). The AF detection rate using portable ECG monitoring was 1.7%(95% CI 1.4–2.1), with significant heterogeneity between studies(p<0.001). There was a moderate linear relationship between total monitoring time and AF detection rate(r=0.65, p=0.003), and meta-regression identified total monitoring time(p=0.005) and body mass index(p=0.01) as potential contributors to heterogeneity. The detection rate(4.8%, 95% CI 3.6–6.0%) in 8 studies(n=10,199) which performed multiple ECG recordings was comparable to that with 24 hour Holter(4.6%, 95% CI 3.5–5.7%). Intermittent recordings for 19 minutes total produced similar AF detection to 24 hr. Holter monitoring.

**Conclusion:**Portable ECG devices may offer an efficient screening option for AF compared to 24 hour Holter monitoring.

**Study Registration:** Prospero database - April 22<sup>nd</sup>, 2017(CRD42017061021)

**Key words;** atrial fibrillation, screening, electrocardiographic monitoring.

**Strengths and limitations of this study:**

- First systematic review comparing single lead ECG monitoring to 24 hour holter monitoring for AF detection.
- Comprehensive literature search and specific inclusion criteria allowing for large patient numbers.
- Heterogeneity amongst individual studies with regards to patient population, AF definitions and monitoring time.
- Poor reporting of CHA<sub>2</sub>DS<sub>2</sub>-VASC scores amongst individual studies
- Patient compliance unable to be accounted for in this meta-analysis

1  
2  
3  
4  
5 Atrial fibrillation (AF) is a leading cause of stroke and heart failure worldwide, is associated with  
6 increased all-cause mortality<sup>1,2</sup> as well as substantial financial cost.<sup>3,4</sup> The prevalence of AF increases  
7 with age, exceeding more than 15% for those aged 85 and older.<sup>5</sup> The epidemics of obesity, diabetes  
8 mellitus and metabolic syndrome have also been associated with the increasing prevalence of AF.<sup>6-8</sup>  
9 Up to 20% of patients with stroke have underlying AF, and detection allows the initiation of  
10 anticoagulation which is associated with a significant reduction in stroke recurrence.<sup>9</sup>

11  
12  
13  
14  
15  
16  
17  
18 Early diagnosis of AF may have several benefits, including individualized lifestyle intervention<sup>10</sup> and  
19 anticoagulation, and may be associated with a reduction in complications and healthcare costs. The  
20 importance of early diagnosis has been recognized in recent guidelines from the European Society of  
21 Cardiology (ESC) which recommended opportunistic screening using pulse palpation and 12 lead  
22 electrocardiogram (ECG).<sup>11</sup> However, screening for AF is challenging for several reasons; many  
23 patients are asymptomatic or may have atypical symptoms. There are a variety of monitoring  
24 techniques available, all which vary in diagnostic accuracy and sensitivity, and there is no accepted  
25 reference standard. Subclinical AF is associated with an increased risk of stroke, cardiovascular  
26 disease and all-cause mortality,<sup>12</sup> although there is controversy surrounding the significance of brief  
27 paroxysms of AF and the potential benefit of anticoagulant therapy. Implantable devices are  
28 expensive, and not cost effective for mass screening, and the use of external devices for long periods  
29 of monitoring require electrodes, which may be poorly tolerated by patients.

30  
31  
32  
33  
34  
35  
36  
37  
38  
39  
40  
41  
42 Recent advances in technology have allowed for the development of single lead portable  
43 electrocardiographic monitoring devices. Multiple devices are available, all using multiple points of  
44 finger contact to create a single lead ECG trace. The in-built memory of these devices allows for  
45 single or multiple time-point screening. Interpretation from a cardiologist or by automated algorithms  
46 has achieved high sensitivity and specificity for AF detection.<sup>13-15</sup> Although they have not been  
47 incorporated into the latest AF guidelines, the accuracy, ease of use and potential cost-effectiveness of  
48 these devices may lead to them having an important role in AF screening. This paper describes a  
49  
50  
51  
52  
53  
54  
55  
56  
57  
58  
59  
60

1  
2  
3 systematic review of the published literature to investigate the overall AF detection rate using portable  
4 ECG devices compared with traditional Holter monitoring.  
5  
6

### 7 **Methods.**

9 **Search strategy.** We conducted our systematic review and meta-analysis using the Preferred  
10 Reporting Items for Systematic Reviews and Meta-Analyses guideline (PRISMA).<sup>16</sup> We searched the  
11 Medline, Scopus and Embase databases using key terms including “atrial fibrillation/AF and  
12 screening/monitoring and electrocardiographic/Holter monitoring” which were mapped to subject  
13 headings. We also searched the reference lists to identify other potential articles. The search was  
14 limited to adult human subjects >18 years and limited to the English language (see search strategy for  
15 Medline database in supplementary material). The study was prospectively registered on the Prospero  
16 database on April 22<sup>nd</sup>, 2017(CRD42017061021), and the search was conducted on 8<sup>th</sup> May 2017.  
17  
18

19 **Study selection.** Titles and abstracts of studies identified from the search were reviewed by two  
20 independent reviewers (S.R and D.D). Studies which had a primary aim of AF detection in adult  
21 participants were included. We included all cohorts including community screening, those with risk  
22 factors and recent stroke. The screening methods included portable single lead ECG devices or  
23 continuous (Holter) monitoring (up to one week). We included studies which used single lead ECG  
24 devices for single episode screening or multiple intermittent screening periods. We included  
25 conference abstracts if demographic and outcome data were available. We excluded studies if  
26 participants were <18 years or if other forms of monitoring were used (pacemaker, implantable loop  
27 recorders, event recorders, monitoring patches and inpatient telemetry). We also excluded studies  
28 where AF detection was not the primary aim.  
29  
30

31 The primary outcome of interest was the detection rate of new AF using either single lead intermittent  
32 or continuous monitoring. Our secondary objective was to determine the optimal time of intermittent  
33 monitoring which produced equivalent AF detection to continuous monitoring.  
34  
35

36 **Data Collection.** Full text manuscripts of studies fitting the inclusion criteria were obtained. Quality  
37 of reporting and risk of bias was assessed using the tool developed by Downs and Black.<sup>17</sup> A  
38 standardized data-extraction form was used by the reviewers which included information about the  
39  
40  
41  
42  
43  
44

1  
2  
3 patient demographics, comorbidities, screening strategy, patients with known AF and overall new AF  
4  
5 detection rate. Where data were not reported, we attempted to contact the primary authors of the  
6  
7 study. Any disagreements between the two reviewers were resolved by consensus or by consulting a  
8  
9 third reviewer (TM).

10 **Statistical Analysis.** The cumulative AF detection rate for continuous and intermittent monitoring  
11  
12 and the 95% confidence interval was calculated using a random effects model. The results were  
13  
14 displayed as a forest plot and heterogeneity amongst the studies was assessed using the  $I^2$  statistic. A  
15  
16 subgroup analysis was performed by comparing the cumulative detection rate of single lead ECG  
17  
18 studies which performed multiple timepoint recordings with 24 hour Holter monitoring studies. Linear  
19  
20 regression analysis was used to determine the association between the total monitoring time and AF  
21  
22 detection using single lead ECG devices. This formula was used to determine the monitoring time  
23  
24 using single lead ECG devices to approximate the overall AF detection rate using 24-hour continuous  
25  
26 monitoring. Univariate meta-regression analysis was performed to assess the influence of various  
27  
28 clinical and screening factors with AF detection. Publication bias was assessed using a funnel plot and  
29  
30 the Egger test. Statistical analysis was performed using Stata v.13 (StataCorp, College Station, TX)  
31  
32 with two-tailed p-values <0.05 used to denote statistical significance.  
33

34 **Patient and Public Involvement.** If patients were not involved in this review.  
35  
36

## 37 Results

38  
39 **Study Characteristics.** The PRISMA flowchart of our included studies is shown in Figure 1 and the  
40  
41 search strategy in Supplementary Table 1. Our initial search strategy identified 5427 studies, with  
42  
43 another 26 identified through other sources. After removing duplicate records, 4122 studies were left.  
44  
45 After screening those using the inclusion/exclusion criteria, we identified 111 full text studies for  
46  
47 detailed review, which excluded 59 studies, leaving 52 full text studies for inclusion in the meta-  
48  
49 analysis (see Supplementary Table 2 for excluded studies). Of the 52 studies included, 34 used  
50  
51 continuous (Holter) monitoring (n=8154),<sup>18-51</sup> 16 (n=117,092) used single lead portable ECG  
52  
53 monitoring,<sup>14 15 52-65</sup> and 2 studies (n=344) used both continuous and intermittent single lead  
54  
55 monitoring for AF detection in a head to head comparison.<sup>66 67</sup>  
56  
57  
58  
59  
60

1  
2  
3 The baseline characteristics of the individual studies is presented in Table 1. There was a considerable  
4 range in age (54-76 years), and gender (male 29-77%) between studies. As many studies chose  
5 healthy volunteers and other studies focused on patients post stroke or those with AF risk factors,  
6 there was significant variation in comorbidities such as diabetes, hypertension and obesity. Stroke risk  
7 determined by the CHADS or CHA<sub>2</sub>DS<sub>2</sub>-VASC score was reported in only 14/52 studies (27%). Of  
8 the 52 studies, 36 (69%) were conducted in Europe, 8 (15%) were in Asia, 5 (10%) were in North  
9 America and 3 (6%) in Australia. Nine studies (17%) were retrospective, the remainder all being  
10 prospective cohort or randomized controlled trials.  
11  
12

13  
14  
15 Of the 18 studies using single lead ECG devices, 10 studies (56%) used a single 10-60 sec recording  
16 for AF detection whilst 8 studies (44%) used multiple readings over a 1-52 week period. There were  
17 five portable ECG devices used (Table 1). Sixteen studies (89%) used healthy participants with risk  
18 factors.<sup>14 15 52-61 63-65 67</sup>. Two studies assessed patients following stroke or transient ischemic attack  
19 (TIA).<sup>62 66</sup>  
20  
21

22  
23  
24 Of the 36 studies using continuous (Holter) monitoring, 27 studies (75%) used 24-hour continuous  
25 monitoring,<sup>18-23 25-28 33-36 38 39 41-45 47-50 66 67</sup> 4 studies (11%) used 1 week monitoring,<sup>30-32 51</sup> 2 studies (6%)  
26 used 48-hour monitoring,<sup>37 46</sup> 2 studies (6%) used 72-hour monitoring,<sup>24 29</sup> and 1 study (3%) used 96-  
27 hour monitoring.<sup>40</sup>  
28  
29  
30  
31  
32  
33  
34  
35  
36  
37  
38  
39  
40  
41  
42  
43  
44  
45  
46  
47  
48  
49  
50  
51  
52  
53  
54  
55  
56  
57  
58  
59  
60

| Study                        | n     | Country   | Type of patients used                                                                                 | Device Used                    | Duration of recording (sec) | Frequency of recording /day | Total monitoring (days) | Mean/median age (yrs) | Male (%) | BMI (kg/m <sup>2</sup> ) | HTN (%) | DM (%) | IHD (%) | Previous diagnosis of AF (%) | HF (%) | Previous stroke (%) | Mean/median CHADS <sub>2</sub> /CHADS-VASC | Definition of AF                                                                                 | New AF (n) | New AF rate (%) |
|------------------------------|-------|-----------|-------------------------------------------------------------------------------------------------------|--------------------------------|-----------------------------|-----------------------------|-------------------------|-----------------------|----------|--------------------------|---------|--------|---------|------------------------------|--------|---------------------|--------------------------------------------|--------------------------------------------------------------------------------------------------|------------|-----------------|
| Owres et al. (2014) 52       | 1000  | Australia | Community pharmacy screening                                                                          | Alive Cor                      | 60                          | 1                           | 0                       | 76                    | 44       | NR                       | 62      | 23     | 16      | 10.4                         | 3      | 7                   | 3.3                                        | Cardiologist Interpretation                                                                      | 15         | 1.5             |
| Svennberg et al. (2015) 53   | 7173  | Sweden    | Community screening (75-76 yr olds)                                                                   | Zenico Omron Heartscan HCG-801 | 30                          | 2                           | 14                      | 75                    | 46       | 25.9                     | 50      | 11     | 9.2     | 9.2                          | 3.4    | 9                   | 3.4                                        | 30 sec irregular rhythm without p waves or 2x episodes between 10-29 sec                         | 218        | 3               |
| Pioietti et al. (2016) 54    | 65747 | Belgium   | Belgian Heart Week screening                                                                          | Omron Heartscan HCG-801        | 30                          | 1                           | 0                       | 58                    | 41       | NR                       | 36      | 21     | 23      | 0.5                          | 20     | 20                  | 2                                          | irregular R-R interval, no distinct p waves, variable atrial cycle length                        | 603        | 1.1             |
| Jansenbrood et al. (2016) 55 | 3269  | Holland   | Influenza vaccination - opportunistic screening                                                       | MyDiagnostik                   | 60                          | 1                           | 0                       | 64.1                  | 49       | NR                       | NR      | NR     | NR      | 2.6                          | NR     | NR                  | NR                                         | Cardiologist Interpretation x 2                                                                  | 37         | 1.1             |
| Engdahl et al. (2013) 56     | 848   | Sweden    | Community screening (75-76 yr olds) in Halmstad, Sweden                                               | Zenico                         | 30                          | 2                           | 14                      | 75                    | 43       | NR                       | 53      | 11     | NR      | 9.6                          | 4      | 10                  | 1.9                                        | 30 sec duration of irregular rhythm or >= 2 episodes of 10 or more sec                           | 40         | 4.7             |
| Hendriks et al. (2013) 57    | 928   | Sweden    | GP practices                                                                                          | Zenico                         | 10                          | 2                           | 28                      | 69.8                  | 50       | NR                       | 90.3    | 31.6   | 19.8    | 0                            | 3.7    | 8.6                 | 2                                          | 10 sec irregular rhythm without p waves                                                          | 35         | 3.8             |
| Hendriks et al. (2014) 67    | 95    | Sweden    | Referred for presyncope/palpitations                                                                  | Zenico                         | 30                          | 2                           | 28                      | 54.1                  | 44       | NR                       | 28.4    | 1.1    | 8.4     | 0                            | 0      | 6.3                 | 1                                          | 30 sec irregular rhythm without p waves                                                          | 9          | 9.5             |
| Chan et al. (2016) 15        | 1013  | Hong Kong | Patients ≥ 65 yrs with hypertension or diabetes                                                       | Alive Cor                      | 60                          | 1                           | 0                       | 68.4                  | 47       | NR                       | 90.4    | 36.6   | 16.2    | 2.2                          | 4.4    | 10.5                | 3                                          | Cardiologist Interpretation                                                                      | 5          | 0.5             |
| Sobocinski et al. (2012) 66  | 249   | Sweden    | Patients post TIA/stroke                                                                              | Zenico                         | 10                          | 2                           | 30                      | 72                    | 57       | NR                       | 65      | 16     | 20      | 0                            | 4      | 25                  | 3                                          | irregular rhythm of minimum 10 sec without visible p waves                                       | 15         | 6               |
| Delwa et al. (2009) 14       | 606   | Sweden    | Community event                                                                                       | Zenico                         | 10                          | 1                           | 0                       | NR                    | 64       | NR                       | NR      | NR     | NR      | NR                           | NR     | NR                  | NR                                         | irregular rhythm without visible p waves                                                         | 6          | 1               |
| Kumar et al. (2017) 60       | 204   | Australia | Community - ≥ 65 yrs with 1 or more risk factor for heart failure                                     | Remon RM-100                   | 60                          | 5                           | 7                       | 70.1                  | 51       | 29.1                     | 72.1    | 56.4   | 5.9     | 0                            | 0      | NR                  | 3                                          | 30 sec duration of irregular rhythm with absent p waves                                          | 20         | 9.8             |
| Hendriks et al. (2017) 58    | 201   | Sweden    | Patients referred to respiratory clinics with suspicion of obstructive sleep apnoea                   | Zenico                         | 30                          | 2                           | 14                      | 56                    | 69       | 30                       | 51      | 10     | 9.2     | 0                            | 4.6    | 3.1                 | NR                                         | Irregular supraventricular extra systoles in series for 30 sec                                   | 13         | 6.5             |
| Caes et al. (2011) 61        | 10758 | Belgium   | Community heart rhythm screening program through medical centres                                      | Omron Heartscan HCG-801        | 30                          | 1                           | 0                       | 59                    | 38       | NR                       | 30.6    | 8.6    | 12.2    | 7.2                          | 7.2    | 5.4                 | 1                                          | Irregular RR intervals, absence of p waves and variable atrial cycle length (when visible)       | 167        | 1.6             |
| Samol et al. (2012) 62       | 132   | Germany   | Large proportion post stroke/TIA. Also recruited from diabetes, hypertension and dyslipidemia clinics | Omron Heartscan HCG-801        | 30                          | 1                           | 0                       | 64                    | 58       | NR                       | 67      | 27     | NR      | 0                            | 3      | 49                  | NR                                         | Cardiologist Interpretation x 2                                                                  | 7          | 5.3             |
| Balpaglia et al. (2016) 63   | 855   | UK        | Community shopping centre screening                                                                   | MyDiagnostik                   | 15                          | 1                           | 0                       | NR                    | NR       | NR                       | NR      | NR     | NR      | NR                           | NR     | NR                  | NR                                         | NR                                                                                               | 7          | 0.8             |
| Chan et al. (2016) 59        | 13122 | Hong Kong | Nationwide community screening program                                                                | Alive Cor                      | 30                          | 1                           | 0                       | 64.7                  | 29       | 23.7                     | 38.2    | 14.8   | 2.2     | 0                            | 0.7    | 2.8                 | NR                                         | Software algorithm definition with minimum of 30 sec                                             | 101        | 0.8             |
| Chan et al. (2017) 65        | 10735 | Hong Kong | Nationwide community screening program                                                                | Alive Cor                      | 30                          | 1                           | 0                       | NR                    | NR       | NR                       | NR      | NR     | NR      | 1.2                          | NR     | NR                  | NR                                         | Cardiologist interpretation (≥ 30 sec)                                                           | 74         | 0.7             |
| Hiscox et al. (2017) 64      | 501   | UK        | Community based with individuals > 65 yrs with CHADS-VASC score ≥ 2                                   | Alive Cor                      | 30                          | 2x per week                 | 365                     | 72.6                  | 48       | NR                       | 54      | 26     | 14      | 0                            | 1.0    | 7.0                 | 3.0                                        | 30 second duration of an irregular rhythm without P waves                                        | 19         | 3.8             |
| Gladstone et al. (2014) 18   | 277   | Canada    | Patients admitted with cryptogenic stroke                                                             | Holter                         | continuous                  | continuous                  | 1                       | 73.2                  | 56       | NR                       | 67      | 19.3   | 14.7    | 0                            | 7      | 12.6                | NR                                         | 30 second or longer duration of irregular rhythm                                                 | 9          | 3.2             |
| Barthelemy et al. (2003) 19  | 60    | France    | Consecutive patients admitted with stroke/TIA                                                         | Holter                         | continuous                  | continuous                  | 1                       | 64.4                  | 55       | NR                       | 50      | 17     | NR      | 0                            | NR     | 27                  | NR                                         | fibrillatory waves associated with irregular ventricular response ratio at least 30 sec duration | 8          | 13.3            |

Atrial fibrillation detection using portable electrocardiographic monitoring devices.; Page 10

|    |                              |      |             |                                                                         |        |            |            |   |      |    |      |      |      |      |     |      |      |                                                                                                                                                            |                                                                                                                                                                                                               |     |      |
|----|------------------------------|------|-------------|-------------------------------------------------------------------------|--------|------------|------------|---|------|----|------|------|------|------|-----|------|------|------------------------------------------------------------------------------------------------------------------------------------------------------------|---------------------------------------------------------------------------------------------------------------------------------------------------------------------------------------------------------------|-----|------|
| 1  |                              |      |             |                                                                         |        |            |            |   |      |    |      |      |      |      |     |      |      |                                                                                                                                                            |                                                                                                                                                                                                               |     |      |
| 2  |                              |      |             |                                                                         |        |            |            |   |      |    |      |      |      |      |     |      |      |                                                                                                                                                            |                                                                                                                                                                                                               |     |      |
| 3  |                              |      |             |                                                                         |        |            |            |   |      |    |      |      |      |      |     |      |      |                                                                                                                                                            |                                                                                                                                                                                                               |     |      |
| 4  | Jabaudon et al.              |      |             | Consecutive patients admitted with stroke/TIA                           | Holter | continuous | continuous | 1 | 66.9 | 68 | NR   | 58   | 16.7 | 16.8 | 4.7 | NR   | 16.8 | NR                                                                                                                                                         | NR                                                                                                                                                                                                            |     |      |
| 5  | (2004) 20                    | 149  | Switzerland |                                                                         |        |            |            |   |      |    |      |      |      |      |     |      |      |                                                                                                                                                            | 7                                                                                                                                                                                                             | 4.7 |      |
| 6  |                              |      |             | Retrospective study of 100 patients admitted with stroke/TIA            | Holter | continuous | continuous | 1 | 60.9 | 74 | NR   | NR   | NR   | 41   | NR  | NR   | NR   | NR                                                                                                                                                         | NR                                                                                                                                                                                                            | 5   | 5    |
| 7  | oudstaal et al. (1986) 21    | 100  | Holland     |                                                                         |        |            |            |   |      |    |      |      |      |      |     |      |      |                                                                                                                                                            |                                                                                                                                                                                                               |     |      |
| 8  |                              |      |             | Consecutive patients admitted with stroke/TIA                           | Holter | continuous | continuous | 1 | 59.1 | 61 | NR   | 43.7 | 34   | NR   | NR  | 14.9 | 45   | NR                                                                                                                                                         | NR                                                                                                                                                                                                            | 10  | 3.3  |
| 9  | Hornig et al. (1996) 22      | 268  | Germany     |                                                                         |        |            |            |   |      |    |      |      |      |      |     |      |      |                                                                                                                                                            |                                                                                                                                                                                                               |     |      |
| 10 |                              |      |             | Patients admitted with stroke/TIA                                       | Holter | continuous | continuous | 1 | 69   | 62 | NR   | 78.8 | 24.6 | NR   | NR  | NR   | 22.2 | 3                                                                                                                                                          | Cardiologist interpretation ( $\geq 30$ sec)                                                                                                                                                                  | 14  | 2.8  |
| 11 | Pisos et al. (2012) 23       | 496  | Germany     |                                                                         |        |            |            |   |      |    |      |      |      |      |     |      |      |                                                                                                                                                            |                                                                                                                                                                                                               |     |      |
| 12 |                              |      |             | Consecutive patients admitted with stroke/TIA                           | Holter | continuous | continuous | 3 | 59.7 | 57 | NR   | 36.5 | NR   | 17.1 | NR  | NR   | NR   | NR                                                                                                                                                         | Small irregular baseline undulations of variable amplitudes and morphology at a rate $>350$ /min with an irregular ventricular response for at least 1 min.                                                   | 5   | 6    |
| 13 | Duchert et al. (1999) 24     | 82   | Germany     |                                                                         |        |            |            |   |      |    |      |      |      |      |     |      |      |                                                                                                                                                            |                                                                                                                                                                                                               |     |      |
| 14 |                              |      |             | Consecutive patients admitted with stroke/TIA                           | Holter | continuous | continuous | 1 | 68.7 | 59 | NR   | 76   | 25   | 41   | 7   | NR   | 4.6  | NR                                                                                                                                                         | NR                                                                                                                                                                                                            | 0   | 0    |
| 15 | Jaer et al. (2009) 25        | 241  | Switzerland |                                                                         |        |            |            |   |      |    |      |      |      |      |     |      |      |                                                                                                                                                            |                                                                                                                                                                                                               |     |      |
| 16 |                              |      |             | Retrospective review of patients post stroke/TIA with Holter monitoring | Holter | continuous | continuous | 1 | 67.4 | 61 | NR   | NR   | NR   | NR   | NR  | NR   | 1.2  | NR                                                                                                                                                         | Self-terminating sequence of $>30$ seconds of irregular RR intervals and the presence of fibrillatory P waves.                                                                                                | 9   | 2.1  |
| 17 | Baer et al. (2004) 26        | 425  | Switzerland |                                                                         |        |            |            |   |      |    |      |      |      |      |     |      |      |                                                                                                                                                            |                                                                                                                                                                                                               |     |      |
| 18 |                              |      |             | Retrospective review of consecutive patients admitted with stroke/TIA   | Holter | continuous | continuous | 1 | 66.8 | 56 | NR   | NR   | NR   | NR   | NR  | NR   | NR   | NR                                                                                                                                                         | NR                                                                                                                                                                                                            | 5   | 2.4  |
| 19 | Shafiqat et al. (2004) 27    | 465  | Pakistan    |                                                                         |        |            |            |   |      |    |      |      |      |      |     |      |      |                                                                                                                                                            |                                                                                                                                                                                                               |     |      |
| 20 |                              |      |             | Consecutive patients admitted with stroke/TIA                           | Holter | continuous | continuous | 1 | 63.1 | 50 | NR   | 70   | 29.3 | 18.8 | 0   | NR   | 2.3  | NR                                                                                                                                                         | Supraventricular tachyarrhythmia characterized by uncoordinated atrial activation with fibrillatory waves varying in amplitude, shape, and timing, replacing consistent P waves and with a duration $>30$ sec | 8   | 6    |
| 21 | Lazzaro et al. (2012) 28     | 133  | USA         |                                                                         |        |            |            |   |      |    |      |      |      |      |     |      |      |                                                                                                                                                            |                                                                                                                                                                                                               |     |      |
| 22 |                              |      |             | Patients admitted in 7 German centres with stroke/TIA                   | Holter | continuous | continuous | 3 | 67   | 55 | 27.4 | 20.4 | 7.3  | 0    | 5.8 | 17.4 | NR   | $\geq 1$ period of $>30$ sec duration of an absolute arrhythmia without detectable P waves and without a ptern more consistent with an alternate diagnosis | 49                                                                                                                                                                                                            | 4.3 |      |
| 23 | Grand et al. (2013) 29       | 1135 | Germany     |                                                                         |        |            |            |   |      |    |      |      |      |      |     |      |      |                                                                                                                                                            |                                                                                                                                                                                                               |     |      |
| 24 |                              |      |             | Consecutive patients admitted with stroke/TIA                           | Holter | continuous | continuous | 7 | 68   | 58 | 27.6 | 72.9 | 22.3 | 14.8 | 0   | 5.2  | 16.2 | NR                                                                                                                                                         | 2 x Cardiologist interpretation of software algorithm detection of events                                                                                                                                     | 28  | 12.5 |
| 25 | Stahrenberg et al. (2010) 30 | 224  | Germany     |                                                                         |        |            |            |   |      |    |      |      |      |      |     |      |      |                                                                                                                                                            |                                                                                                                                                                                                               |     |      |
| 26 |                              |      |             | Patients admitted with cryptogenic stroke                               | Holter | continuous | continuous | 7 | 61.8 | 57 | NR   | 70   | 11.7 | 13.3 | NR  | 0    | NR   | 4                                                                                                                                                          | Cardiologist interpretation ( $> 30$ sec)                                                                                                                                                                     | 1   | 1.7  |
| 27 | Mitter et al. (2013) 31      | 60   | Germany     |                                                                         |        |            |            |   |      |    |      |      |      |      |     |      |      |                                                                                                                                                            |                                                                                                                                                                                                               |     |      |
| 28 |                              |      |             | Patients admitted with stroke/TIA                                       | Holter | continuous | continuous | 7 | 67.1 | 48 | NR   | 56   | 8    | 16   | 0   | NR   | NR   | NR                                                                                                                                                         | Cardiologist interpretation ( $> 30$ sec)                                                                                                                                                                     | 4   | 8    |
| 29 | Higgins et al. (2013) 32     | 50   | Scotland    |                                                                         |        |            |            |   |      |    |      |      |      |      |     |      |      |                                                                                                                                                            |                                                                                                                                                                                                               |     |      |
| 30 |                              |      |             | Patients investigated for palpitations and presyncope                   | Holter | continuous | continuous | 1 | 54.1 | 42 | NR   | 28.4 | 1.1  | 8.4  | 0   | 0    | 6.3  | 1                                                                                                                                                          | 30 sec irregular rhythm without p waves                                                                                                                                                                       | 2   | 2.1  |
| 31 | Drikx et al. (2014) 67       | 95   | Sweden      |                                                                         |        |            |            |   |      |    |      |      |      |      |     |      |      |                                                                                                                                                            |                                                                                                                                                                                                               |     |      |
| 32 |                              |      |             | Consecutive patients admitted with stroke/TIA                           | Holter | continuous | continuous | 1 | 59.5 | 77 | NR   | 51.9 | 23.1 | 15.4 | 0   | 1.7  | 7.7  | NR                                                                                                                                                         | 30 sec irregular rhythm without p waves                                                                                                                                                                       | 3   | 5.8  |
| 33 | Kakar et al. (2014) 33       | 52   | India       |                                                                         |        |            |            |   |      |    |      |      |      |      |     |      |      |                                                                                                                                                            |                                                                                                                                                                                                               |     |      |
| 34 |                              |      |             | Consecutive patients admitted with stroke/TIA                           | Holter | continuous | continuous | 1 | 73.2 | 62 | NR   | 80.7 | 26.4 | 9.1  | 0   | 4.6  | 21.7 | 4.8                                                                                                                                                        | $>30$ seconds rhythm with irregular RR intervals and the presence of fibrillatory P waves.                                                                                                                    | 9   | 5    |
| 35 | Wachter et al. (2017) 34     | 198  | Germany     |                                                                         |        |            |            |   |      |    |      |      |      |      |     |      |      |                                                                                                                                                            |                                                                                                                                                                                                               |     |      |
| 36 |                              |      |             | Patients admitted with stroke/TIA                                       | Holter | continuous | continuous | 1 | NR   | NR | NR   | NR   | NR   | NR   | NR  | NR   | NR   | NR                                                                                                                                                         | NR                                                                                                                                                                                                            | 2   | 1    |
| 37 | ebinger et al. (2012) 35     | 192  | Germany     |                                                                         |        |            |            |   |      |    |      |      |      |      |     |      |      |                                                                                                                                                            |                                                                                                                                                                                                               |     |      |
| 38 |                              |      |             | Retrospective review of patients post stroke/TIA with Holter monitoring | Holter | continuous | continuous | 1 | 64.9 | 48 | NR   | 58.2 | 14.1 | 14.1 | 0   | 1.6  | 6.3  | NR                                                                                                                                                         | Irregular ventricular response in the absence of p-waves or with fibrillatory waves                                                                                                                           | 11  | 2.5  |
| 39 | Madramy et al. (2010) 36     | 426  | Canada      |                                                                         |        |            |            |   |      |    |      |      |      |      |     |      |      |                                                                                                                                                            |                                                                                                                                                                                                               |     |      |
| 40 |                              |      |             | Consecutive patients admitted with stroke/TIA                           | Holter | continuous | continuous | 1 | 72   | 57 | NR   | 65   | 16   | 20   | 0   | 4    | 25   | 3                                                                                                                                                          | irregular rhythm of minimum 10 sec without visible p waves                                                                                                                                                    | 5   | 2    |
| 41 | ocinski et al. (2012) 66     | 249  | Sweden      |                                                                         |        |            |            |   |      |    |      |      |      |      |     |      |      |                                                                                                                                                            |                                                                                                                                                                                                               |     |      |
| 42 |                              |      |             | Retrospective audit of patients admitted with cryptogenic stroke        | Holter | continuous | continuous | 2 | 58.2 | 43 | NR   | 35.3 | 16   | 15.7 | 7.4 | NR   | NR   | NR                                                                                                                                                         | NR                                                                                                                                                                                                            | 15  | 29.4 |
| 43 | Dangayach et al. (2011) 37   | 51   | USA         |                                                                         |        |            |            |   |      |    |      |      |      |      |     |      |      |                                                                                                                                                            |                                                                                                                                                                                                               |     |      |



|    |                                  |     |           |                                                                            |        |            |            |   |      |    |    |      |      |      |      |     |      |    |                             |    |      |
|----|----------------------------------|-----|-----------|----------------------------------------------------------------------------|--------|------------|------------|---|------|----|----|------|------|------|------|-----|------|----|-----------------------------|----|------|
| 4  | Unalp et. al. (2006) 38          | 26  | Turkey    | Patients admitted with ischaemic stroke                                    | Holter | continuous | continuous | 1 | 66   | 69 | NR | 61   | 26   | 31   | NR   | NR  | NR   | NR | NR                          | 11 | 42.3 |
| 5  | Fonseca et. al. (2013) 39        | 80  | Portugal  | Patients admitted with cryptogenic stroke                                  | Holter | continuous | continuous | 1 | 69.3 | 53 | NR | 71.3 | 28.8 | 11.3 | NR   | NR  | 22.5 | NR | NR                          | 17 | 21   |
| 7  | Manina et. al. (2014) 40         | 114 | Italy     | Patients admitted with cryptogenic stroke                                  | Holter | continuous | continuous | 4 | 63.1 | NR | NR | 52.6 | 9.6  | NR   | NR   | NR  | NR   | NR | NR                          | 29 | 25.4 |
| 9  | Tagawa et. al. (2007) 41         | 308 | Japan     | Consecutive patients admitted with ischaemic stroke                        | Holter | continuous | continuous | 1 | 72.6 | 60 | NR | 70.1 | 25.3 | NR   | 20.4 | NR  | NR   | NR | NR                          | 26 | 8.4  |
| 11 | Shibazaki et. al. (2012) 42      | 536 | Japan     | Consecutive patients admitted with ischaemic stroke                        | Holter | continuous | continuous | 1 | 72.4 | 64 | NR | 65.9 | 25.7 | 9.8  | NR   | 0.3 | NR   | NR | NR                          | 12 | 2.2  |
| 13 | Van debroucke et. al. (2004) 43  | 136 | Belgium   | Retrospective audit of patients admitted with ischaemic stroke             | Holter | continuous | continuous | 1 | 68   | 52 | NR | NR   | NR   | NR   | NR   | NR  | NR   | NR | NR                          | 7  | 5.1  |
| 15 | Yogawa et. al. (2013) 44         | 68  | Japan     | Consecutive patients admitted with ischaemic stroke                        | Holter | continuous | continuous | 1 | 69.9 | 54 | NR | 66.2 | 14.7 | NR   | NR   | NR  | NR   | NR | NR                          | 17 | 25   |
| 17 | Attmuri et. al. (2012) 45        | 140 | Australia | Retrospective audit of patients admitted with ischaemic stroke/TIA         | Holter | continuous | continuous | 1 | NR   | NR | NR | 65   | 20   | 37.1 | 18.6 | NR  | NR   | NR | NR                          | 12 | 8.6  |
| 19 | Salvatori et. al. (2015) 46      | 274 | Italy     | Cohort study of patients ≥ 65 yrs with hypertension in multiple GP clinics | Holter | continuous | continuous | 2 | 70   | 54 | NR | 100  | 15   | 9    | 7    | 4   | 2.2  | NR | Cardiologist interpretation | 4  | 1.5  |
| 21 | Beaulieu-Boire et. al. (2013) 47 | 284 | Canada    | Consecutive patients admitted with stroke/TIA                              | Holter | continuous | continuous | 1 | 70.6 | 52 | NR | 68.7 | 26.7 | 27.4 | NR   | 2.2 | 22.3 | NR | Cardiologist interpretation | 18 | 6.3  |
| 23 | Urgan et. al. (2011) 48          | 400 | Turkey    | Retrospective review of patients admitted post stroke                      | Holter | continuous | continuous | 1 | NR   | NR | NR | NR   | NR   | NR   | NR   | NR  | NR   | NR | NR                          | 40 | 10   |
| 25 | Wen et. al. (2008) 49            | 126 | Canada    | Retrospective review of patients admitted post stroke                      | Holter | continuous | continuous | 1 | NR   | NR | NR | NR   | NR   | NR   | 7    | NR  | NR   | NR | NR                          | 9  | 7.1  |
| 27 | Suissa et. al. (2012) 50         | 354 | France    | Consecutive patients admitted with ischaemic stroke                        | Holter | continuous | continuous | 1 | 62.4 | 57 | NR | 51.1 | 18.6 | NR   | 0    | NR  | NR   | NR | Cardiologist interpretation | 2  | 0.6  |
| 28 | Alhahrt et. al. (2013) 51        | 224 | Germany   | Patients admitted with ischaemic stroke                                    | Holter | continuous | continuous | 7 | 68.5 | 59 | NR | 73.2 | 22.3 | 15.2 | NR   | 5.4 | 24.1 | NR | >30 second irregular rhythm | 29 | 12.9 |

AF – Atrial Fibrillation    BMI – Body Mass Index (kg/m<sup>2</sup>)    DM – Diabetes Mellitus    HF – Heart Failure    HTN - Hypertension    IHD – Ischaemic Heart Disease

**Table 1 – Summary of included trials investigating AF detection using single lead ECG devices or Holter Monitoring**

1  
2  
3 **Overall AF detection.** The combined AF detection rate using single lead ECG monitoring  
4 (n=117,436 from 18 studies) was 1.7% (95% CI 1.4% – 2.1%). The cumulative AF detection rate  
5 using continuous (Holter) monitoring (n=8498 from 36 studies) was 5.5% (95% CI 4.4% – 6.6%).  
6  
7 There was significant heterogeneity between studies ( $I^2 = 94%$  for single lead ECG monitoring, 87%  
8 for Holter monitoring). The overall new AF detection rate is presented in Figure 2.  
9  
10

11  
12 **Comparison of multiple intermittent monitoring to 24 hour Holter.** There was significant  
13 variation in the monitoring time using both single lead and Holter monitoring which contributed to  
14 the difference in the cumulative detection rate seen in Figure 2. Figure 3 compares the detection rate  
15 of multiple intermittent single lead recordings to 24-hour continuous monitoring, which is used  
16 routinely in clinical practice. There were 8 studies (n=10,199, mean weighted age 68.8±8.4 years  
17 from 6 studies, 47% male from 8 studies) that performed multiple intermittent single lead ECG  
18 recordings and 27 studies (n=6284, mean weighted age 67.8±5.1 years from 23 studies, 58% male  
19 from 23 studies) that used 24-hour Holter monitoring. From the data available, the multiple  
20 intermittent ECG group had a lower AF risk to the 24-hour Holter group (hypertension – 55% (n=8  
21 studies) vs 65% (n=20 studies), diabetes mellitus – 15% (n=8 studies) vs 22% (n=20 studies), heart  
22 failure – 3.3% (n=8 studies) vs 3.9% (n=11 studies), ischemic heart disease – 11% (n=6 studies) vs  
23 19% (n=15 studies) and previous stroke/TIA – 9% (n=7 studies) vs 16% (n=15 studies))  
24 respectively. The combined AF detection rate was 4.8% (95% CI 3.6–6.0%) using multiple  
25 intermittent ECG recordings. The cumulative AF detection rate using 24-hour Holter monitoring was  
26 4.6% (95% CI 3.5–5.7%).  
27  
28  
29  
30  
31  
32  
33  
34  
35  
36  
37  
38  
39  
40  
41

42 **Association between monitoring time and AF detection.** Using single lead ECG devices, we  
43 found a moderate linear relationship between the total monitoring time and AF detection rate  
44 ( $\beta=0.13$ ,  $R^2 = 0.42$ ). Using this formula, we noted that approximately 19 minutes of total intermittent  
45 monitoring produced similar AF detection to 24-hour continuous monitoring (Figure 4). The study  
46 by Halcox et. al. was an outlier, with a much lower AF detection rate than other studies (3.8% from  
47 52 minutes of total monitoring) and this reduced the linear correlation between total monitoring time  
48 and AF detection rate<sup>64</sup>. Exclusion of these data led to a stronger linear relationship ( $\beta=0.26$ ,  $R^2 =$   
49  
50  
51  
52  
53  
54  
55  
56  
57  
58  
59  
60

0.80) and a much lower total intermittent monitoring time required (12 min) to produce a similar AF detection rate to 24 hour Holter monitoring.

**Meta-regression.** Sources of heterogeneity in the 18 studies using single lead ECG monitoring were investigated using meta-regression (Table 2). Monitoring time per participant ( $\beta=0.11$ , 95% CI 0.04-0.18,  $p=0.005$ ) and body mass index ( $\beta=1.1$ , 95% CI 0.58-1.5,  $p=0.01$ ) were associated with AF detection.

| Variable                              | Number of studies | $\beta$ (95% C.I)    | P value |
|---------------------------------------|-------------------|----------------------|---------|
| Age (years)                           | 15                | 0.00 (-0.22 – 0.24)  | 0.95    |
| Monitoring time per participant (min) | 18                | 0.11 (0.04 – 0.18)   | 0.005   |
| Body Mass Index (kg/m <sup>2</sup> )  | 4                 | 1.1 (0.58 – 1.5)     | 0.01    |
| CHADS Score (%)                       | 11                | -0.13 (-2.6 – 2.4)   | 0.91    |
| Hypertension (%)                      | 14                | 0.01 (-0.08 – 0.10)  | 0.75    |
| Previous diagnosis of AF (%)          | 16                | -0.13 (-0.50 – 0.24) | 0.46    |
| Ischaemic Heart Disease (%)           | 12                | -0.10 (-0.42 – 0.21) | 0.48    |
| Previous stroke (%)                   | 13                | 0.06 (-0.09 – 0.19)  | 0.45    |
| Male gender                           | 16                | 0.10 (-0.04 – 0.24)  | 0.16    |

**Table 2 – Meta Regression Analysis for AF detection (Single lead ECG studies)**

**Sensitivity Analysis.** A number of outlier studies were observed in the meta-analysis that could influence the cumulative AF detection rate.<sup>37-40 44</sup> Removal of these outlier studies resulted in a reduction in the overall AF detection rate in all Holter studies (table 3) and for 24 hour holter studies (table 4). When these outlier studies were removed the overall AF detection rate for 24 hour Holter was 3.86% (95% C.I 2.88% – 4.83%), much lower than the detection rate by multiple intermittent ECG recordings using portable single lead devices (4.78%, 95% C.I 3.58% – 5.97%). A cumulative meta-analysis (figure 5) did not show any significant variation in the AF detection rate over time using either

| Study Omitted            | Overall AF detection rate (%) | 95% C.I (%) |
|--------------------------|-------------------------------|-------------|
| Dangayach et. al. (2011) | 5.27                          | 4.17 – 6.38 |
| Fonseca et. al. (2013)   | 5.26                          | 4.15 – 6.36 |
| Gunalp et. al. (2006)    | 5.32                          | 4.21 – 6.42 |
| Manina et. al. (2014)    | 5.11                          | 4.03 – 6.20 |
| Yadogawa et. al. (2013)  | 5.25                          | 4.14 – 6.35 |
| All studies excluded     | 4.31                          | 3.36 – 5.26 |

Holter or single lead ECG monitoring.

**Table 3 – Outlier studies omitted (all Holter studies) to assess the change to the overall AF detection rate**

| Study Omitted           | Overall AF detection rate (%) | 95% C.I (%) |
|-------------------------|-------------------------------|-------------|
| Fonseca et. al. (2013)  | 4.30                          | 3.21 – 5.39 |
| Gunalp et. al. (2006)   | 4.39                          | 3.30 – 5.47 |
| Yadogawa et. al. (2013) | 4.30                          | 3.22 – 5.38 |
| All studies excluded    | 3.86                          | 2.88 – 4.83 |

**Table 4 – Outlier studies omitted (24 hour Holter) to assess the change to the overall AF detection rate**

**Publication bias.** Publication bias was explored using a funnel plot of all included studies (Supplemental Figure 1). There was significant publication bias in both single lead ECG device and Holter monitoring studies (Egger test,  $p=0.003$  and  $p<0.001$  respectively).

**Quality of studies.** A summary of the quality analysis (Supplemental Table 3) showed that overall quality of reporting was moderate. All studies described the primary objective of the trial and included a summary of the main findings. Detailed comorbidities of the study participants were only adequately reported in 28/52 (54%), and limitations were discussed in 35/52 (67%) of studies. Most had a very selective patient population, 31/52 (60%) were post stroke/TIA cohorts.

## Discussion

Our study is the only systematic review that we are aware of that has studied the overall AF detection rate of single lead portable ECG devices. The results of our systematic review suggest a

1  
2  
3 linear relationship between monitoring time per patient and AF detection rate. Single timepoint  
4  
5 screening has an approximate 1% AF detection rate which can be increased to around 5% when  
6  
7 multiple recordings are performed. We noted that approximately 19 minutes of intermittent  
8  
9 monitoring produced similar detection rates to conventional 24 hours continuous Holter monitoring.

10 **Early diagnosis of AF:** AF creates a significant burden on both patients as well as the health care  
11  
12 system. AF will continue to rise in incidence and the costs to the health care system will continue to  
13  
14 increase, due to aging, sedentariness, and the prevalence of obesity and the metabolic syndrome.<sup>3 68</sup>

15  
16 Early diagnosis offers the possibility for early initiation of treatment which may reduce the  
17  
18 occurrence of the complications which may lead to reduced hospital admissions and associated  
19  
20 health care costs. Early treatment for AF can be achieved in different ways. Patients with subclinical  
21  
22 AF have an increased risk of stroke and cardiovascular events, like those with established AF.<sup>12 69</sup>  
23  
24 Anticoagulation may help reduce the incidence of stroke in this cohort.

25  
26 The close relationship between metabolic syndrome and AF has encouraged research into the  
27  
28 benefits of lifestyle intervention. Aggressive lifestyle intervention in patients with AF undergoing  
29  
30 catheter ablation has been reported to lead to a reduction in symptom burden, improved quality of  
31  
32 life and the need for repeat ablation procedures.<sup>10</sup> It remains to be tested whether initiation of  
33  
34 lifestyle intervention and aggressive risk factor modification following the early diagnosis of AF  
35  
36 may be associated with positive LA remodeling and reduction of disease progression. Such a process  
37  
38 may lead to additional health benefits, including reduction in cardiovascular risk and improvement  
39  
40 in exercise capacity.

41  
42 **AF screening and feasibility.** AF is a leading cause of stroke and heart failure in the community. As  
43  
44 well as an association with increased all-cause mortality, it is associated with reduced quality of life.  
45  
46 The availability of preventive therapies, including anticoagulation, has led to increasing recognition  
47  
48 of the importance of AF screening for early diagnosis. However, AF screening shares the limitations  
49  
50 of screening with other diagnostic tests. The screening tool must have high sensitivity, and needs to  
51  
52 be inexpensive and cost effective. We also need to minimize and have a method of addressing false  
53  
54 positives. Current guidelines recommend opportunistic screening using pulse palpation and 12 lead  
55  
56 ECG.<sup>11</sup> In a previous systematic review this was associated with a new AF detection rate of  
57  
58  
59

1  
2  
3 approximately 1%.<sup>5</sup> Pulse palpation may be non-specific in patients with other irregular rhythms  
4 such as ventricular ectopy, and 12 lead ECG is only able to capture a single timepoint for screening.  
5  
6 There are multiple other methods for AF detection. Continuous Holter monitoring is probably the  
7 most commonly used in clinical practice, especially in stroke cohorts. It has the potential advantage  
8 of assessing heart rhythm throughout the day and may be useful in detecting nocturnal subclinical  
9 AF. However, the disadvantages include the cost of Holter monitoring (especially for mass  
10 screening), the inconvenience of leads and electrodes (which may affect compliance), and typical  
11 limitation to 1-2 days of capture (as extended periods are more cumbersome and less cost-effective.  
12  
13 Other event recorders are again expensive and limited to symptomatic patients. Extended period  
14 monitoring using implantable devices have shown promise in the cryptogenic stroke population  
15 (where many have been diagnosed with paroxysmal AF),<sup>70</sup> but they are invasive and not feasible for  
16 mass screening.  
17

18  
19 Portable single lead ECG devices permit multiple 30-60 second recordings to be captured, and  
20 downloaded to a computer. These devices have several potential advantages over Holter monitoring.  
21 They are leadless and require finger contact (and are hence easy to use and acceptable to patients).  
22 They have a high degree of sensitivity for identifying AF.<sup>71-73</sup> Most interface with a web-based cloud  
23 system where ECG rhythms can be wirelessly transferred to clinicians, allowing rapid analysis and  
24 diagnosis. The development of automated algorithms to detect AF is helpful for mass screening. In  
25 two small studies they have demonstrated superior AF detection compared with 24 hour Holter  
26 monitoring.<sup>66 67</sup> Although screening using these portable devices are currently not in the latest AF  
27 guidelines, they may offer a feasible option for mass screening. Screening using these devices has  
28 been demonstrated to be cost effective.<sup>74 75</sup>  
29

30  
31 We noted a moderate linear association between monitoring time and AF detection rate. Single  
32 timepoint screening for 30-60 sec achieved an overall detection rate of approximately 1%. This is no  
33 better than what has been reported using pulse palpation or 12 lead ECG, hence does not add any  
34 incremental benefit in screening programs<sup>5</sup>. Multiple intermittent recordings improve AF detection;  
35 we found that at least 19 minutes of total monitoring should be performed to achieve detection rates  
36 similar to 24 Holter monitoring.  
37  
38  
39  
40  
41  
42  
43  
44  
45  
46  
47  
48  
49  
50  
51  
52  
53  
54  
55  
56  
57  
58  
59  
60

1  
2  
3 The linear relationship between monitoring time and AF detection rate ( $R^2=0.80$ ) and the  
4 reproduction of AF detection rates of 24 hour Holter monitoring with only 12 minutes of intermittent  
5 monitoring was possible in our study only after exclusion of an outlier.<sup>64</sup> Despite the inclusion of  
6 elderly participants with at least one risk factor for AF, the use of a validated single lead ECG device  
7 and a prolonged monitoring period, that study had a lower AF detection rate (3.8%) than the  
8 remaining studies, even using a shorter monitoring period.<sup>53 56 57</sup> Relatively low rates of adherence  
9 (only approximately 25% completed 2 x 30 second ECG recordings every week for the full year of  
10 monitoring) may be a potential explanation for the lower AF detection rate noted.<sup>64</sup>

11  
12  
13  
14  
15  
16  
17  
18 **Limitations:** There are several challenges inherent in this meta-analysis of studies investigating AF  
19 detection. The most important is the target screening population. Most studies did not report the  
20 CHADS or CHA<sub>2</sub>DS<sub>2</sub>-VASC score, a history of previous stroke, or other co-morbidities.  
21 Consequently, it was difficult to ascertain if the risk profiles of patients in these studies were  
22 equivalent. Most Holter monitoring studies were performed in the stroke population – which is likely  
23 a population with higher AF risk than many studies using portable ECG devices, which recruited  
24 mainly healthy participants or those with AF risk factors from the community. The significant  
25 heterogeneity amongst both Holter and portable ECG device studies make it difficult to perform  
26 direct comparisons between both groups. The type/duration of monitoring and type of device used  
27 will also influence the overall AF detection rate and varied significantly between studies. There are  
28 several possible confounders which may not have been taken into account. The validity of the linear  
29 regression analysis comparing detection time and rate may be limited due to the significant  
30 differences in study population, study design and AF definitions. However, despite these limitations,  
31 the analysis may provide some important inferences into AF screening. Multiple intermittent ECG  
32 recordings achieved a similar AF detection rate to 24 hour Holter monitoring. This may suggest that  
33 in a similar cohort of patients with the same comorbidities, single lead intermittent monitoring may  
34 be superior for AF detection.

35  
36  
37  
38  
39  
40  
41  
42  
43  
44  
45  
46  
47  
48  
49  
50  
51  
52 Compared to 24-hour continuous monitoring, single lead portable ECG monitoring is more patient  
53 dependent. Good patient compliance is essential to obtain multiple readings across different  
54 timepoints which improves sensitivity. The analysis performed does not take into account patient  
55  
56  
57  
58  
59  
60

1  
2  
3 compliance as this is difficult to assess and poorly reported across the individual studies. Most single  
4 lead device manufacturers have proprietary automated AF detection algorithms which were used for  
5 diagnosis. Not all of these algorithms have had rigorous testing and comparison to a reference  
6 standard. It is also difficult to distinguish AF from other supraventricular tachycardias using single  
7 lead ECG devices as the P wave is often not readily discernible. The use of different automated  
8 algorithms makes AF definitions non-standardized and can potentially create issues with both over  
9 and underdiagnoses.

10  
11 There are other limitations in this analysis. The efficacy of intermittent monitoring is critically  
12 dependent on AF burden and density. All studies varied in their monitoring period and strategy. The  
13 linear regression model used was able to determine a total intermittent monitoring time which  
14 produced similar AF detection rates to 24-hour continuous monitoring. However, it is difficult to  
15 translate the total monitoring time into an effective monitoring strategy. For example, we are unable  
16 to determine from our analysis if 12 x 60 second recordings over 12 consecutive days is different to  
17 2 x 60 second recordings daily for 6 consecutive days. The definitions of AF also vary between  
18 studies. Many are based on individual physician interpretation and criteria for diagnosis were not  
19 explicitly specified. The duration of AF varied from 10-30 seconds between studies, although a cut-  
20 off of 30 seconds, was the most widely adopted practice.

21  
22 **Conclusion:** Single lead portable ECG devices may offer an efficient screening option for AF  
23 compared to 24 hr. Holter monitoring. Total monitoring time is related with AF detection and a total  
24 of 19 minutes may achieve a similar detection rate to 24 hour Holter monitoring.

25  
26  
27  
28  
29  
30  
31  
32  
33  
34  
35  
36  
37  
38  
39  
40  
41  
42  
43  
44  
45  
46  
47 **Contributors:** SR – Performed the literature search and analysis of individual studies. Involved in  
48 the statistical analysis, manuscript preparation and editing. TM – Is guarantor. Developed project  
49 idea/rationale. Involved in data analysis and manuscript preparation and editing. NN – Involved in  
50 data and statistical analysis as well as manuscript preparation and editing. DD – Performed the  
51 literature search and analysis of individual studies. Involved in the manuscript preparation and



1  
2  
3 editing. DP – Involved in analysis of individual studies and statistical analysis. Involved in  
4 manuscript preparation and editing. JK – involved in the project outline, data analysis, manuscript  
5 preparation and editing. JK – involved in the project outline, data analysis, manuscript  
6 preparation and editing.  
7  
8  
9

10  
11 **Data Sharing:** There are no remaining unpublished data  
12  
13  
14  
15  
16  
17  
18  
19  
20  
21  
22  
23  
24  
25

### 26 **BMJ Group declaration of interests statement**

27 I have read and understood the BMJ Group policy on declaration of interests and declare the  
28 following interests: *[list them or state “none”]*.  
29

30 Date – 05/01/2018

31 Name:

32 Satish Ramkumar

33 Receives equipment and software support from Semacare Inc, a manufacturer of handheld ECG  
34 devices. The sponsors had no role in the design and conduct of the study, in the collection, analysis,  
35 and interpretation of the data, and in the preparation, review, or approval of the manuscript.  
36

37 Receives research scholarships from the Heart Foundation and Avant  
38

39 Thomas H Marwick

40 Receives equipment and software support from Semacare Inc, a manufacturer of handheld ECG  
41 devices. The sponsors had no role in the design and conduct of the study, in the collection, analysis,  
42 and interpretation of the data, and in the preparation, review, or approval of the manuscript.  
43

44 Nitesh Nerlekar – none

45 Daniel D’Souza – none

46 Derek J Pol – none

47 Jonathan M Kalman - none  
48  
49  
50  
51  
52  
53  
54  
55  
56  
57  
58  
59  
60

## References

1. Krahn AD, Manfreda J, Tate RB, et al. The natural history of atrial fibrillation: incidence, risk factors, and prognosis in the Manitoba Follow-Up Study. *The American Journal of Medicine* 1995;98(5):476-84.
2. Vidaillet H, Granada JF, Chyou P-H, et al. A population-based study of mortality among patients with atrial fibrillation or flutter. *The American Journal of Medicine* 2002;113(5):365-70.
3. Kim MH, Johnston SS, Chu B-C, et al. Estimation of total incremental health care costs in patients with atrial fibrillation in the United States. *Circulation: Cardiovascular Quality and Outcomes* 2011;4(3):313-20.
4. Leyden JM, Kleinig TJ, Newbury J, et al. Adelaide stroke incidence study: declining stroke rates but many preventable cardioembolic strokes. *Stroke* 2013;44(5):1226-31. doi: 10.1161/strokeaha.113.675140 [published Online First: 2013/03/14]
5. Lowres N, Neubeck L, Redfern J, et al. Screening to identify unknown atrial fibrillation: A systematic review. *Thrombosis and Haemostasis* 2013;110(2):213-22. doi: <http://dx.doi.org/10.1160/TH13-02-0165>
6. Watanabe H, Tanabe N, Watanabe T, et al. Metabolic syndrome and risk of development of atrial fibrillation. *Circulation* 2008;117(10):1255-60.
7. Ball J, Thompson DR, Ski CF, et al. Estimating the current and future prevalence of atrial fibrillation in the Australian adult population. *Med J Aust* 2015;202(1):32-5.

- 1
- 2
- 3 8. Dagues N, Anastasiou-Nana M. Atrial Fibrillation and Obesity. *Journal of the American*
- 4 *College of Cardiology* 2010;55(21):2328-29. doi: 10.1016/j.jacc.2010.01.045
- 5
- 6 9. Sposato LA, Cipriano LE, Saposnik G, et al. Diagnosis of atrial fibrillation after stroke
- 7 and transient ischaemic attack: a systematic review and meta-analysis. *Lancet neurol*
- 8 2015;14(4):377-87. doi: [https://dx.doi.org/10.1016/S1474-4422\(15\)70027-X](https://dx.doi.org/10.1016/S1474-4422(15)70027-X)
- 9
- 10
- 11 10. Pathak RK, Middeldorp ME, Lau DH, et al. Aggressive risk factor reduction study for
- 12 atrial fibrillation and implications for the outcome of ablation: the ARREST-AF cohort
- 13 study. *Journal of the American College of Cardiology* 2014;64(21):2222-31.
- 14
- 15 11. Kirchhof P, Benussi S, Kotecha D, et al. 2016 ESC Guidelines for the management of
- 16 atrial fibrillation developed in collaboration with EACTS. *European Heart Journal*
- 17 2016;37(38):2893-962. doi: 10.1093/eurheartj/ehw210
- 18
- 19
- 20 12. Martinez C, Katholing A, Freedman SB. Adverse prognosis of incidentally detected
- 21 ambulatory atrial fibrillation. *Thrombosis and haemostasis* 2014;112(2):276-86.
- 22
- 23 13. Lau J, Lowres N, Neubeck L, et al. Performance of an automated iPhone ECG algorithm
- 24 to diagnose atrial fibrillation in a community AF screening program (search-AF). *Heart*
- 25 *Lung and Circulation* 2013;22:S205. doi: <http://dx.doi.org/10.1016/j.hlc.2013.05.488>
- 26
- 27
- 28 14. Doliwa PS, Frykman V, Rosenqvist M. Short-term ECG for out of hospital detection of
- 29 silent atrial fibrillation episodes. *Scandinavian Cardiovascular Journal* 2009;43(3):163-68.
- 30
- 31
- 32 15. Chan PH, Wong CK, Poh YC, et al. Diagnostic performance of a smartphone-based
- 33 photoplethysmographic application for atrial fibrillation screening in a primary care
- 34 setting. *Journal of the American Heart Association* 2016;5(e003428):e003428.
- 35
- 36 16. Moher D, Liberati A, Tetzlaff J, et al. Preferred reporting items for systematic reviews
- 37 and meta-analyses: the PRISMA statement. *PLoS medicine* 2009;6(7):e1000097.
- 38
- 39
- 40 17. Downs SH, Black N. The feasibility of creating a checklist for the assessment of the
- 41 methodological quality both of randomised and non-randomised studies of health care
- 42 interventions. *Journal of Epidemiology and Community Health* 1998;52(6):377-84. doi:
- 43 10.1136/jech.52.6.377
- 44
- 45 18. Gladstone DJ, Spring M, Dorian P, et al. Atrial fibrillation in patients with cryptogenic
- 46 stroke. *New England Journal of Medicine* 2014;370(26):2467-77.
- 47
- 48 19. Barthélémy JC, Féasson-Gérard S, Garnier P, et al. Automatic cardiac event recorders
- 49 reveal paroxysmal atrial fibrillation after unexplained strokes or transient ischemic attacks.
- 50 *Annals of Noninvasive Electrocardiology* 2003;8(3):194-99.
- 51
- 52 20. Jabaudon D, Sztajzel J, Sievert K, et al. Usefulness of ambulatory 7-day ECG monitoring
- 53 for the detection of atrial fibrillation and flutter after acute stroke and transient ischemic
- 54 attack. *Stroke* 2004;35(7):1647-51. doi: <https://dx.doi.org/10.1161/01.STR.0000131269.69502.d9>
- 55
- 56
- 57
- 58
- 59

- 1  
2  
3  
4 21. Koudstaal PJ, van Gijn J, Klootwijk A, et al. Holter monitoring in patients with transient  
5 and focal ischemic attacks of the brain. *Stroke* 1986;17(2):192-95.  
6  
7  
8 22. Hornig C, Haberbosch W, Lammers C, et al. Specific cardiological evaluation after focal  
9 cerebral ischemia. *Acta Neurologica Scandinavica* 1996;93(4):297-302.  
10  
11 23. Rizos T, Güntner J, Jenetzky E, et al. Continuous stroke unit electrocardiographic  
12 monitoring versus 24-hour Holter electrocardiography for detection of paroxysmal atrial  
13 fibrillation after stroke. *Stroke* 2012;43(10):2689-94.  
14  
15  
16 24. Schuchert A, Behrens G, Meinertz T. Impact of long-term ECG recording on the  
17 detection of paroxysmal atrial fibrillation in patients after an acute ischemic stroke. *Pacing*  
18 *Clin Electrophysiol* 1999;22(7):1082-4.  
19  
20 25. Schaer B, Sticherling C, Lyrer P, et al. Cardiological diagnostic work-up in stroke  
21 patients—a comprehensive study of test results and therapeutic implications. *European*  
22 *Journal of Neurology* 2009;16(2):268-73.  
23 26. Schaer B, Zellweger M, Cron T, et al. Value of routine Holter monitoring for the  
24 detection of paroxysmal atrial fibrillation in patients with cerebral ischemic events. *Stroke*  
25 2004;35(3):e68-e70.  
26  
27  
28 27. Shafqat S, Kelly P, Furie K. Holter monitoring in the diagnosis of stroke mechanism.  
29 *Internal Medicine Journal* 2004;34(6):305-09.  
30  
31  
32 28. Lazzaro MA, Krishnan K, Prabhakaran S. Detection of atrial fibrillation with concurrent  
33 holter monitoring and continuous cardiac telemetry following ischemic stroke and  
34 transient ischemic attack. *J Stroke Cerebrovasc Dis* 2012;21(2):89-93. doi:  
35 <https://dx.doi.org/10.1016/j.jstrokecerebrovasdis.2010.05.006>  
36  
37  
38 29. Grond M, Jauss M, Hamann G, et al. Improved detection of silent atrial fibrillation  
39 using 72-hour Holter ECG in patients with ischemic stroke. *Stroke* 2013;44(12):3357-64.  
40  
41  
42 30. Stahrenberg R, Weber-Kruger M, Seegers J, et al. Enhanced detection of paroxysmal  
43 atrial fibrillation by early and prolonged continuous holter monitoring in patients with  
44 cerebral ischemia presenting in sinus rhythm. *Stroke* 2010;41(12):2884-88. doi:  
45 <http://dx.doi.org/10.1161/STROKEAHA.110.591958>  
46  
47  
48 31. Ritter MA, Kochhauser S, Duning T, et al. Occult atrial fibrillation in cryptogenic stroke:  
49 detection by 7-day electrocardiogram versus implantable cardiac monitors. *Stroke*  
50 2013;44(5):1449-52. doi: <https://dx.doi.org/10.1161/STROKEAHA.111.676189>  
51  
52 32. Higgins P, MacFarlane PW, Dawson J, et al. Noninvasive cardiac event monitoring to  
53 detect atrial fibrillation after ischemic stroke: a randomized, controlled trial. *Stroke*  
54 2013;44(9):2525-31. doi: <https://dx.doi.org/10.1161/STROKEAHA.113.001927>  
55  
56  
57  
58  
59  
60

- 1  
2  
3 33. Thakkar S, Bagarhatta R. Detection of paroxysmal atrial fibrillation or flutter in patients  
4 with acute ischemic stroke or transient ischemic attack by Holter monitoring. *Indian Heart*  
5 *Journal* 2014;66(2):188-92.  
6  
7  
8 34. Wachter R, Gröschel K, Gelbrich G, et al. Holter-electrocardiogram-monitoring in  
9 patients with acute ischaemic stroke (Find-AF RANDOMISED): an open-label randomised  
10 controlled trial. *Lancet neurol* 2017;16(4):282-90.  
11  
12 35. Gumbinger C, Krumsdorf U, Veltkamp R, et al. Continuous monitoring versus  
13 HOLTER ECG for detection of atrial fibrillation in patients with stroke. *European Journal of*  
14 *Neurology* 2012;19(2):253-7. doi: <https://dx.doi.org/10.1111/j.1468-1331.2011.03519.x>  
15  
16  
17 36. Alhadramy O, Jeerakathil TJ, Majumdar SR, et al. Prevalence and predictors of  
18 paroxysmal atrial fibrillation on Holter monitor in patients with stroke or transient  
19 ischemic attack. *Stroke* 2010;41(11):2596-600. doi:  
20 <https://dx.doi.org/10.1161/STROKEAHA.109.570382>  
21  
22  
23 37. Dangayach NS, Kane K, Moonis M. Paroxysmal atrial fibrillation in cryptogenic stroke.  
24 *Therapeutics and Clinical Risk Management* 2011;7(1):33-37. doi:  
25 <http://dx.doi.org/10.2147/TCRM.S15079>  
26  
27  
28 38. Gunalp M, Atalar E, Coskun F, et al. Holter monitoring for 24 hours in patients with  
29 thromboembolic stroke and sinus rhythm diagnosed in the emergency department.  
30 *Advances in Therapy* 2006;23(6):854-60.  
31  
32  
33 39. Fonseca AC, Brito D, Pinho e Melo T, et al. N-terminal pro-brain natriuretic peptide  
34 shows diagnostic accuracy for detecting atrial fibrillation in cryptogenic stroke patients.  
35 *International Journal of Stroke* 2014;9(4):419-25. doi: <http://dx.doi.org/10.1111/ijis.12126>  
36  
37  
38 40. Manina G, Agnelli G, Becattini C, et al. 96 hours ECG monitoring for patients with  
39 ischemic cryptogenic stroke or transient ischaemic attack. *Intern* 2014;9(1):65-7. doi:  
40 <https://dx.doi.org/10.1007/s11739-012-0755-3>  
41  
42  
43 41. Tagawa M, Takeuchi S, Chinushi M, et al. Evaluating patients with acute ischemic  
44 stroke with special reference to newly developed atrial fibrillation in cerebral embolism.  
45 *Pacing and Clinical Electrophysiology* 2007;30(9):1121-28.  
46  
47  
48 42. Shibazaki K, Kimura K, Fujii S, et al. Brain natriuretic peptide levels as a predictor for  
49 new atrial fibrillation during hospitalization in patients with acute ischemic stroke. *The*  
50 *American Journal of Cardiology* 2012;109(9):1303-07.  
51  
52  
53 43. Vandenbroucke E, Thijs V. Diagnostic and therapeutic impact of ambulatory  
54 electrocardiography in acute stroke. *Acta Neurologica Belgica* 2004;104(1):27-31.  
55  
56  
57 44. Yodogawa K, Seino Y, Ohara T, et al. Prediction of atrial fibrillation after ischemic  
58 stroke using P-wave signal averaged electrocardiography. *Journal of Cardiology*  
59 2013;61(1):49-52.  
60

- 1  
2  
3  
4 45. Atmuri K, Hughes A, Coles D, et al. The role of cardiac disease parameters in predicting  
5 the results of Holter monitoring in patients with acute ischaemic stroke. *J Clin Neurosci*  
6 2012;19(7):965-68.  
7
- 8  
9 46. Salvatori V, Becattini C, Laureti S, et al. Holter monitoring to detect silent atrial  
10 fibrillation in high-risk subjects: the Perugia General Practitioner Study. *Intern*  
11 2015;10(5):595-601. doi: <https://dx.doi.org/10.1007/s11739-015-1241-5>  
12
- 13  
14 47. Beaulieu-Boire I, Leblanc N, Berger L, et al. Troponin elevation predicts atrial  
15 fibrillation in patients with stroke or transient ischemic attack. *Journal of Stroke and*  
16 *Cerebrovascular Diseases* 2013;22(7):978-83. doi:  
17 <http://dx.doi.org/10.1016/j.jstrokecerebrovasdis.2012.01.008>  
18
- 19  
20 48. Dogan U, Dogan EA, Tekinalp M, et al. P-wave dispersion for predicting paroxysmal  
21 atrial fibrillation in acute ischemic stroke. *International Journal of Medical Sciences* 2012;9(1  
22 ):108.  
23
- 24 49. Douen AG, Pageau N, Medic S. Serial electrocardiographic assessments significantly  
25 improve detection of atrial fibrillation 2.6-fold in patients with acute stroke. *Stroke*  
26 2008;39(2):480-2. doi: <https://dx.doi.org/10.1161/STROKEAHA.107.492595>  
27
- 28 50. Suissa L, Bresch S, Lachaud S, et al. Optimal timing and duration of continuous ECG  
29 monitoring for detecting atrial fibrillation in stroke patients. *Archives of Cardiovascular*  
30 *Diseases Supplements* 2012;4:43-44.  
31
- 32 51. Wohlfahrt J, Stahrenberg R, Weber-Kruger M, et al. Clinical predictors to identify  
33 paroxysmal atrial fibrillation after ischaemic stroke. *European Journal of Neurology*  
34 2014;21(1):21-7. doi: <https://dx.doi.org/10.1111/ene.12198>  
35
- 36  
37 52. Lowres N, Neubeck L, Salkeld G, et al. Feasibility and cost-effectiveness of stroke  
38 prevention through community screening for atrial fibrillation using iPhone ECG in  
39 pharmacies: The SEARCH-AF study. *Thrombosis and Haemostasis* 2014;111(6):1167-76. doi:  
40 <http://dx.doi.org/10.1160/TH14-03-0231>  
41
- 42  
43 53. Svennberg E, Engdahl J, Al-Khalili F, et al. Mass screening for untreated atrial  
44 fibrillation: the STROKESTOP study. *Circulation* 2015;131:2176-84.  
45
- 46  
47 54. Proietti M, Mairesse GH, Goethals P, et al. A population screening programme for atrial  
48 fibrillation: a report from the Belgian Heart Rhythm Week screening programme. *Europace*  
49 2016;18:1779-86.  
50
- 51  
52 55. Kaasenbrood F, Hollander M, Rutten FH, et al. Yield of screening for atrial fibrillation in  
53 primary care with a hand-held, single-lead electrocardiogram device during influenza  
54 vaccination. *Europace* 2016;18(10):1514-20. doi: <http://dx.doi.org/10.1093/europace/euv426>  
55
- 56  
57 56. Engdahl J, Andersson L, Mirskaya M, et al. Stepwise Screening of Atrial Fibrillation in a  
58 75-Year-Old Population Clinical Perspective. *Circulation* 2013;127(8):930-37.  
59  
60

- 1  
2  
3  
4 57. Hendrikx T, Hörnsten R, Rosenqvist M, et al. Screening for atrial fibrillation with  
5 baseline and intermittent ECG recording in an out-of-hospital population. *BMC*  
6 *Cardiovascular Disorders* 2013;13(1):41.  
7
- 8  
9 58. Hendrikx T, Sundqvist M, Sandström H, et al. Atrial fibrillation among patients under  
10 investigation for suspected obstructive sleep apnea. *PloS One* 2017;12(2):e0171575.  
11
- 12 59. Chan Ny, Choy Cc. Screening for atrial fibrillation in 13 122 Hong Kong citizens with  
13 smartphone electrocardiogram. *Heart* 2017;103(1):24-31. doi:  
14 <http://dx.doi.org/10.1136/heartjnl-2016-309993>  
15
- 16  
17 60. Ramkumar S, Yang H, Wang Y, et al. The Role of Left Atrial and Ventricular Function in  
18 Prediction of Atrial Fibrillation: P2-19. *Journal of the American Society of Echocardiography*  
19 2017;30(6):B70.
- 20 61. Claes N, Goethals M, Goethals P, et al. Screening for Atrial Fibrillation (AF) in Belgium:  
21 A multicentre trial. *European Journal of Cardiovascular Prevention and Rehabilitation*  
22 2011;1):S30. doi: <http://dx.doi.org/10.1177/1741826711407000>  
23
- 24  
25 62. Samol A, Masin M, Gellner R, et al. Prevalence of unknown atrial fibrillation in patients  
26 with risk factors. *Europace* 2013;15(5):657-62.  
27
- 28  
29 63. Battipaglia I, Gilbert K, Hogarth AJ, et al. Screening for atrial fibrillation in the  
30 community using a novel ECG recorder. *Journal of Atrial Fibrillation* 2016;9(2):29-31.  
31
- 32 64. Halcox JP, Wareham K, Cardew A, et al. Assessment of Remote Heart Rhythm  
33 Sampling Using the AliveCor Heart Monitor to Screen for Atrial Fibrillation: The  
34 REHEARSE-AF Study. *Circulation* 2017:CIRCULATIONAHA. 117.030583.  
35
- 36  
37 65. Chan, Ny, Siu Cw, Choy Cc et. al. Effectiveness of community atrial fibrillation  
38 screening in over 10,000 citizens using smartphone electrocardiogram- The AFinder  
39 program. ESC Congress; 2017 29th August Barcelona.  
40
- 41 66. Doliwa Sobocinski P, Änggårdh Rooth E, Frykman Kull V, et al. Improved screening for  
42 silent atrial fibrillation after ischaemic stroke. *EP Europace* 2012;14(8):1112-16.  
43
- 44  
45 67. Hendrikx T, Rosenqvist M, Wester P, et al. Intermittent short ECG recording is more  
46 effective than 24-hour Holter ECG in detection of arrhythmias. *BMC Cardiovascular*  
47 *Disorders* 2014;14(1):41.  
48
- 49  
50 68. Stewart S, Murphy N, Walker A, et al. Cost of an emerging epidemic: an economic  
51 analysis of atrial fibrillation in the UK. *Heart* 2004;90(3):286-92. doi: 10.1136/hrt.2002.008748  
52
- 53 69. Healey JS, Connolly SJ, Gold MR, et al. Subclinical Atrial Fibrillation and the Risk of  
54 Stroke. *New England Journal of Medicine* 2012;366(2):120-29. doi: 10.1056/NEJMoa1105575  
55  
56  
57  
58  
59

- 1  
2  
3 70. Sanna T, Diener HC, Passman RS, et al. Cryptogenic stroke and underlying atrial  
4 fibrillation. *New England Journal of Medicine* 2014;370(26):2478-86. doi:  
5 <http://dx.doi.org/10.1056/NEJMoa1313600>  
6  
7  
8 71. Desteghe L, Raymaekers Z, Lutin M, et al. Performance of handheld electrocardiogram  
9 devices to detect atrial fibrillation in a cardiology and geriatric ward setting. *Europace*  
10 2016:euw025.  
11  
12 72. Williams J, Pearce K, Benett I, et al. The effectiveness of a mobile ECG device in  
13 identifying AF: sensitivity, specificity and predictive value. *British Journal of Cardiology*  
14 2015;22(2)  
15  
16  
17 73. Freedman SB, Lowres N. Asymptomatic atrial fibrillation: the case for screening to  
18 prevent stroke. *JAMA* 2015;314(18):1911-12.  
19 74. Aronsson M, Svennberg E, Rosenqvist M, et al. Cost-effectiveness of mass screening for  
20 untreated atrial fibrillation using intermittent ECG recording. *EP Europace* 2015;17(7):1023-  
21 29. doi: 10.1093/europace/euv083  
22  
23  
24 75. Jacobs MS, Kaasenbrood F, Postma MJ, et al. Cost-effectiveness of screening for atrial  
25 fibrillation in primary care with a handheld, single-lead electrocardiogram device in the  
26 Netherlands. *Europace* 2016:euw285.  
27  
28  
29  
30  
31  
32  
33  
34  
35  
36  
37  
38  
39  
40  
41  
42  
43  
44  
45  
46  
47  
48  
49  
50  
51  
52  
53  
54  
55  
56  
57  
58  
59  
60



**Figure Legends**

Figure 1 – Overview of inclusion and exclusion of studies based on the PRISMA flowchart

Figure 2 – Forest Plot showing the overall AF detection rate between single lead ECG devices and Holter monitoring

Figure 3 – Forest Plot comparing the AF detection rate between 24 hour Holter monitoring and performing multiple intermittent single lead ECG recordings

Figure 4 – Graph showing the linear relationship between total monitoring time and AF detection rate in single lead ECG devices

Figure 5 – Cumulative Meta-analysis showing minimal variation in AF detection over time using Holter and single lead ECG devices.

Supplementary Figure 1 – Funnel Plots for Holter monitoring and single lead ECG device studies

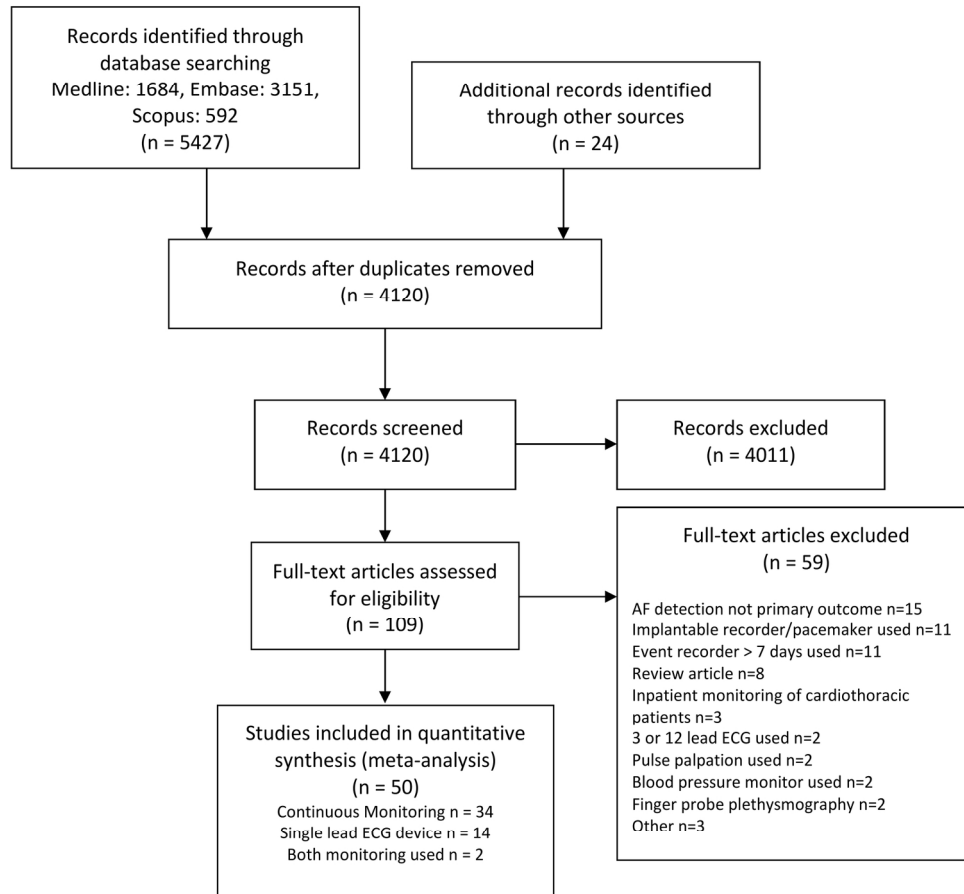

Figure 1

170x163mm (300 x 300 DPI)

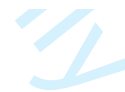

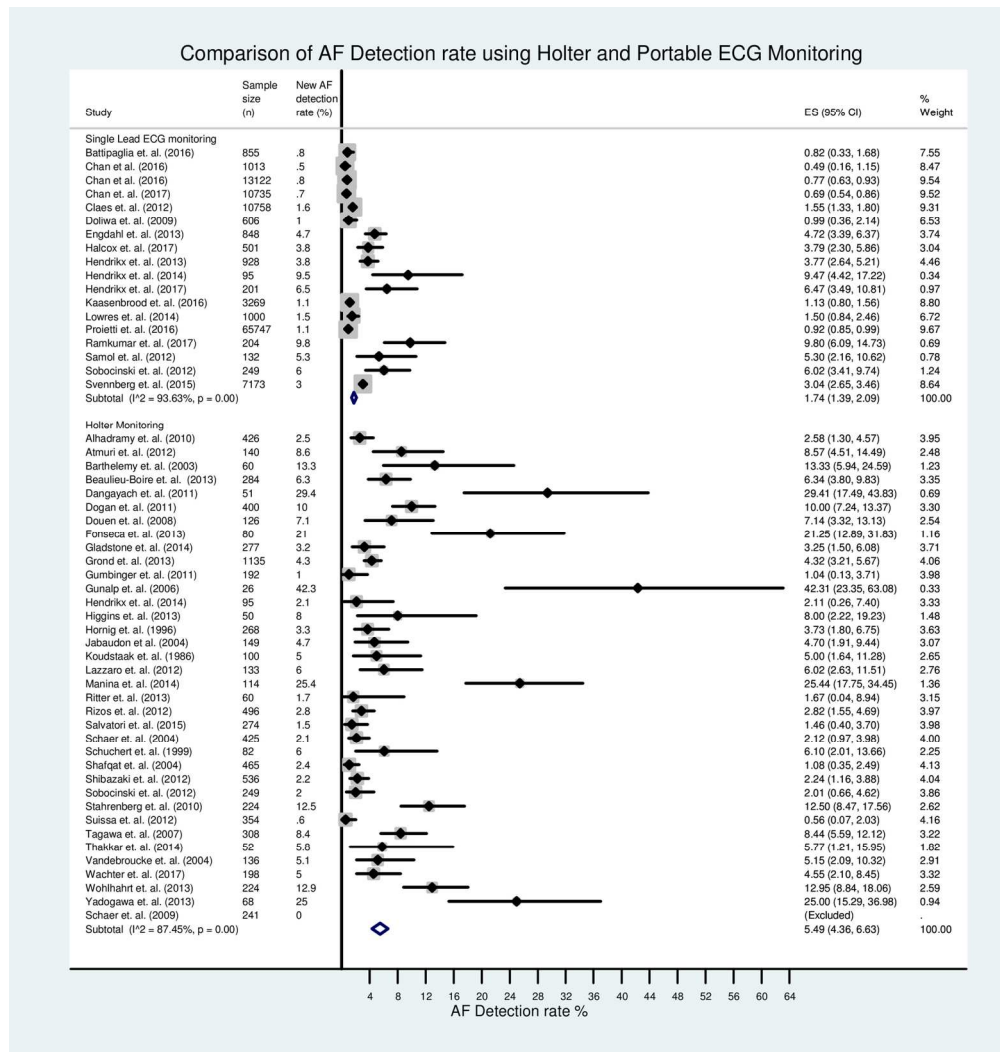

Figure 2

152x159mm (300 x 300 DPI)



Figure 3

201x183mm (300 x 300 DPI)

1  
2  
3  
4  
5  
6  
7  
8  
9  
10  
11  
12  
13  
14  
15  
16  
17  
18  
19  
20  
21  
22  
23  
24  
25  
26  
27  
28  
29  
30  
31  
32  
33  
34  
35  
36  
37  
38  
39  
40  
41  
42  
43  
44  
45  
46  
47  
48  
49  
50  
51  
52  
53  
54  
55  
56  
57  
58  
59  
60

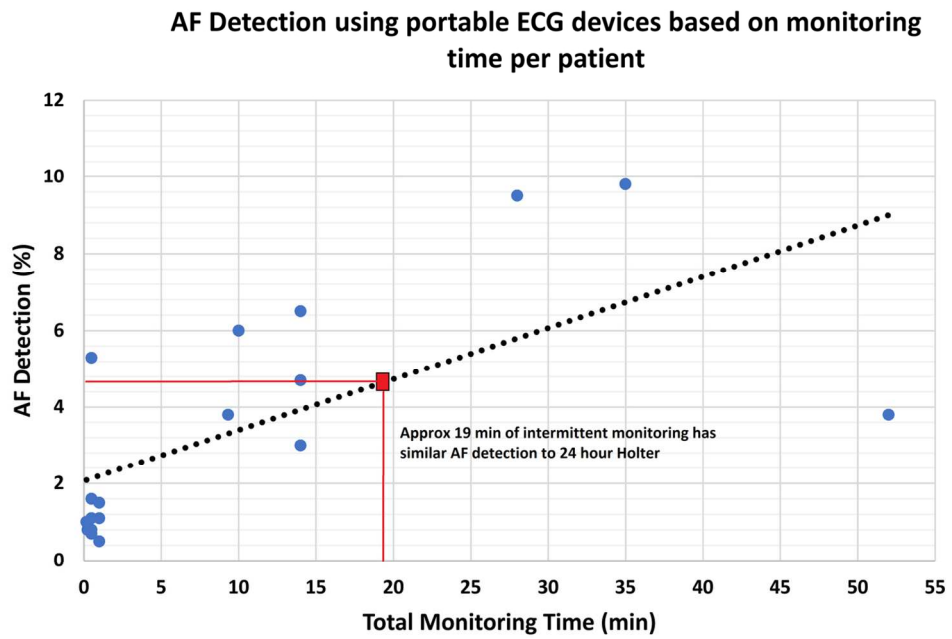

Figure 4

125x84mm (300 x 300 DPI)

Cumulative random-effects meta-analysis of AF Detection using Holter and Portable ECG Monitoring



Figure 5

203x241mm (300 x 300 DPI)

## Supplementary Table 1.

Database: Ovid MEDLINE

Search Strategy:

- 
- 1 exp Atrial Fibrillation/ (46578)
  - 2 atrial fibrillation.tw. (48670)
  - 3 AF.tw. (26772)
  - 4 Mass Screening/ (94291)
  - 5 1 or 2 or 3 (69465)
  - 6 screening.tw. (382365)
  - 7 Monitoring, Ambulatory/ (7308)
  - 8 Electrocardiography/ (185379)
  - 9 Electrocardiography, Ambulatory/ or Arrhythmias, Cardiac/ or Electrocardiography/ (232205)
  - 10 monitoring.tw. (353950)
  - 11 Diagnosis/ (17394)
  - 12 electrocardiography.tw. (11752)
  - 13 ECG.tw. (52917)
  - 14 7 or 8 or 9 or 12 or 13 (258115)
  - 15 4 or 6 or 10 or 11 (769528)
  - 16 5 and 14 and 15 (1684)
-

Supplementary Table 2.

| Author                | Year | Reason for exclusion                                                                      |
|-----------------------|------|-------------------------------------------------------------------------------------------|
| Barrett et. al.       | 2014 | Primary outcome not AF detection                                                          |
| Bhatt et. al.         | 2011 | 28 day event recorder used for AF detection                                               |
| Kamel et. al.         | 2013 | 21 day mobile cardiac outpatient telemetry unit used for AF detection                     |
| Miller et. al.        | 2013 | 30 day mobile cardiac outpatient telemetry unit used for AF detection                     |
| Rabenstein et. al.    | 2013 | 21 day mobile cardiac outpatient telemetry unit used for AF detection                     |
| Tayal et. al.         | 2008 | 21 day mobile cardiac outpatient telemetry unit used for AF detection                     |
| Flint et. al.         | 2012 | 30 day event recorder used for AF detection                                               |
| Christensen et. al.   | 2014 | Implantable loop recorder used for AF detection                                           |
| Cotter et. al.        | 2013 | Implantable loop recorder used for AF detection                                           |
| Dion et. al.          | 2010 | Implantable loop recorder used for AF detection                                           |
| Sanna et. al.         | 2014 | Implantable cardiac monitor used for AF detection                                         |
| Merce et. al.         | 2013 | Implantable loop recorder used for AF detection                                           |
| Elijovich et. al.     | 2009 | 30 day event recorder used for AF detection                                               |
| Wallmann et. al.      | 2007 | Serial 7 day event recorders used for AF detection                                        |
| Kral et. al.          | 2015 | Substudy (poster) only investigating patients <40 yrs                                     |
| Lip et. al.           | 2016 | AF detection not primary objective                                                        |
| Anczykowski et. al.   | 2016 | Trans-telephonic event recorder used for arrhythmia detection                             |
| Baturova et. al.      | 2016 | AF detection not primary objective                                                        |
| Yu et. al.            | 2009 | Retrospective review with missing demographic data and AF detection not primary objective |
| Destaghe et. al.      | 2016 | Primary purpose was assessing test performance of 2 different ECG devices                 |
| Lowres et. al.        | 2016 | Post cardiothoracic surgery patients with known episode of AF post-op                     |
| Benito et. al.        | 2015 | 12 lead ECG used for screening                                                            |
| Bury et. al.          | 2012 | 3 lead ECG used for screening                                                             |
| Turakhia et. al.      | 2015 | Wearable patch used for ambulatory monitoring                                             |
| Tieleman et. al.      | 2014 | AF screening not primary objective                                                        |
| Rabenstein et. al.    | 2015 | Review article                                                                            |
| Sposato et. al.       | 2015 | Review article                                                                            |
| Schnabel et. al.      | 2009 | Main aim was to develop an AF risk score                                                  |
| Chamberlain et. al.   | 2011 | Main aim was to develop an AF risk score                                                  |
| Lowres et. al.        | 2013 | Review article                                                                            |
| de Vito et. al.       | 2014 | AF in post orthopaedic surgery patients with inpatient monitoring                         |
| Magee et. al.         | 2007 | Post cardiothoracic surgery patients with inpatient monitoring                            |
| Her et. al.           | 2013 | Post cardiothoracic surgery patients with inpatient monitoring                            |
| Freedman et. al.      | 2016 | Editorial article                                                                         |
| Turakhia et. al.      | 2016 | Review article                                                                            |
| Levin et. al.         | 2015 | Cost analysis primary objective                                                           |
| Fitzmaurice et. al.   | 2007 | Pulse palpation used for AF detection                                                     |
| Rhys et. al.          | 2013 | Pulse palpation used for AF detection                                                     |
| Ziegler et. al.       | 2010 | Used implantable devices for AF detection                                                 |
| Akiyama et. al.       | 2017 | Wearable patch used for AF detection                                                      |
| Thom et. al.          | 2016 | Review article                                                                            |
| Engdahl et. al.       | 2017 | Trial design paper                                                                        |
| Rojo-Martinez et. al. | 2013 | Implantable cardiac monitor used for AF detection                                         |



|                   |      |                                                                        |
|-------------------|------|------------------------------------------------------------------------|
| Poisson et. al.   | 2011 | Review article                                                         |
| Etgen et. al.     | 2013 | Implantable cardiac monitor used for AF detection                      |
| Marazzi et. al.   | 2012 | Blood Pressure monitor used for AF detection                           |
| Wiesel et. al.    | 2014 | Blood Pressure monitor used for AF detection                           |
| Lewis et. al.     | 2011 | Finger probe plethysmography used for AF detection                     |
| McManus et. al.   | 2016 | Iphone based plethysmography used for AF detection                     |
| Shanmugam et. al. | 2012 | Heart failure patients with cardiac resynchronization therapy          |
| Keach et. al.     | 2015 | Review article                                                         |
| Borian et, al.    | 2014 | Implantable devices used for AF detection                              |
| Alonso et. al.    | 2013 | Primary aim was to determine clinical score to assess AF risk          |
| Steven et. al.    | 2016 | Trial design paper - wearable sensors for AF detection                 |
| Lau et. al.       | 2013 | Primary aim was to determine accuracy of AF algorithm                  |
| Gaillard et al.   | 2010 | Transtelephonic monitoring used for AF detection                       |
| Orlov et. al.     | 2007 | AF detection based on patients with permanent pacemakers               |
| Martinez et. al.  | 2014 | Primary aim was to determine prognosis of patients with subclinical AF |
| Wang et al.       | 2017 | Trial design paper                                                     |

Supplementary Table 3.

| Study                      | Objective and outcome described | Appropriate reporting of comorbidities | Inclusion criteria specified | Incomplete Outcome Data | Efforts to reduce bias | Limitations discussed | External validity of study discussed |
|----------------------------|---------------------------------|----------------------------------------|------------------------------|-------------------------|------------------------|-----------------------|--------------------------------------|
| Lowres et. al. (2014)      | Yes                             | Yes                                    | Yes                          | No                      | No                     | No                    | Yes                                  |
| Svennberg et. al. (2015)   | Yes                             | Yes                                    | Yes                          | No                      | No                     | Yes                   | Yes                                  |
| Proietti et. al. (2016)    | Yes                             | Yes                                    | Yes                          | No                      | No                     | Yes                   | Yes                                  |
| Kaasenbrood et. al. (2016) | Yes                             | No                                     | Yes                          | Yes                     | No                     | Yes                   | No                                   |
| Engdahl et. al. (2013)     | Yes                             | Yes                                    | Yes                          | Yes                     | Yes                    | Yes                   | Yes                                  |
| Hendrikkx et. al. (2013)   | Yes                             | Yes                                    | Yes                          | No                      | No                     | Yes                   | Yes                                  |
| Hendrikkx et. al. (2014)   | Yes                             | Yes                                    | Yes                          | No                      | No                     | Yes                   | Yes                                  |
| Chan et. al. (2016)        | Yes                             | Yes                                    | Yes                          | Yes                     | No                     | No                    | Yes                                  |
| Sobocinski et. al. (2012)  | Yes                             | Yes                                    | Yes                          | No                      | No                     | Yes                   | Yes                                  |
| Doliwa et. al. (2009)      | Yes                             | No                                     | Yes                          | No                      | No                     | Yes                   | Yes                                  |
| Ramkumar et. al. (2017)    | Yes                             | Yes                                    | Yes                          | No                      | No                     | Yes                   | Yes                                  |
| Hendrikkx et. al. (2017)   | Yes                             | Yes                                    | Yes                          | No                      | No                     | Yes                   | Yes                                  |
| Claes et. al. (2011)       | Yes                             | Yes                                    | Yes                          | Yes                     | No                     | Yes                   | Yes                                  |
| Samol et. al. (2012)       | Yes                             | Yes                                    | Yes                          | No                      | No                     | Yes                   | Yes                                  |
| Battipaglia et. al. (2016) | Yes                             | No                                     | No                           | No                      | Yes                    | Yes                   | Yes                                  |
| Chan et. al. (2016)        | Yes                             | Yes                                    | Yes                          | No                      | Yes                    | Yes                   | Yes                                  |
| Chan et. al. (2017)        | Yes                             | No                                     | Yes                          | No                      | No                     | Yes                   | Yes                                  |
| Halcox et. al. (2017)      | Yes                             | Yes                                    | Yes                          | No                      | No                     | Yes                   | Yes                                  |
| Gladstone et. al. (2014)   | Yes                             | Yes                                    | Yes                          | No                      | Yes                    | Yes                   | Yes                                  |
| Barthelemy et. al. (2003)  | Yes                             | Yes                                    | Yes                          | No                      | Yes                    | No                    | No                                   |
| Jabaudon et. al. (2004)    | Yes                             | Yes                                    | Yes                          | No                      | No                     | No                    | Yes                                  |
| Koudstaal et. al. (1986)   | Yes                             | No                                     | Yes                          | No                      | No                     | No                    | No                                   |
| Hornig et. al. (1996)      | Yes                             | No                                     | Yes                          | No                      | Yes                    | No                    | Yes                                  |
| Rizos et. al. (2012)       | Yes                             | Yes                                    | Yes                          | No                      | Yes                    | Yes                   | Yes                                  |
| Schuchert et. al. (1999)   | Yes                             | No                                     | Yes                          | No                      | No                     | No                    | No                                   |
| Schaer et. al. (2009)      | Yes                             | Yes                                    | Yes                          | No                      | No                     | Yes                   | Yes                                  |
| Schaer et. al. (2004)      | Yes                             | No                                     | Yes                          | No                      | No                     | Yes                   | Yes                                  |
| Shafqat et. al. (2004)     | Yes                             | No                                     | Yes                          | No                      | No                     | No                    | Yes                                  |
| Lazzaro et. al. (2012)     | Yes                             | Yes                                    | Yes                          | No                      | No                     | Yes                   | Yes                                  |
| Grond et. al. (2013)       | Yes                             | Yes                                    | Yes                          | Yes                     | Yes                    | No                    | Yes                                  |
| Stahrenberg et. al. (2010) | Yes                             | Yes                                    | Yes                          | Yes                     | Yes                    | No                    | Yes                                  |
| Ritter et. al. (2013)      | Yes                             | Yes                                    | Yes                          | No                      | No                     | No                    | Yes                                  |
| Higgins et. al. (2013)     | Yes                             | No                                     | Yes                          | No                      | Yes                    | Yes                   | Yes                                  |

|                               |     |     |     |     |     |     |     |
|-------------------------------|-----|-----|-----|-----|-----|-----|-----|
| Thakkar et. al. (2014)        | Yes | Yes | Yes | No  | Yes | Yes | Yes |
| Wachter et. al. (2017)        | Yes |
| Gumbinger et. al. (2012)      | Yes | No  | Yes | No  | Yes | No  | Yes |
| Alhadramy et. al. (2010)      | Yes | Yes | Yes | No  | Yes | Yes | Yes |
| Dangayach et. al. (2011)      | Yes | Yes | Yes | No  | Yes | No  | Yes |
| Gunalp et. al. (2006)         | Yes | No  | Yes | No  | Yes | No  | No  |
| Fonseca et. al. (2013)        | Yes | Yes | Yes | No  | Yes | Yes | Yes |
| Manina et. al. (2014)         | Yes | No  | Yes | No  | Yes | No  | Yes |
| Tagawa et. al. (2007)         | Yes | No  | Yes | No  | Yes | Yes | Yes |
| Shibazaki et. al. (2012)      | Yes | Yes | Yes | No  | Yes | Yes | Yes |
| Vandebroucke et. al. (2004)   | Yes | No  | Yes | No  | No  | Yes | Yes |
| Yodogawa et. al. (2013)       | Yes | No  | Yes | No  | Yes | Yes | Yes |
| Atmuri et. al. (2012)         | Yes | No  | Yes | No  | No  | Yes | Yes |
| Salvatori et. al. (2015)      | Yes | Yes | Yes | No  | Yes | No  | Yes |
| Beaulieu-Boire et. al. (2013) | Yes | Yes | Yes | No  | Yes | Yes | Yes |
| Dogan et. al. (2011)          | Yes | No  | Yes | No  | No  | Yes | No  |
| Douen et. al. (2008)          | Yes | No  | Yes | No  | Yes | No  | No  |
| Suissa et. al. (2012)         | Yes | No  | Yes | No  | Yes | Yes | Yes |
| Wohlhahrt et. al. (2013)      | Yes | Yes | Yes | No  | Yes | Yes | Yes |

1  
2  
3  
4  
5  
6  
7  
8  
9  
10  
11  
12  
13  
14  
15  
16  
17  
18  
19  
20  
21  
22  
23  
24  
25  
26  
27  
28  
29  
30  
31  
32  
33  
34  
35  
36  
37  
38  
39  
40  
41  
42  
43  
44  
45  
46  
47  
48  
49  
50  
51  
52  
53  
54  
55  
56  
57  
58  
59  
60

For peer review only

Supplementary Figure 1.

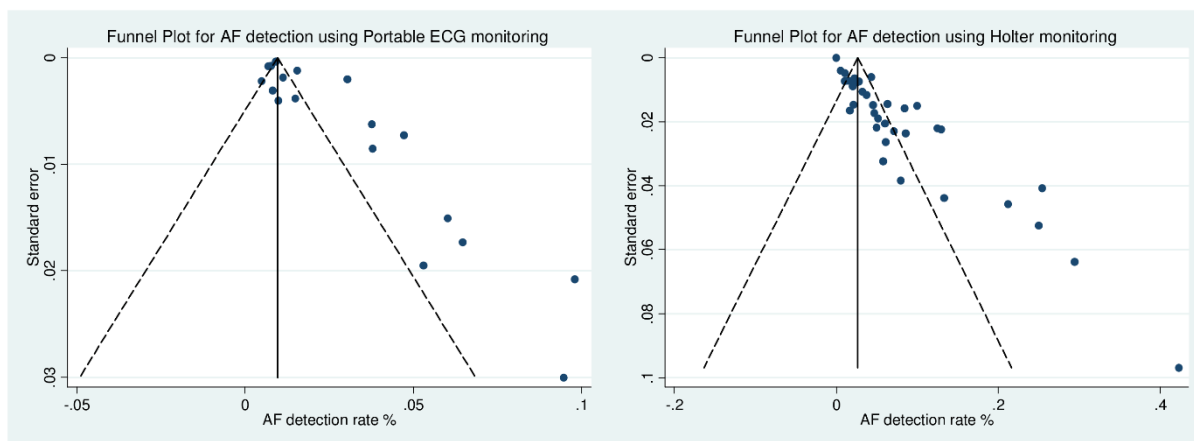

Or peer review only



# PRISMA 2009 Checklist

| Section/topic                      | #  | Checklist item                                                                                                                                                                                                                                                                                              | Reported on page # |
|------------------------------------|----|-------------------------------------------------------------------------------------------------------------------------------------------------------------------------------------------------------------------------------------------------------------------------------------------------------------|--------------------|
| <b>TITLE</b>                       |    |                                                                                                                                                                                                                                                                                                             |                    |
| Title                              | 1  | Identify the report as a systematic review, meta-analysis, or both.                                                                                                                                                                                                                                         | 1                  |
| <b>ABSTRACT</b>                    |    |                                                                                                                                                                                                                                                                                                             |                    |
| Structured summary                 | 2  | Provide a structured summary including, as applicable: background; objectives; data sources; study eligibility criteria, participants, and interventions; study appraisal and synthesis methods; results; limitations; conclusions and implications of key findings; systematic review registration number. | 3                  |
| <b>INTRODUCTION</b>                |    |                                                                                                                                                                                                                                                                                                             |                    |
| Rationale                          | 3  | Describe the rationale for the review in the context of what is already known.                                                                                                                                                                                                                              | 4                  |
| Objectives                         | 4  | Provide an explicit statement of questions being addressed with reference to participants, interventions, comparisons, outcomes, and study design (PICOS).                                                                                                                                                  | 4                  |
| <b>METHODS</b>                     |    |                                                                                                                                                                                                                                                                                                             |                    |
| Protocol and registration          | 5  | Indicate if a review protocol exists, if and where it can be accessed (e.g., Web address), and, if available, provide registration information including registration number.                                                                                                                               | 5                  |
| Eligibility criteria               | 6  | Specify study characteristics (e.g., PICOS, length of follow-up) and report characteristics (e.g., years considered, language, publication status) used as criteria for eligibility, giving rationale.                                                                                                      | 5                  |
| Information sources                | 7  | Describe all information sources (e.g., databases with dates of coverage, contact with study authors to identify additional studies) in the search and date last searched.                                                                                                                                  | 5                  |
| Search                             | 8  | Present full electronic search strategy for at least one database, including any limits used, such that it could be repeated.                                                                                                                                                                               | 5                  |
| Study selection                    | 9  | State the process for selecting studies (i.e., screening, eligibility, included in systematic review, and, if applicable, included in the meta-analysis).                                                                                                                                                   | 5                  |
| Data collection process            | 10 | Describe method of data extraction from reports (e.g., piloted forms, independently, in duplicate) and any processes for obtaining and confirming data from investigators.                                                                                                                                  | 5                  |
| Data items                         | 11 | List and define all variables for which data were sought (e.g., PICOS, funding sources) and any assumptions and simplifications made.                                                                                                                                                                       | 5/6                |
| Risk of bias in individual studies | 12 | Describe methods used for assessing risk of bias of individual studies (including specification of whether this was done at the study or outcome level), and how this information is to be used in any data synthesis.                                                                                      | 6                  |
| Summary measures                   | 13 | State the principal summary measures (e.g., risk ratio, difference in means).                                                                                                                                                                                                                               | 6                  |
| Synthesis of results               | 14 | Describe the methods of handling data and combining results of studies, if done, including measures of consistency (e.g., $I^2$ ) for each meta-analysis.                                                                                                                                                   | 6                  |

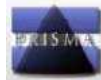

# PRISMA 2009 Checklist

Page 1 of 2

| Section/topic                 | #  | Checklist item                                                                                                                                                                                           | Reported on page # |
|-------------------------------|----|----------------------------------------------------------------------------------------------------------------------------------------------------------------------------------------------------------|--------------------|
| Risk of bias across studies   | 15 | Specify any assessment of risk of bias that may affect the cumulative evidence (e.g., publication bias, selective reporting within studies).                                                             | 6                  |
| Additional analyses           | 16 | Describe methods of additional analyses (e.g., sensitivity or subgroup analyses, meta-regression), if done, indicating which were pre-specified.                                                         | 6                  |
| <b>RESULTS</b>                |    |                                                                                                                                                                                                          |                    |
| Study selection               | 17 | Give numbers of studies screened, assessed for eligibility, and included in the review, with reasons for exclusions at each stage, ideally with a flow diagram.                                          | 6                  |
| Study characteristics         | 18 | For each study, present characteristics for which data were extracted (e.g., study size, PICOS, follow-up period) and provide the citations.                                                             | 6-11               |
| Risk of bias within studies   | 19 | Present data on risk of bias of each study and, if available, any outcome level assessment (see item 12).                                                                                                | 6-11               |
| Results of individual studies | 20 | For all outcomes considered (benefits or harms), present, for each study: (a) simple summary data for each intervention group (b) effect estimates and confidence intervals, ideally with a forest plot. | 6-11               |
| Synthesis of results          | 21 | Present results of each meta-analysis done, including confidence intervals and measures of consistency.                                                                                                  | 11/12              |
| Risk of bias across studies   | 22 | Present results of any assessment of risk of bias across studies (see Item 15).                                                                                                                          | 11/12              |
| Additional analysis           | 23 | Give results of additional analyses, if done (e.g., sensitivity or subgroup analyses, meta-regression [see Item 16]).                                                                                    | 11/12              |
| <b>DISCUSSION</b>             |    |                                                                                                                                                                                                          |                    |
| Summary of evidence           | 24 | Summarize the main findings including the strength of evidence for each main outcome; consider their relevance to key groups (e.g., healthcare providers, users, and policy makers).                     | 12                 |
| Limitations                   | 25 | Discuss limitations at study and outcome level (e.g., risk of bias), and at review-level (e.g., incomplete retrieval of identified research, reporting bias).                                            | 15                 |
| Conclusions                   | 26 | Provide a general interpretation of the results in the context of other evidence, and implications for future research.                                                                                  | 16                 |
| <b>FUNDING</b>                |    |                                                                                                                                                                                                          |                    |
| Funding                       | 27 | Describe sources of funding for the systematic review and other support (e.g., supply of data); role of funders for the systematic review.                                                               | 16/17              |

From: Moher D, Liberati A, Tetzlaff J, Altman DG, The PRISMA Group (2009). Preferred Reporting Items for Systematic Reviews and Meta-Analyses: The PRISMA Statement. PLoS Med 6(7): e1000097. doi:10.1371/journal.pmed1000097

For more information, visit: [www.prisma-statement.org](http://www.prisma-statement.org).

Page 2 of 2

For peer review only - <http://bmjopen.bmj.com/site/about/guidelines.xhtml>
